# Supplementary material for: Spud 1.0: generalising and automating the user interfaces of scientific computer models
Source: Copernicus journal article supplement (doi:10.5194/gmd-2-33-2009), 2009-03-06
Supplement: Supplementary file 1 [file gmd-2-33-2009-supplement.zip]

Archive with 109 entries (88 files):
- spud-1.0.7/
- spud-1.0.7/debian/
- spud-1.0.7/debian/diamond.docs
- spud-1.0.7/debian/control
- spud-1.0.7/debian/libspud-dev.copyright
- spud-1.0.7/debian/diamond.copyright
- spud-1.0.7/debian/compat
- spud-1.0.7/debian/spudtools.copyright
- spud-1.0.7/debian/libspud-dev.docs
- spud-1.0.7/debian/changelog
- spud-1.0.7/debian/rules
- spud-1.0.7/debian/diamond.dirs
- spud-1.0.7/debian/spudtools.dirs
- spud-1.0.7/debian/libspud-dev.dirs
- spud-1.0.7/configure
- spud-1.0.7/include/
- spud-1.0.7/include/tinystr.h
- spud-1.0.7/include/spud.h
- spud-1.0.7/include/spud_enums.h
- spud-1.0.7/include/cspud.h
- spud-1.0.7/include/spud_config.h.in
- spud-1.0.7/include/tinyxml.h
- spud-1.0.7/Makefile.in
- spud-1.0.7/configure.in
- spud-1.0.7/AUTHORS
- spud-1.0.7/src/
- spud-1.0.7/src/tests/
- spud-1.0.7/src/tests/test_main.cpp
- spud-1.0.7/src/tests/Makefile.in
- spud-1.0.7/src/tests/unittest_tools.f90
- spud-1.0.7/src/tests/test_fspud.f90
- spud-1.0.7/src/spud.cpp
- spud-1.0.7/src/spud_interfaces.cpp
- spud-1.0.7/src/tinyxmlerror.cpp
- spud-1.0.7/src/tinyxmlparser.cpp
- spud-1.0.7/src/tinyxml.cpp
- spud-1.0.7/src/tinystr.cpp
- spud-1.0.7/src/fspud.f90
- spud-1.0.7/schema/
- spud-1.0.7/schema/spud_base.rnc
- spud-1.0.7/schema/spud_base.rng
- spud-1.0.7/config.guess
- spud-1.0.7/LGPL-2.1
- spud-1.0.7/config.sub
- spud-1.0.7/README
- spud-1.0.7/doc/
- spud-1.0.7/doc/spud_manual.pdf
- spud-1.0.7/doc/spud_manual.tex
- spud-1.0.7/doc/Makefile
- spud-1.0.7/bin/
- spud-1.0.7/bin/spud-preprocess.in
- spud-1.0.7/bin/spud-set
- spud-1.0.7/diamond/
- spud-1.0.7/diamond/plugins/
- spud-1.0.7/diamond/plugins/flml/
- spud-1.0.7/diamond/plugins/flml/show_triangle_mesh.py
- spud-1.0.7/diamond/plugins/test.py
- spud-1.0.7/diamond/tests/
- spud-1.0.7/diamond/tests/schema/
- spud-1.0.7/diamond/tests/schema/test_references_schema.py
- spud-1.0.7/diamond/tests/schema/test_simple_schema.py
- spud-1.0.7/diamond/tests/schema/first.rnc
- spud-1.0.7/diamond/tests/schema/first.rng
- spud-1.0.7/diamond/tests/schema/test_cb_methods.py
- spud-1.0.7/diamond/tests/to_test.txt
- spud-1.0.7/diamond/tests/write_xml/
- spud-1.0.7/diamond/tests/plist/
- spud-1.0.7/diamond/tests/plist/plist.py
- spud-1.0.7/diamond/tests/read_xml/
- spud-1.0.7/diamond/tests/read_xml/find_hidden_xmldata.py
- spud-1.0.7/diamond/GPL-3
- spud-1.0.7/diamond/gui/
- spud-1.0.7/diamond/gui/gui.glade
- spud-1.0.7/diamond/gui/diamond.svg
- spud-1.0.7/diamond/todo.txt
- spud-1.0.7/diamond/doc/
- spud-1.0.7/diamond/doc/main.xml
- spud-1.0.7/diamond/bin/
- spud-1.0.7/diamond/bin/diamond
- spud-1.0.7/diamond/COPYING
- spud-1.0.7/diamond/diamond/
- spud-1.0.7/diamond/diamond/preprocess.py.in
- spud-1.0.7/diamond/diamond/choice.py
- spud-1.0.7/diamond/diamond/__init__.py
- spud-1.0.7/diamond/diamond/plist.py
- spud-1.0.7/diamond/diamond/TextBufferMarkup.py
- spud-1.0.7/diamond/diamond/tree.py
- spud-1.0.7/diamond/diamond/interface.py
- spud-1.0.7/diamond/diamond/schema.py
- spud-1.0.7/diamond/diamond/plugins.py
- spud-1.0.7/diamond/diamond/pygtkconsole.py
- spud-1.0.7/diamond/diamond/dialogs.py
- spud-1.0.7/diamond/diamond/config.py
- spud-1.0.7/diamond/diamond/debug.py
- spud-1.0.7/diamond/diamond/scherror.py
- spud-1.0.7/diamond/diamond/triangle_reader.py
- spud-1.0.7/diamond/MANIFEST.in
- spud-1.0.7/diamond/README.txt
- spud-1.0.7/diamond/setup.py.in
- spud-1.0.7/COPYING
- spud-1.0.7/examples/
- spud-1.0.7/examples/ballistics.F90
- spud-1.0.7/examples/Makefile.in
- spud-1.0.7/examples/ballistics.xml
- spud-1.0.7/examples/show_ballistics
- spud-1.0.7/examples/ballistics.rnc
- spud-1.0.7/examples/README
- spud-1.0.7/examples/ballistics.rng
- spud-1.0.7/install-sh
