# Supplementary material for: Spud 1.0: generalising and automating the user interfaces of scientific computer models
Source: Copernicus journal article supplement (doi:10.5194/gmd-2-33-2009), 2009-03-06
Supplement: Supplementary file 1 [file gmd-2-33-2009-supplement.zip › spud-1.0.7/AUTHORS]

Spud has been contributed to by the following authors:

Institutions
------------

Imperial College London
University of Oxford

Individuals
-----------

Gareth Collins
Colin Cotter 		<colin.cotter@imperial.ac.uk>
Patrick Farrell 	<patrick.farrell@imperial.ac.uk> 
David Ham 		<david.ham@imperial.ac.uk>
Gerard Gorman 		<g.gorman@imperial.ac.uk>
Stephan Kramer
James Maddison
Matthew Piggott 	<m.d.piggott@imperial.ac.uk>
Jemma Shipton
Adrian Umpleby 		<adrian@imperial.ac.uk>
Cian Wilson
