# Supplementary material for: Spud 1.0: generalising and automating the user interfaces of scientific computer models
Source: Copernicus journal article supplement (doi:10.5194/gmd-2-33-2009), 2009-03-06
Supplement: Supplementary file 1 [file gmd-2-33-2009-supplement.zip › spud-1.0.7/bin/spud-preprocess.in]

#!/usr/bin/env bash

if [ $# -ne 1 ]; then
  echo "Usage: $0 schema.rnc" >&2
  exit 1
fi

if ! which trang > /dev/null; then
  echo "Error: cannot locate trang, a dependency of spud." >&2
  echo "Please install trang."
  exit 1
fi

cp @prefix@/share/spud/spud_base.rnc $(dirname $1)
trang $1 ${1/rnc/rng}
rm -f $(dirname $1)/spud_base.rn{c,g}
