# Supplementary material for: Spud 1.0: generalising and automating the user interfaces of scientific computer models
Source: Copernicus journal article supplement (doi:10.5194/gmd-2-33-2009), 2009-03-06
Supplement: Supplementary file 1 [file gmd-2-33-2009-supplement.zip › spud-1.0.7/configure]

#! /bin/sh
# Guess values for system-dependent variables and create Makefiles.
# Generated by GNU Autoconf 2.61.
#
# Copyright (C) 1992, 1993, 1994, 1995, 1996, 1998, 1999, 2000, 2001,
# 2002, 2003, 2004, 2005, 2006 Free Software Foundation, Inc.
# This configure script is free software; the Free Software Foundation
# gives unlimited permission to copy, distribute and modify it.
## --------------------- ##
## M4sh Initialization.  ##
## --------------------- ##

# Be more Bourne compatible
DUALCASE=1; export DUALCASE # for MKS sh
if test -n "${ZSH_VERSION+set}" && (emulate sh) >/dev/null 2>&1; then
  emulate sh
  NULLCMD=:
  # Zsh 3.x and 4.x performs word splitting on ${1+"$@"}, which
  # is contrary to our usage.  Disable this feature.
  alias -g '${1+"$@"}'='"$@"'
  setopt NO_GLOB_SUBST
else
  case `(set -o) 2>/dev/null` in
  *posix*) set -o posix ;;
esac

fi


# PATH needs CR
# Avoid depending upon Character Ranges.
as_cr_letters='abcdefghijklmnopqrstuvwxyz'
as_cr_LETTERS='ABCDEFGHIJKLMNOPQRSTUVWXYZ'
as_cr_Letters=$as_cr_letters$as_cr_LETTERS
as_cr_digits='0123456789'
as_cr_alnum=$as_cr_Letters$as_cr_digits

# The user is always right.
if test "${PATH_SEPARATOR+set}" != set; then
  echo "#! /bin/sh" >conf$$.sh
  echo  "exit 0"   >>conf$$.sh
  chmod +x conf$$.sh
  if (PATH="/nonexistent;."; conf$$.sh) >/dev/null 2>&1; then
    PATH_SEPARATOR=';'
  else
    PATH_SEPARATOR=:
  fi
  rm -f conf$$.sh
fi

# Support unset when possible.
if ( (MAIL=60; unset MAIL) || exit) >/dev/null 2>&1; then
  as_unset=unset
else
  as_unset=false
fi


# IFS
# We need space, tab and new line, in precisely that order.  Quoting is
# there to prevent editors from complaining about space-tab.
# (If _AS_PATH_WALK were called with IFS unset, it would disable word
# splitting by setting IFS to empty value.)
as_nl='
'
IFS=" ""	$as_nl"

# Find who we are.  Look in the path if we contain no directory separator.
case $0 in
  *[\\/]* ) as_myself=$0 ;;
  *) as_save_IFS=$IFS; IFS=$PATH_SEPARATOR
for as_dir in $PATH
do
  IFS=$as_save_IFS
  test -z "$as_dir" && as_dir=.
  test -r "$as_dir/$0" && as_myself=$as_dir/$0 && break
done
IFS=$as_save_IFS

     ;;
esac
# We did not find ourselves, most probably we were run as `sh COMMAND'
# in which case we are not to be found in the path.
if test "x$as_myself" = x; then
  as_myself=$0
fi
if test ! -f "$as_myself"; then
  echo "$as_myself: error: cannot find myself; rerun with an absolute file name" >&2
  { (exit 1); exit 1; }
fi

# Work around bugs in pre-3.0 UWIN ksh.
for as_var in ENV MAIL MAILPATH
do ($as_unset $as_var) >/dev/null 2>&1 && $as_unset $as_var
done
PS1='$ '
PS2='> '
PS4='+ '

# NLS nuisances.
for as_var in \
  LANG LANGUAGE LC_ADDRESS LC_ALL LC_COLLATE LC_CTYPE LC_IDENTIFICATION \
  LC_MEASUREMENT LC_MESSAGES LC_MONETARY LC_NAME LC_NUMERIC LC_PAPER \
  LC_TELEPHONE LC_TIME
do
  if (set +x; test -z "`(eval $as_var=C; export $as_var) 2>&1`"); then
    eval $as_var=C; export $as_var
  else
    ($as_unset $as_var) >/dev/null 2>&1 && $as_unset $as_var
  fi
done

# Required to use basename.
if expr a : '\(a\)' >/dev/null 2>&1 &&
   test "X`expr 00001 : '.*\(...\)'`" = X001; then
  as_expr=expr
else
  as_expr=false
fi

if (basename -- /) >/dev/null 2>&1 && test "X`basename -- / 2>&1`" = "X/"; then
  as_basename=basename
else
  as_basename=false
fi


# Name of the executable.
as_me=`$as_basename -- "$0" ||
$as_expr X/"$0" : '.*/\([^/][^/]*\)/*$' \| \
	 X"$0" : 'X\(//\)$' \| \
	 X"$0" : 'X\(/\)' \| . 2>/dev/null ||
echo X/"$0" |
    sed '/^.*\/\([^/][^/]*\)\/*$/{
	    s//\1/
	    q
	  }
	  /^X\/\(\/\/\)$/{
	    s//\1/
	    q
	  }
	  /^X\/\(\/\).*/{
	    s//\1/
	    q
	  }
	  s/.*/./; q'`

# CDPATH.
$as_unset CDPATH


if test "x$CONFIG_SHELL" = x; then
  if (eval ":") 2>/dev/null; then
  as_have_required=yes
else
  as_have_required=no
fi

  if test $as_have_required = yes && 	 (eval ":
(as_func_return () {
  (exit \$1)
}
as_func_success () {
  as_func_return 0
}
as_func_failure () {
  as_func_return 1
}
as_func_ret_success () {
  return 0
}
as_func_ret_failure () {
  return 1
}

exitcode=0
if as_func_success; then
  :
else
  exitcode=1
  echo as_func_success failed.
fi

if as_func_failure; then
  exitcode=1
  echo as_func_failure succeeded.
fi

if as_func_ret_success; then
  :
else
  exitcode=1
  echo as_func_ret_success failed.
fi

if as_func_ret_failure; then
  exitcode=1
  echo as_func_ret_failure succeeded.
fi

if ( set x; as_func_ret_success y && test x = \"\$1\" ); then
  :
else
  exitcode=1
  echo positional parameters were not saved.
fi

test \$exitcode = 0) || { (exit 1); exit 1; }

(
  as_lineno_1=\$LINENO
  as_lineno_2=\$LINENO
  test \"x\$as_lineno_1\" != \"x\$as_lineno_2\" &&
  test \"x\`expr \$as_lineno_1 + 1\`\" = \"x\$as_lineno_2\") || { (exit 1); exit 1; }
") 2> /dev/null; then
  :
else
  as_candidate_shells=
    as_save_IFS=$IFS; IFS=$PATH_SEPARATOR
for as_dir in /bin$PATH_SEPARATOR/usr/bin$PATH_SEPARATOR$PATH
do
  IFS=$as_save_IFS
  test -z "$as_dir" && as_dir=.
  case $as_dir in
	 /*)
	   for as_base in sh bash ksh sh5; do
	     as_candidate_shells="$as_candidate_shells $as_dir/$as_base"
	   done;;
       esac
done
IFS=$as_save_IFS


      for as_shell in $as_candidate_shells $SHELL; do
	 # Try only shells that exist, to save several forks.
	 if { test -f "$as_shell" || test -f "$as_shell.exe"; } &&
		{ ("$as_shell") 2> /dev/null <<\_ASEOF
if test -n "${ZSH_VERSION+set}" && (emulate sh) >/dev/null 2>&1; then
  emulate sh
  NULLCMD=:
  # Zsh 3.x and 4.x performs word splitting on ${1+"$@"}, which
  # is contrary to our usage.  Disable this feature.
  alias -g '${1+"$@"}'='"$@"'
  setopt NO_GLOB_SUBST
else
  case `(set -o) 2>/dev/null` in
  *posix*) set -o posix ;;
esac

fi


:
_ASEOF
}; then
  CONFIG_SHELL=$as_shell
	       as_have_required=yes
	       if { "$as_shell" 2> /dev/null <<\_ASEOF
if test -n "${ZSH_VERSION+set}" && (emulate sh) >/dev/null 2>&1; then
  emulate sh
  NULLCMD=:
  # Zsh 3.x and 4.x performs word splitting on ${1+"$@"}, which
  # is contrary to our usage.  Disable this feature.
  alias -g '${1+"$@"}'='"$@"'
  setopt NO_GLOB_SUBST
else
  case `(set -o) 2>/dev/null` in
  *posix*) set -o posix ;;
esac

fi


:
(as_func_return () {
  (exit $1)
}
as_func_success () {
  as_func_return 0
}
as_func_failure () {
  as_func_return 1
}
as_func_ret_success () {
  return 0
}
as_func_ret_failure () {
  return 1
}

exitcode=0
if as_func_success; then
  :
else
  exitcode=1
  echo as_func_success failed.
fi

if as_func_failure; then
  exitcode=1
  echo as_func_failure succeeded.
fi

if as_func_ret_success; then
  :
else
  exitcode=1
  echo as_func_ret_success failed.
fi

if as_func_ret_failure; then
  exitcode=1
  echo as_func_ret_failure succeeded.
fi

if ( set x; as_func_ret_success y && test x = "$1" ); then
  :
else
  exitcode=1
  echo positional parameters were not saved.
fi

test $exitcode = 0) || { (exit 1); exit 1; }

(
  as_lineno_1=$LINENO
  as_lineno_2=$LINENO
  test "x$as_lineno_1" != "x$as_lineno_2" &&
  test "x`expr $as_lineno_1 + 1`" = "x$as_lineno_2") || { (exit 1); exit 1; }

_ASEOF
}; then
  break
fi

fi

      done

      if test "x$CONFIG_SHELL" != x; then
  for as_var in BASH_ENV ENV
        do ($as_unset $as_var) >/dev/null 2>&1 && $as_unset $as_var
        done
        export CONFIG_SHELL
        exec "$CONFIG_SHELL" "$as_myself" ${1+"$@"}
fi


    if test $as_have_required = no; then
  echo This script requires a shell more modern than all the
      echo shells that I found on your system.  Please install a
      echo modern shell, or manually run the script under such a
      echo shell if you do have one.
      { (exit 1); exit 1; }
fi


fi

fi


(eval "as_func_return () {
  (exit \$1)
}
as_func_success () {
  as_func_return 0
}
as_func_failure () {
  as_func_return 1
}
as_func_ret_success () {
  return 0
}
as_func_ret_failure () {
  return 1
}

exitcode=0
if as_func_success; then
  :
else
  exitcode=1
  echo as_func_success failed.
fi

if as_func_failure; then
  exitcode=1
  echo as_func_failure succeeded.
fi

if as_func_ret_success; then
  :
else
  exitcode=1
  echo as_func_ret_success failed.
fi

if as_func_ret_failure; then
  exitcode=1
  echo as_func_ret_failure succeeded.
fi

if ( set x; as_func_ret_success y && test x = \"\$1\" ); then
  :
else
  exitcode=1
  echo positional parameters were not saved.
fi

test \$exitcode = 0") || {
  echo No shell found that supports shell functions.
  echo Please tell autoconf@gnu.org about your system,
  echo including any error possibly output before this
  echo message
}


  as_lineno_1=$LINENO
  as_lineno_2=$LINENO
  test "x$as_lineno_1" != "x$as_lineno_2" &&
  test "x`expr $as_lineno_1 + 1`" = "x$as_lineno_2" || {

  # Create $as_me.lineno as a copy of $as_myself, but with $LINENO
  # uniformly replaced by the line number.  The first 'sed' inserts a
  # line-number line after each line using $LINENO; the second 'sed'
  # does the real work.  The second script uses 'N' to pair each
  # line-number line with the line containing $LINENO, and appends
  # trailing '-' during substitution so that $LINENO is not a special
  # case at line end.
  # (Raja R Harinath suggested sed '=', and Paul Eggert wrote the
  # scripts with optimization help from Paolo Bonzini.  Blame Lee
  # E. McMahon (1931-1989) for sed's syntax.  :-)
  sed -n '
    p
    /[$]LINENO/=
  ' <$as_myself |
    sed '
      s/[$]LINENO.*/&-/
      t lineno
      b
      :lineno
      N
      :loop
      s/[$]LINENO\([^'$as_cr_alnum'_].*\n\)\(.*\)/\2\1\2/
      t loop
      s/-\n.*//
    ' >$as_me.lineno &&
  chmod +x "$as_me.lineno" ||
    { echo "$as_me: error: cannot create $as_me.lineno; rerun with a POSIX shell" >&2
   { (exit 1); exit 1; }; }

  # Don't try to exec as it changes $[0], causing all sort of problems
  # (the dirname of $[0] is not the place where we might find the
  # original and so on.  Autoconf is especially sensitive to this).
  . "./$as_me.lineno"
  # Exit status is that of the last command.
  exit
}


if (as_dir=`dirname -- /` && test "X$as_dir" = X/) >/dev/null 2>&1; then
  as_dirname=dirname
else
  as_dirname=false
fi

ECHO_C= ECHO_N= ECHO_T=
case `echo -n x` in
-n*)
  case `echo 'x\c'` in
  *c*) ECHO_T='	';;	# ECHO_T is single tab character.
  *)   ECHO_C='\c';;
  esac;;
*)
  ECHO_N='-n';;
esac

if expr a : '\(a\)' >/dev/null 2>&1 &&
   test "X`expr 00001 : '.*\(...\)'`" = X001; then
  as_expr=expr
else
  as_expr=false
fi

rm -f conf$$ conf$$.exe conf$$.file
if test -d conf$$.dir; then
  rm -f conf$$.dir/conf$$.file
else
  rm -f conf$$.dir
  mkdir conf$$.dir
fi
echo >conf$$.file
if ln -s conf$$.file conf$$ 2>/dev/null; then
  as_ln_s='ln -s'
  # ... but there are two gotchas:
  # 1) On MSYS, both `ln -s file dir' and `ln file dir' fail.
  # 2) DJGPP < 2.04 has no symlinks; `ln -s' creates a wrapper executable.
  # In both cases, we have to default to `cp -p'.
  ln -s conf$$.file conf$$.dir 2>/dev/null && test ! -f conf$$.exe ||
    as_ln_s='cp -p'
elif ln conf$$.file conf$$ 2>/dev/null; then
  as_ln_s=ln
else
  as_ln_s='cp -p'
fi
rm -f conf$$ conf$$.exe conf$$.dir/conf$$.file conf$$.file
rmdir conf$$.dir 2>/dev/null

if mkdir -p . 2>/dev/null; then
  as_mkdir_p=:
else
  test -d ./-p && rmdir ./-p
  as_mkdir_p=false
fi

if test -x / >/dev/null 2>&1; then
  as_test_x='test -x'
else
  if ls -dL / >/dev/null 2>&1; then
    as_ls_L_option=L
  else
    as_ls_L_option=
  fi
  as_test_x='
    eval sh -c '\''
      if test -d "$1"; then
        test -d "$1/.";
      else
	case $1 in
        -*)set "./$1";;
	esac;
	case `ls -ld'$as_ls_L_option' "$1" 2>/dev/null` in
	???[sx]*):;;*)false;;esac;fi
    '\'' sh
  '
fi
as_executable_p=$as_test_x

# Sed expression to map a string onto a valid CPP name.
as_tr_cpp="eval sed 'y%*$as_cr_letters%P$as_cr_LETTERS%;s%[^_$as_cr_alnum]%_%g'"

# Sed expression to map a string onto a valid variable name.
as_tr_sh="eval sed 'y%*+%pp%;s%[^_$as_cr_alnum]%_%g'"


exec 7<&0 </dev/null 6>&1

# Name of the host.
# hostname on some systems (SVR3.2, Linux) returns a bogus exit status,
# so uname gets run too.
ac_hostname=`(hostname || uname -n) 2>/dev/null | sed 1q`

#
# Initializations.
#
ac_default_prefix=/usr/local
ac_clean_files=
ac_config_libobj_dir=.
LIBOBJS=
cross_compiling=no
subdirs=
MFLAGS=
MAKEFLAGS=
SHELL=${CONFIG_SHELL-/bin/sh}

# Identity of this package.
PACKAGE_NAME=
PACKAGE_TARNAME=
PACKAGE_VERSION=
PACKAGE_STRING=
PACKAGE_BUGREPORT=

ac_unique_file="include/spud.h"
# Factoring default headers for most tests.
ac_includes_default="\
#include <stdio.h>
#ifdef HAVE_SYS_TYPES_H
# include <sys/types.h>
#endif
#ifdef HAVE_SYS_STAT_H
# include <sys/stat.h>
#endif
#ifdef STDC_HEADERS
# include <stdlib.h>
# include <stddef.h>
#else
# ifdef HAVE_STDLIB_H
#  include <stdlib.h>
# endif
#endif
#ifdef HAVE_STRING_H
# if !defined STDC_HEADERS && defined HAVE_MEMORY_H
#  include <memory.h>
# endif
# include <string.h>
#endif
#ifdef HAVE_STRINGS_H
# include <strings.h>
#endif
#ifdef HAVE_INTTYPES_H
# include <inttypes.h>
#endif
#ifdef HAVE_STDINT_H
# include <stdint.h>
#endif
#ifdef HAVE_UNISTD_H
# include <unistd.h>
#endif"

ac_subst_vars='SHELL
PATH_SEPARATOR
PACKAGE_NAME
PACKAGE_TARNAME
PACKAGE_VERSION
PACKAGE_STRING
PACKAGE_BUGREPORT
exec_prefix
prefix
program_transform_name
bindir
sbindir
libexecdir
datarootdir
datadir
sysconfdir
sharedstatedir
localstatedir
includedir
oldincludedir
docdir
infodir
htmldir
dvidir
pdfdir
psdir
libdir
localedir
mandir
DEFS
ECHO_C
ECHO_N
ECHO_T
LIBS
build_alias
host_alias
target_alias
build
build_cpu
build_vendor
build_os
host
host_cpu
host_vendor
host_os
F77
FFLAGS
LDFLAGS
ac_ct_F77
EXEEXT
OBJEXT
FLIBS
FC
FCFLAGS
ac_ct_FC
FCLIBS
CXX
CXXFLAGS
CPPFLAGS
ac_ct_CXX
CC
CFLAGS
ac_ct_CC
CPP
GREP
EGREP
INSTALL_PROGRAM
INSTALL_SCRIPT
INSTALL_DATA
MAKE
AR
RANLIB
PROFILING_FLAG
VERSION
ARFLAGS
LINKER
LIBOBJS
LTLIBOBJS'
ac_subst_files=''
      ac_precious_vars='build_alias
host_alias
target_alias
F77
FFLAGS
LDFLAGS
LIBS
FC
FCFLAGS
CXX
CXXFLAGS
CPPFLAGS
CCC
CC
CFLAGS
CPP'


# Initialize some variables set by options.
ac_init_help=
ac_init_version=false
# The variables have the same names as the options, with
# dashes changed to underlines.
cache_file=/dev/null
exec_prefix=NONE
no_create=
no_recursion=
prefix=NONE
program_prefix=NONE
program_suffix=NONE
program_transform_name=s,x,x,
silent=
site=
srcdir=
verbose=
x_includes=NONE
x_libraries=NONE

# Installation directory options.
# These are left unexpanded so users can "make install exec_prefix=/foo"
# and all the variables that are supposed to be based on exec_prefix
# by default will actually change.
# Use braces instead of parens because sh, perl, etc. also accept them.
# (The list follows the same order as the GNU Coding Standards.)
bindir='${exec_prefix}/bin'
sbindir='${exec_prefix}/sbin'
libexecdir='${exec_prefix}/libexec'
datarootdir='${prefix}/share'
datadir='${datarootdir}'
sysconfdir='${prefix}/etc'
sharedstatedir='${prefix}/com'
localstatedir='${prefix}/var'
includedir='${prefix}/include'
oldincludedir='/usr/include'
docdir='${datarootdir}/doc/${PACKAGE}'
infodir='${datarootdir}/info'
htmldir='${docdir}'
dvidir='${docdir}'
pdfdir='${docdir}'
psdir='${docdir}'
libdir='${exec_prefix}/lib'
localedir='${datarootdir}/locale'
mandir='${datarootdir}/man'

ac_prev=
ac_dashdash=
for ac_option
do
  # If the previous option needs an argument, assign it.
  if test -n "$ac_prev"; then
    eval $ac_prev=\$ac_option
    ac_prev=
    continue
  fi

  case $ac_option in
  *=*)	ac_optarg=`expr "X$ac_option" : '[^=]*=\(.*\)'` ;;
  *)	ac_optarg=yes ;;
  esac

  # Accept the important Cygnus configure options, so we can diagnose typos.

  case $ac_dashdash$ac_option in
  --)
    ac_dashdash=yes ;;

  -bindir | --bindir | --bindi | --bind | --bin | --bi)
    ac_prev=bindir ;;
  -bindir=* | --bindir=* | --bindi=* | --bind=* | --bin=* | --bi=*)
    bindir=$ac_optarg ;;

  -build | --build | --buil | --bui | --bu)
    ac_prev=build_alias ;;
  -build=* | --build=* | --buil=* | --bui=* | --bu=*)
    build_alias=$ac_optarg ;;

  -cache-file | --cache-file | --cache-fil | --cache-fi \
  | --cache-f | --cache- | --cache | --cach | --cac | --ca | --c)
    ac_prev=cache_file ;;
  -cache-file=* | --cache-file=* | --cache-fil=* | --cache-fi=* \
  | --cache-f=* | --cache-=* | --cache=* | --cach=* | --cac=* | --ca=* | --c=*)
    cache_file=$ac_optarg ;;

  --config-cache | -C)
    cache_file=config.cache ;;

  -datadir | --datadir | --datadi | --datad)
    ac_prev=datadir ;;
  -datadir=* | --datadir=* | --datadi=* | --datad=*)
    datadir=$ac_optarg ;;

  -datarootdir | --datarootdir | --datarootdi | --datarootd | --dataroot \
  | --dataroo | --dataro | --datar)
    ac_prev=datarootdir ;;
  -datarootdir=* | --datarootdir=* | --datarootdi=* | --datarootd=* \
  | --dataroot=* | --dataroo=* | --dataro=* | --datar=*)
    datarootdir=$ac_optarg ;;

  -disable-* | --disable-*)
    ac_feature=`expr "x$ac_option" : 'x-*disable-\(.*\)'`
    # Reject names that are not valid shell variable names.
    expr "x$ac_feature" : ".*[^-._$as_cr_alnum]" >/dev/null &&
      { echo "$as_me: error: invalid feature name: $ac_feature" >&2
   { (exit 1); exit 1; }; }
    ac_feature=`echo $ac_feature | sed 's/[-.]/_/g'`
    eval enable_$ac_feature=no ;;

  -docdir | --docdir | --docdi | --doc | --do)
    ac_prev=docdir ;;
  -docdir=* | --docdir=* | --docdi=* | --doc=* | --do=*)
    docdir=$ac_optarg ;;

  -dvidir | --dvidir | --dvidi | --dvid | --dvi | --dv)
    ac_prev=dvidir ;;
  -dvidir=* | --dvidir=* | --dvidi=* | --dvid=* | --dvi=* | --dv=*)
    dvidir=$ac_optarg ;;

  -enable-* | --enable-*)
    ac_feature=`expr "x$ac_option" : 'x-*enable-\([^=]*\)'`
    # Reject names that are not valid shell variable names.
    expr "x$ac_feature" : ".*[^-._$as_cr_alnum]" >/dev/null &&
      { echo "$as_me: error: invalid feature name: $ac_feature" >&2
   { (exit 1); exit 1; }; }
    ac_feature=`echo $ac_feature | sed 's/[-.]/_/g'`
    eval enable_$ac_feature=\$ac_optarg ;;

  -exec-prefix | --exec_prefix | --exec-prefix | --exec-prefi \
  | --exec-pref | --exec-pre | --exec-pr | --exec-p | --exec- \
  | --exec | --exe | --ex)
    ac_prev=exec_prefix ;;
  -exec-prefix=* | --exec_prefix=* | --exec-prefix=* | --exec-prefi=* \
  | --exec-pref=* | --exec-pre=* | --exec-pr=* | --exec-p=* | --exec-=* \
  | --exec=* | --exe=* | --ex=*)
    exec_prefix=$ac_optarg ;;

  -gas | --gas | --ga | --g)
    # Obsolete; use --with-gas.
    with_gas=yes ;;

  -help | --help | --hel | --he | -h)
    ac_init_help=long ;;
  -help=r* | --help=r* | --hel=r* | --he=r* | -hr*)
    ac_init_help=recursive ;;
  -help=s* | --help=s* | --hel=s* | --he=s* | -hs*)
    ac_init_help=short ;;

  -host | --host | --hos | --ho)
    ac_prev=host_alias ;;
  -host=* | --host=* | --hos=* | --ho=*)
    host_alias=$ac_optarg ;;

  -htmldir | --htmldir | --htmldi | --htmld | --html | --htm | --ht)
    ac_prev=htmldir ;;
  -htmldir=* | --htmldir=* | --htmldi=* | --htmld=* | --html=* | --htm=* \
  | --ht=*)
    htmldir=$ac_optarg ;;

  -includedir | --includedir | --includedi | --included | --include \
  | --includ | --inclu | --incl | --inc)
    ac_prev=includedir ;;
  -includedir=* | --includedir=* | --includedi=* | --included=* | --include=* \
  | --includ=* | --inclu=* | --incl=* | --inc=*)
    includedir=$ac_optarg ;;

  -infodir | --infodir | --infodi | --infod | --info | --inf)
    ac_prev=infodir ;;
  -infodir=* | --infodir=* | --infodi=* | --infod=* | --info=* | --inf=*)
    infodir=$ac_optarg ;;

  -libdir | --libdir | --libdi | --libd)
    ac_prev=libdir ;;
  -libdir=* | --libdir=* | --libdi=* | --libd=*)
    libdir=$ac_optarg ;;

  -libexecdir | --libexecdir | --libexecdi | --libexecd | --libexec \
  | --libexe | --libex | --libe)
    ac_prev=libexecdir ;;
  -libexecdir=* | --libexecdir=* | --libexecdi=* | --libexecd=* | --libexec=* \
  | --libexe=* | --libex=* | --libe=*)
    libexecdir=$ac_optarg ;;

  -localedir | --localedir | --localedi | --localed | --locale)
    ac_prev=localedir ;;
  -localedir=* | --localedir=* | --localedi=* | --localed=* | --locale=*)
    localedir=$ac_optarg ;;

  -localstatedir | --localstatedir | --localstatedi | --localstated \
  | --localstate | --localstat | --localsta | --localst | --locals)
    ac_prev=localstatedir ;;
  -localstatedir=* | --localstatedir=* | --localstatedi=* | --localstated=* \
  | --localstate=* | --localstat=* | --localsta=* | --localst=* | --locals=*)
    localstatedir=$ac_optarg ;;

  -mandir | --mandir | --mandi | --mand | --man | --ma | --m)
    ac_prev=mandir ;;
  -mandir=* | --mandir=* | --mandi=* | --mand=* | --man=* | --ma=* | --m=*)
    mandir=$ac_optarg ;;

  -nfp | --nfp | --nf)
    # Obsolete; use --without-fp.
    with_fp=no ;;

  -no-create | --no-create | --no-creat | --no-crea | --no-cre \
  | --no-cr | --no-c | -n)
    no_create=yes ;;

  -no-recursion | --no-recursion | --no-recursio | --no-recursi \
  | --no-recurs | --no-recur | --no-recu | --no-rec | --no-re | --no-r)
    no_recursion=yes ;;

  -oldincludedir | --oldincludedir | --oldincludedi | --oldincluded \
  | --oldinclude | --oldinclud | --oldinclu | --oldincl | --oldinc \
  | --oldin | --oldi | --old | --ol | --o)
    ac_prev=oldincludedir ;;
  -oldincludedir=* | --oldincludedir=* | --oldincludedi=* | --oldincluded=* \
  | --oldinclude=* | --oldinclud=* | --oldinclu=* | --oldincl=* | --oldinc=* \
  | --oldin=* | --oldi=* | --old=* | --ol=* | --o=*)
    oldincludedir=$ac_optarg ;;

  -prefix | --prefix | --prefi | --pref | --pre | --pr | --p)
    ac_prev=prefix ;;
  -prefix=* | --prefix=* | --prefi=* | --pref=* | --pre=* | --pr=* | --p=*)
    prefix=$ac_optarg ;;

  -program-prefix | --program-prefix | --program-prefi | --program-pref \
  | --program-pre | --program-pr | --program-p)
    ac_prev=program_prefix ;;
  -program-prefix=* | --program-prefix=* | --program-prefi=* \
  | --program-pref=* | --program-pre=* | --program-pr=* | --program-p=*)
    program_prefix=$ac_optarg ;;

  -program-suffix | --program-suffix | --program-suffi | --program-suff \
  | --program-suf | --program-su | --program-s)
    ac_prev=program_suffix ;;
  -program-suffix=* | --program-suffix=* | --program-suffi=* \
  | --program-suff=* | --program-suf=* | --program-su=* | --program-s=*)
    program_suffix=$ac_optarg ;;

  -program-transform-name | --program-transform-name \
  | --program-transform-nam | --program-transform-na \
  | --program-transform-n | --program-transform- \
  | --program-transform | --program-transfor \
  | --program-transfo | --program-transf \
  | --program-trans | --program-tran \
  | --progr-tra | --program-tr | --program-t)
    ac_prev=program_transform_name ;;
  -program-transform-name=* | --program-transform-name=* \
  | --program-transform-nam=* | --program-transform-na=* \
  | --program-transform-n=* | --program-transform-=* \
  | --program-transform=* | --program-transfor=* \
  | --program-transfo=* | --program-transf=* \
  | --program-trans=* | --program-tran=* \
  | --progr-tra=* | --program-tr=* | --program-t=*)
    program_transform_name=$ac_optarg ;;

  -pdfdir | --pdfdir | --pdfdi | --pdfd | --pdf | --pd)
    ac_prev=pdfdir ;;
  -pdfdir=* | --pdfdir=* | --pdfdi=* | --pdfd=* | --pdf=* | --pd=*)
    pdfdir=$ac_optarg ;;

  -psdir | --psdir | --psdi | --psd | --ps)
    ac_prev=psdir ;;
  -psdir=* | --psdir=* | --psdi=* | --psd=* | --ps=*)
    psdir=$ac_optarg ;;

  -q | -quiet | --quiet | --quie | --qui | --qu | --q \
  | -silent | --silent | --silen | --sile | --sil)
    silent=yes ;;

  -sbindir | --sbindir | --sbindi | --sbind | --sbin | --sbi | --sb)
    ac_prev=sbindir ;;
  -sbindir=* | --sbindir=* | --sbindi=* | --sbind=* | --sbin=* \
  | --sbi=* | --sb=*)
    sbindir=$ac_optarg ;;

  -sharedstatedir | --sharedstatedir | --sharedstatedi \
  | --sharedstated | --sharedstate | --sharedstat | --sharedsta \
  | --sharedst | --shareds | --shared | --share | --shar \
  | --sha | --sh)
    ac_prev=sharedstatedir ;;
  -sharedstatedir=* | --sharedstatedir=* | --sharedstatedi=* \
  | --sharedstated=* | --sharedstate=* | --sharedstat=* | --sharedsta=* \
  | --sharedst=* | --shareds=* | --shared=* | --share=* | --shar=* \
  | --sha=* | --sh=*)
    sharedstatedir=$ac_optarg ;;

  -site | --site | --sit)
    ac_prev=site ;;
  -site=* | --site=* | --sit=*)
    site=$ac_optarg ;;

  -srcdir | --srcdir | --srcdi | --srcd | --src | --sr)
    ac_prev=srcdir ;;
  -srcdir=* | --srcdir=* | --srcdi=* | --srcd=* | --src=* | --sr=*)
    srcdir=$ac_optarg ;;

  -sysconfdir | --sysconfdir | --sysconfdi | --sysconfd | --sysconf \
  | --syscon | --sysco | --sysc | --sys | --sy)
    ac_prev=sysconfdir ;;
  -sysconfdir=* | --sysconfdir=* | --sysconfdi=* | --sysconfd=* | --sysconf=* \
  | --syscon=* | --sysco=* | --sysc=* | --sys=* | --sy=*)
    sysconfdir=$ac_optarg ;;

  -target | --target | --targe | --targ | --tar | --ta | --t)
    ac_prev=target_alias ;;
  -target=* | --target=* | --targe=* | --targ=* | --tar=* | --ta=* | --t=*)
    target_alias=$ac_optarg ;;

  -v | -verbose | --verbose | --verbos | --verbo | --verb)
    verbose=yes ;;

  -version | --version | --versio | --versi | --vers | -V)
    ac_init_version=: ;;

  -with-* | --with-*)
    ac_package=`expr "x$ac_option" : 'x-*with-\([^=]*\)'`
    # Reject names that are not valid shell variable names.
    expr "x$ac_package" : ".*[^-._$as_cr_alnum]" >/dev/null &&
      { echo "$as_me: error: invalid package name: $ac_package" >&2
   { (exit 1); exit 1; }; }
    ac_package=`echo $ac_package | sed 's/[-.]/_/g'`
    eval with_$ac_package=\$ac_optarg ;;

  -without-* | --without-*)
    ac_package=`expr "x$ac_option" : 'x-*without-\(.*\)'`
    # Reject names that are not valid shell variable names.
    expr "x$ac_package" : ".*[^-._$as_cr_alnum]" >/dev/null &&
      { echo "$as_me: error: invalid package name: $ac_package" >&2
   { (exit 1); exit 1; }; }
    ac_package=`echo $ac_package | sed 's/[-.]/_/g'`
    eval with_$ac_package=no ;;

  --x)
    # Obsolete; use --with-x.
    with_x=yes ;;

  -x-includes | --x-includes | --x-include | --x-includ | --x-inclu \
  | --x-incl | --x-inc | --x-in | --x-i)
    ac_prev=x_includes ;;
  -x-includes=* | --x-includes=* | --x-include=* | --x-includ=* | --x-inclu=* \
  | --x-incl=* | --x-inc=* | --x-in=* | --x-i=*)
    x_includes=$ac_optarg ;;

  -x-libraries | --x-libraries | --x-librarie | --x-librari \
  | --x-librar | --x-libra | --x-libr | --x-lib | --x-li | --x-l)
    ac_prev=x_libraries ;;
  -x-libraries=* | --x-libraries=* | --x-librarie=* | --x-librari=* \
  | --x-librar=* | --x-libra=* | --x-libr=* | --x-lib=* | --x-li=* | --x-l=*)
    x_libraries=$ac_optarg ;;

  -*) { echo "$as_me: error: unrecognized option: $ac_option
Try \`$0 --help' for more information." >&2
   { (exit 1); exit 1; }; }
    ;;

  *=*)
    ac_envvar=`expr "x$ac_option" : 'x\([^=]*\)='`
    # Reject names that are not valid shell variable names.
    expr "x$ac_envvar" : ".*[^_$as_cr_alnum]" >/dev/null &&
      { echo "$as_me: error: invalid variable name: $ac_envvar" >&2
   { (exit 1); exit 1; }; }
    eval $ac_envvar=\$ac_optarg
    export $ac_envvar ;;

  *)
    # FIXME: should be removed in autoconf 3.0.
    echo "$as_me: WARNING: you should use --build, --host, --target" >&2
    expr "x$ac_option" : ".*[^-._$as_cr_alnum]" >/dev/null &&
      echo "$as_me: WARNING: invalid host type: $ac_option" >&2
    : ${build_alias=$ac_option} ${host_alias=$ac_option} ${target_alias=$ac_option}
    ;;

  esac
done

if test -n "$ac_prev"; then
  ac_option=--`echo $ac_prev | sed 's/_/-/g'`
  { echo "$as_me: error: missing argument to $ac_option" >&2
   { (exit 1); exit 1; }; }
fi

# Be sure to have absolute directory names.
for ac_var in	exec_prefix prefix bindir sbindir libexecdir datarootdir \
		datadir sysconfdir sharedstatedir localstatedir includedir \
		oldincludedir docdir infodir htmldir dvidir pdfdir psdir \
		libdir localedir mandir
do
  eval ac_val=\$$ac_var
  case $ac_val in
    [\\/$]* | ?:[\\/]* )  continue;;
    NONE | '' ) case $ac_var in *prefix ) continue;; esac;;
  esac
  { echo "$as_me: error: expected an absolute directory name for --$ac_var: $ac_val" >&2
   { (exit 1); exit 1; }; }
done

# There might be people who depend on the old broken behavior: `$host'
# used to hold the argument of --host etc.
# FIXME: To remove some day.
build=$build_alias
host=$host_alias
target=$target_alias

# FIXME: To remove some day.
if test "x$host_alias" != x; then
  if test "x$build_alias" = x; then
    cross_compiling=maybe
    echo "$as_me: WARNING: If you wanted to set the --build type, don't use --host.
    If a cross compiler is detected then cross compile mode will be used." >&2
  elif test "x$build_alias" != "x$host_alias"; then
    cross_compiling=yes
  fi
fi

ac_tool_prefix=
test -n "$host_alias" && ac_tool_prefix=$host_alias-

test "$silent" = yes && exec 6>/dev/null


ac_pwd=`pwd` && test -n "$ac_pwd" &&
ac_ls_di=`ls -di .` &&
ac_pwd_ls_di=`cd "$ac_pwd" && ls -di .` ||
  { echo "$as_me: error: Working directory cannot be determined" >&2
   { (exit 1); exit 1; }; }
test "X$ac_ls_di" = "X$ac_pwd_ls_di" ||
  { echo "$as_me: error: pwd does not report name of working directory" >&2
   { (exit 1); exit 1; }; }


# Find the source files, if location was not specified.
if test -z "$srcdir"; then
  ac_srcdir_defaulted=yes
  # Try the directory containing this script, then the parent directory.
  ac_confdir=`$as_dirname -- "$0" ||
$as_expr X"$0" : 'X\(.*[^/]\)//*[^/][^/]*/*$' \| \
	 X"$0" : 'X\(//\)[^/]' \| \
	 X"$0" : 'X\(//\)$' \| \
	 X"$0" : 'X\(/\)' \| . 2>/dev/null ||
echo X"$0" |
    sed '/^X\(.*[^/]\)\/\/*[^/][^/]*\/*$/{
	    s//\1/
	    q
	  }
	  /^X\(\/\/\)[^/].*/{
	    s//\1/
	    q
	  }
	  /^X\(\/\/\)$/{
	    s//\1/
	    q
	  }
	  /^X\(\/\).*/{
	    s//\1/
	    q
	  }
	  s/.*/./; q'`
  srcdir=$ac_confdir
  if test ! -r "$srcdir/$ac_unique_file"; then
    srcdir=..
  fi
else
  ac_srcdir_defaulted=no
fi
if test ! -r "$srcdir/$ac_unique_file"; then
  test "$ac_srcdir_defaulted" = yes && srcdir="$ac_confdir or .."
  { echo "$as_me: error: cannot find sources ($ac_unique_file) in $srcdir" >&2
   { (exit 1); exit 1; }; }
fi
ac_msg="sources are in $srcdir, but \`cd $srcdir' does not work"
ac_abs_confdir=`(
	cd "$srcdir" && test -r "./$ac_unique_file" || { echo "$as_me: error: $ac_msg" >&2
   { (exit 1); exit 1; }; }
	pwd)`
# When building in place, set srcdir=.
if test "$ac_abs_confdir" = "$ac_pwd"; then
  srcdir=.
fi
# Remove unnecessary trailing slashes from srcdir.
# Double slashes in file names in object file debugging info
# mess up M-x gdb in Emacs.
case $srcdir in
*/) srcdir=`expr "X$srcdir" : 'X\(.*[^/]\)' \| "X$srcdir" : 'X\(.*\)'`;;
esac
for ac_var in $ac_precious_vars; do
  eval ac_env_${ac_var}_set=\${${ac_var}+set}
  eval ac_env_${ac_var}_value=\$${ac_var}
  eval ac_cv_env_${ac_var}_set=\${${ac_var}+set}
  eval ac_cv_env_${ac_var}_value=\$${ac_var}
done

#
# Report the --help message.
#
if test "$ac_init_help" = "long"; then
  # Omit some internal or obsolete options to make the list less imposing.
  # This message is too long to be a string in the A/UX 3.1 sh.
  cat <<_ACEOF
\`configure' configures this package to adapt to many kinds of systems.

Usage: $0 [OPTION]... [VAR=VALUE]...

To assign environment variables (e.g., CC, CFLAGS...), specify them as
VAR=VALUE.  See below for descriptions of some of the useful variables.

Defaults for the options are specified in brackets.

Configuration:
  -h, --help              display this help and exit
      --help=short        display options specific to this package
      --help=recursive    display the short help of all the included packages
  -V, --version           display version information and exit
  -q, --quiet, --silent   do not print \`checking...' messages
      --cache-file=FILE   cache test results in FILE [disabled]
  -C, --config-cache      alias for \`--cache-file=config.cache'
  -n, --no-create         do not create output files
      --srcdir=DIR        find the sources in DIR [configure dir or \`..']

Installation directories:
  --prefix=PREFIX         install architecture-independent files in PREFIX
			  [$ac_default_prefix]
  --exec-prefix=EPREFIX   install architecture-dependent files in EPREFIX
			  [PREFIX]

By default, \`make install' will install all the files in
\`$ac_default_prefix/bin', \`$ac_default_prefix/lib' etc.  You can specify
an installation prefix other than \`$ac_default_prefix' using \`--prefix',
for instance \`--prefix=\$HOME'.

For better control, use the options below.

Fine tuning of the installation directories:
  --bindir=DIR           user executables [EPREFIX/bin]
  --sbindir=DIR          system admin executables [EPREFIX/sbin]
  --libexecdir=DIR       program executables [EPREFIX/libexec]
  --sysconfdir=DIR       read-only single-machine data [PREFIX/etc]
  --sharedstatedir=DIR   modifiable architecture-independent data [PREFIX/com]
  --localstatedir=DIR    modifiable single-machine data [PREFIX/var]
  --libdir=DIR           object code libraries [EPREFIX/lib]
  --includedir=DIR       C header files [PREFIX/include]
  --oldincludedir=DIR    C header files for non-gcc [/usr/include]
  --datarootdir=DIR      read-only arch.-independent data root [PREFIX/share]
  --datadir=DIR          read-only architecture-independent data [DATAROOTDIR]
  --infodir=DIR          info documentation [DATAROOTDIR/info]
  --localedir=DIR        locale-dependent data [DATAROOTDIR/locale]
  --mandir=DIR           man documentation [DATAROOTDIR/man]
  --docdir=DIR           documentation root [DATAROOTDIR/doc/PACKAGE]
  --htmldir=DIR          html documentation [DOCDIR]
  --dvidir=DIR           dvi documentation [DOCDIR]
  --pdfdir=DIR           pdf documentation [DOCDIR]
  --psdir=DIR            ps documentation [DOCDIR]
_ACEOF

  cat <<\_ACEOF

System types:
  --build=BUILD     configure for building on BUILD [guessed]
  --host=HOST       cross-compile to build programs to run on HOST [BUILD]
_ACEOF
fi

if test -n "$ac_init_help"; then

  cat <<\_ACEOF

Optional Features:
  --disable-FEATURE       do not include FEATURE (same as --enable-FEATURE=no)
  --enable-FEATURE[=ARG]  include FEATURE [ARG=yes]
  --enable-debugging      turns on debugging flags
  --enable-shared         Compile objects with -fPIC to enable the 'make
                          shared' target.
  --enable-verbose        turns on super verbosity
  --enable-profiling      enable gprof profiling

Some influential environment variables:
  F77         Fortran 77 compiler command
  FFLAGS      Fortran 77 compiler flags
  LDFLAGS     linker flags, e.g. -L<lib dir> if you have libraries in a
              nonstandard directory <lib dir>
  LIBS        libraries to pass to the linker, e.g. -l<library>
  FC          Fortran compiler command
  FCFLAGS     Fortran compiler flags
  CXX         C++ compiler command
  CXXFLAGS    C++ compiler flags
  CPPFLAGS    C/C++/Objective C preprocessor flags, e.g. -I<include dir> if
              you have headers in a nonstandard directory <include dir>
  CC          C compiler command
  CFLAGS      C compiler flags
  CPP         C preprocessor

Use these variables to override the choices made by `configure' or to help
it to find libraries and programs with nonstandard names/locations.

_ACEOF
ac_status=$?
fi

if test "$ac_init_help" = "recursive"; then
  # If there are subdirs, report their specific --help.
  for ac_dir in : $ac_subdirs_all; do test "x$ac_dir" = x: && continue
    test -d "$ac_dir" || continue
    ac_builddir=.

case "$ac_dir" in
.) ac_dir_suffix= ac_top_builddir_sub=. ac_top_build_prefix= ;;
*)
  ac_dir_suffix=/`echo "$ac_dir" | sed 's,^\.[\\/],,'`
  # A ".." for each directory in $ac_dir_suffix.
  ac_top_builddir_sub=`echo "$ac_dir_suffix" | sed 's,/[^\\/]*,/..,g;s,/,,'`
  case $ac_top_builddir_sub in
  "") ac_top_builddir_sub=. ac_top_build_prefix= ;;
  *)  ac_top_build_prefix=$ac_top_builddir_sub/ ;;
  esac ;;
esac
ac_abs_top_builddir=$ac_pwd
ac_abs_builddir=$ac_pwd$ac_dir_suffix
# for backward compatibility:
ac_top_builddir=$ac_top_build_prefix

case $srcdir in
  .)  # We are building in place.
    ac_srcdir=.
    ac_top_srcdir=$ac_top_builddir_sub
    ac_abs_top_srcdir=$ac_pwd ;;
  [\\/]* | ?:[\\/]* )  # Absolute name.
    ac_srcdir=$srcdir$ac_dir_suffix;
    ac_top_srcdir=$srcdir
    ac_abs_top_srcdir=$srcdir ;;
  *) # Relative name.
    ac_srcdir=$ac_top_build_prefix$srcdir$ac_dir_suffix
    ac_top_srcdir=$ac_top_build_prefix$srcdir
    ac_abs_top_srcdir=$ac_pwd/$srcdir ;;
esac
ac_abs_srcdir=$ac_abs_top_srcdir$ac_dir_suffix

    cd "$ac_dir" || { ac_status=$?; continue; }
    # Check for guested configure.
    if test -f "$ac_srcdir/configure.gnu"; then
      echo &&
      $SHELL "$ac_srcdir/configure.gnu" --help=recursive
    elif test -f "$ac_srcdir/configure"; then
      echo &&
      $SHELL "$ac_srcdir/configure" --help=recursive
    else
      echo "$as_me: WARNING: no configuration information is in $ac_dir" >&2
    fi || ac_status=$?
    cd "$ac_pwd" || { ac_status=$?; break; }
  done
fi

test -n "$ac_init_help" && exit $ac_status
if $ac_init_version; then
  cat <<\_ACEOF
configure
generated by GNU Autoconf 2.61

Copyright (C) 1992, 1993, 1994, 1995, 1996, 1998, 1999, 2000, 2001,
2002, 2003, 2004, 2005, 2006 Free Software Foundation, Inc.
This configure script is free software; the Free Software Foundation
gives unlimited permission to copy, distribute and modify it.
_ACEOF
  exit
fi
cat >config.log <<_ACEOF
This file contains any messages produced by compilers while
running configure, to aid debugging if configure makes a mistake.

It was created by $as_me, which was
generated by GNU Autoconf 2.61.  Invocation command line was

  $ $0 $@

_ACEOF
exec 5>>config.log
{
cat <<_ASUNAME
## --------- ##
## Platform. ##
## --------- ##

hostname = `(hostname || uname -n) 2>/dev/null | sed 1q`
uname -m = `(uname -m) 2>/dev/null || echo unknown`
uname -r = `(uname -r) 2>/dev/null || echo unknown`
uname -s = `(uname -s) 2>/dev/null || echo unknown`
uname -v = `(uname -v) 2>/dev/null || echo unknown`

/usr/bin/uname -p = `(/usr/bin/uname -p) 2>/dev/null || echo unknown`
/bin/uname -X     = `(/bin/uname -X) 2>/dev/null     || echo unknown`

/bin/arch              = `(/bin/arch) 2>/dev/null              || echo unknown`
/usr/bin/arch -k       = `(/usr/bin/arch -k) 2>/dev/null       || echo unknown`
/usr/convex/getsysinfo = `(/usr/convex/getsysinfo) 2>/dev/null || echo unknown`
/usr/bin/hostinfo      = `(/usr/bin/hostinfo) 2>/dev/null      || echo unknown`
/bin/machine           = `(/bin/machine) 2>/dev/null           || echo unknown`
/usr/bin/oslevel       = `(/usr/bin/oslevel) 2>/dev/null       || echo unknown`
/bin/universe          = `(/bin/universe) 2>/dev/null          || echo unknown`

_ASUNAME

as_save_IFS=$IFS; IFS=$PATH_SEPARATOR
for as_dir in $PATH
do
  IFS=$as_save_IFS
  test -z "$as_dir" && as_dir=.
  echo "PATH: $as_dir"
done
IFS=$as_save_IFS

} >&5

cat >&5 <<_ACEOF


## ----------- ##
## Core tests. ##
## ----------- ##

_ACEOF


# Keep a trace of the command line.
# Strip out --no-create and --no-recursion so they do not pile up.
# Strip out --silent because we don't want to record it for future runs.
# Also quote any args containing shell meta-characters.
# Make two passes to allow for proper duplicate-argument suppression.
ac_configure_args=
ac_configure_args0=
ac_configure_args1=
ac_must_keep_next=false
for ac_pass in 1 2
do
  for ac_arg
  do
    case $ac_arg in
    -no-create | --no-c* | -n | -no-recursion | --no-r*) continue ;;
    -q | -quiet | --quiet | --quie | --qui | --qu | --q \
    | -silent | --silent | --silen | --sile | --sil)
      continue ;;
    *\'*)
      ac_arg=`echo "$ac_arg" | sed "s/'/'\\\\\\\\''/g"` ;;
    esac
    case $ac_pass in
    1) ac_configure_args0="$ac_configure_args0 '$ac_arg'" ;;
    2)
      ac_configure_args1="$ac_configure_args1 '$ac_arg'"
      if test $ac_must_keep_next = true; then
	ac_must_keep_next=false # Got value, back to normal.
      else
	case $ac_arg in
	  *=* | --config-cache | -C | -disable-* | --disable-* \
	  | -enable-* | --enable-* | -gas | --g* | -nfp | --nf* \
	  | -q | -quiet | --q* | -silent | --sil* | -v | -verb* \
	  | -with-* | --with-* | -without-* | --without-* | --x)
	    case "$ac_configure_args0 " in
	      "$ac_configure_args1"*" '$ac_arg' "* ) continue ;;
	    esac
	    ;;
	  -* ) ac_must_keep_next=true ;;
	esac
      fi
      ac_configure_args="$ac_configure_args '$ac_arg'"
      ;;
    esac
  done
done
$as_unset ac_configure_args0 || test "${ac_configure_args0+set}" != set || { ac_configure_args0=; export ac_configure_args0; }
$as_unset ac_configure_args1 || test "${ac_configure_args1+set}" != set || { ac_configure_args1=; export ac_configure_args1; }

# When interrupted or exit'd, cleanup temporary files, and complete
# config.log.  We remove comments because anyway the quotes in there
# would cause problems or look ugly.
# WARNING: Use '\'' to represent an apostrophe within the trap.
# WARNING: Do not start the trap code with a newline, due to a FreeBSD 4.0 bug.
trap 'exit_status=$?
  # Save into config.log some information that might help in debugging.
  {
    echo

    cat <<\_ASBOX
## ---------------- ##
## Cache variables. ##
## ---------------- ##
_ASBOX
    echo
    # The following way of writing the cache mishandles newlines in values,
(
  for ac_var in `(set) 2>&1 | sed -n '\''s/^\([a-zA-Z_][a-zA-Z0-9_]*\)=.*/\1/p'\''`; do
    eval ac_val=\$$ac_var
    case $ac_val in #(
    *${as_nl}*)
      case $ac_var in #(
      *_cv_*) { echo "$as_me:$LINENO: WARNING: Cache variable $ac_var contains a newline." >&5
echo "$as_me: WARNING: Cache variable $ac_var contains a newline." >&2;} ;;
      esac
      case $ac_var in #(
      _ | IFS | as_nl) ;; #(
      *) $as_unset $ac_var ;;
      esac ;;
    esac
  done
  (set) 2>&1 |
    case $as_nl`(ac_space='\'' '\''; set) 2>&1` in #(
    *${as_nl}ac_space=\ *)
      sed -n \
	"s/'\''/'\''\\\\'\'''\''/g;
	  s/^\\([_$as_cr_alnum]*_cv_[_$as_cr_alnum]*\\)=\\(.*\\)/\\1='\''\\2'\''/p"
      ;; #(
    *)
      sed -n "/^[_$as_cr_alnum]*_cv_[_$as_cr_alnum]*=/p"
      ;;
    esac |
    sort
)
    echo

    cat <<\_ASBOX
## ----------------- ##
## Output variables. ##
## ----------------- ##
_ASBOX
    echo
    for ac_var in $ac_subst_vars
    do
      eval ac_val=\$$ac_var
      case $ac_val in
      *\'\''*) ac_val=`echo "$ac_val" | sed "s/'\''/'\''\\\\\\\\'\'''\''/g"`;;
      esac
      echo "$ac_var='\''$ac_val'\''"
    done | sort
    echo

    if test -n "$ac_subst_files"; then
      cat <<\_ASBOX
## ------------------- ##
## File substitutions. ##
## ------------------- ##
_ASBOX
      echo
      for ac_var in $ac_subst_files
      do
	eval ac_val=\$$ac_var
	case $ac_val in
	*\'\''*) ac_val=`echo "$ac_val" | sed "s/'\''/'\''\\\\\\\\'\'''\''/g"`;;
	esac
	echo "$ac_var='\''$ac_val'\''"
      done | sort
      echo
    fi

    if test -s confdefs.h; then
      cat <<\_ASBOX
## ----------- ##
## confdefs.h. ##
## ----------- ##
_ASBOX
      echo
      cat confdefs.h
      echo
    fi
    test "$ac_signal" != 0 &&
      echo "$as_me: caught signal $ac_signal"
    echo "$as_me: exit $exit_status"
  } >&5
  rm -f core *.core core.conftest.* &&
    rm -f -r conftest* confdefs* conf$$* $ac_clean_files &&
    exit $exit_status
' 0
for ac_signal in 1 2 13 15; do
  trap 'ac_signal='$ac_signal'; { (exit 1); exit 1; }' $ac_signal
done
ac_signal=0

# confdefs.h avoids OS command line length limits that DEFS can exceed.
rm -f -r conftest* confdefs.h

# Predefined preprocessor variables.

cat >>confdefs.h <<_ACEOF
#define PACKAGE_NAME "$PACKAGE_NAME"
_ACEOF


cat >>confdefs.h <<_ACEOF
#define PACKAGE_TARNAME "$PACKAGE_TARNAME"
_ACEOF


cat >>confdefs.h <<_ACEOF
#define PACKAGE_VERSION "$PACKAGE_VERSION"
_ACEOF


cat >>confdefs.h <<_ACEOF
#define PACKAGE_STRING "$PACKAGE_STRING"
_ACEOF


cat >>confdefs.h <<_ACEOF
#define PACKAGE_BUGREPORT "$PACKAGE_BUGREPORT"
_ACEOF


# Let the site file select an alternate cache file if it wants to.
# Prefer explicitly selected file to automatically selected ones.
if test -n "$CONFIG_SITE"; then
  set x "$CONFIG_SITE"
elif test "x$prefix" != xNONE; then
  set x "$prefix/share/config.site" "$prefix/etc/config.site"
else
  set x "$ac_default_prefix/share/config.site" \
	"$ac_default_prefix/etc/config.site"
fi
shift
for ac_site_file
do
  if test -r "$ac_site_file"; then
    { echo "$as_me:$LINENO: loading site script $ac_site_file" >&5
echo "$as_me: loading site script $ac_site_file" >&6;}
    sed 's/^/| /' "$ac_site_file" >&5
    . "$ac_site_file"
  fi
done

if test -r "$cache_file"; then
  # Some versions of bash will fail to source /dev/null (special
  # files actually), so we avoid doing that.
  if test -f "$cache_file"; then
    { echo "$as_me:$LINENO: loading cache $cache_file" >&5
echo "$as_me: loading cache $cache_file" >&6;}
    case $cache_file in
      [\\/]* | ?:[\\/]* ) . "$cache_file";;
      *)                      . "./$cache_file";;
    esac
  fi
else
  { echo "$as_me:$LINENO: creating cache $cache_file" >&5
echo "$as_me: creating cache $cache_file" >&6;}
  >$cache_file
fi

# Check that the precious variables saved in the cache have kept the same
# value.
ac_cache_corrupted=false
for ac_var in $ac_precious_vars; do
  eval ac_old_set=\$ac_cv_env_${ac_var}_set
  eval ac_new_set=\$ac_env_${ac_var}_set
  eval ac_old_val=\$ac_cv_env_${ac_var}_value
  eval ac_new_val=\$ac_env_${ac_var}_value
  case $ac_old_set,$ac_new_set in
    set,)
      { echo "$as_me:$LINENO: error: \`$ac_var' was set to \`$ac_old_val' in the previous run" >&5
echo "$as_me: error: \`$ac_var' was set to \`$ac_old_val' in the previous run" >&2;}
      ac_cache_corrupted=: ;;
    ,set)
      { echo "$as_me:$LINENO: error: \`$ac_var' was not set in the previous run" >&5
echo "$as_me: error: \`$ac_var' was not set in the previous run" >&2;}
      ac_cache_corrupted=: ;;
    ,);;
    *)
      if test "x$ac_old_val" != "x$ac_new_val"; then
	{ echo "$as_me:$LINENO: error: \`$ac_var' has changed since the previous run:" >&5
echo "$as_me: error: \`$ac_var' has changed since the previous run:" >&2;}
	{ echo "$as_me:$LINENO:   former value:  $ac_old_val" >&5
echo "$as_me:   former value:  $ac_old_val" >&2;}
	{ echo "$as_me:$LINENO:   current value: $ac_new_val" >&5
echo "$as_me:   current value: $ac_new_val" >&2;}
	ac_cache_corrupted=:
      fi;;
  esac
  # Pass precious variables to config.status.
  if test "$ac_new_set" = set; then
    case $ac_new_val in
    *\'*) ac_arg=$ac_var=`echo "$ac_new_val" | sed "s/'/'\\\\\\\\''/g"` ;;
    *) ac_arg=$ac_var=$ac_new_val ;;
    esac
    case " $ac_configure_args " in
      *" '$ac_arg' "*) ;; # Avoid dups.  Use of quotes ensures accuracy.
      *) ac_configure_args="$ac_configure_args '$ac_arg'" ;;
    esac
  fi
done
if $ac_cache_corrupted; then
  { echo "$as_me:$LINENO: error: changes in the environment can compromise the build" >&5
echo "$as_me: error: changes in the environment can compromise the build" >&2;}
  { { echo "$as_me:$LINENO: error: run \`make distclean' and/or \`rm $cache_file' and start over" >&5
echo "$as_me: error: run \`make distclean' and/or \`rm $cache_file' and start over" >&2;}
   { (exit 1); exit 1; }; }
fi


ac_ext=c
ac_cpp='$CPP $CPPFLAGS'
ac_compile='$CC -c $CFLAGS $CPPFLAGS conftest.$ac_ext >&5'
ac_link='$CC -o conftest$ac_exeext $CFLAGS $CPPFLAGS $LDFLAGS conftest.$ac_ext $LIBS >&5'
ac_compiler_gnu=$ac_cv_c_compiler_gnu


ac_config_headers="$ac_config_headers include/spud_config.h"


# This is to get around some odd behavious of some fortran compilers
FCFLAGS="$FCFLAGS -I/usr/include"

#
# Name spud
#
# Check whether --enable-debugging was given.
if test "${enable_debugging+set}" = set; then
  enableval=$enable_debugging;
fi


# Check system type
ac_aux_dir=
for ac_dir in "$srcdir" "$srcdir/.." "$srcdir/../.."; do
  if test -f "$ac_dir/install-sh"; then
    ac_aux_dir=$ac_dir
    ac_install_sh="$ac_aux_dir/install-sh -c"
    break
  elif test -f "$ac_dir/install.sh"; then
    ac_aux_dir=$ac_dir
    ac_install_sh="$ac_aux_dir/install.sh -c"
    break
  elif test -f "$ac_dir/shtool"; then
    ac_aux_dir=$ac_dir
    ac_install_sh="$ac_aux_dir/shtool install -c"
    break
  fi
done
if test -z "$ac_aux_dir"; then
  { { echo "$as_me:$LINENO: error: cannot find install-sh or install.sh in \"$srcdir\" \"$srcdir/..\" \"$srcdir/../..\"" >&5
echo "$as_me: error: cannot find install-sh or install.sh in \"$srcdir\" \"$srcdir/..\" \"$srcdir/../..\"" >&2;}
   { (exit 1); exit 1; }; }
fi

# These three variables are undocumented and unsupported,
# and are intended to be withdrawn in a future Autoconf release.
# They can cause serious problems if a builder's source tree is in a directory
# whose full name contains unusual characters.
ac_config_guess="$SHELL $ac_aux_dir/config.guess"  # Please don't use this var.
ac_config_sub="$SHELL $ac_aux_dir/config.sub"  # Please don't use this var.
ac_configure="$SHELL $ac_aux_dir/configure"  # Please don't use this var.


# Make sure we can run config.sub.
$SHELL "$ac_aux_dir/config.sub" sun4 >/dev/null 2>&1 ||
  { { echo "$as_me:$LINENO: error: cannot run $SHELL $ac_aux_dir/config.sub" >&5
echo "$as_me: error: cannot run $SHELL $ac_aux_dir/config.sub" >&2;}
   { (exit 1); exit 1; }; }

{ echo "$as_me:$LINENO: checking build system type" >&5
echo $ECHO_N "checking build system type... $ECHO_C" >&6; }
if test "${ac_cv_build+set}" = set; then
  echo $ECHO_N "(cached) $ECHO_C" >&6
else
  ac_build_alias=$build_alias
test "x$ac_build_alias" = x &&
  ac_build_alias=`$SHELL "$ac_aux_dir/config.guess"`
test "x$ac_build_alias" = x &&
  { { echo "$as_me:$LINENO: error: cannot guess build type; you must specify one" >&5
echo "$as_me: error: cannot guess build type; you must specify one" >&2;}
   { (exit 1); exit 1; }; }
ac_cv_build=`$SHELL "$ac_aux_dir/config.sub" $ac_build_alias` ||
  { { echo "$as_me:$LINENO: error: $SHELL $ac_aux_dir/config.sub $ac_build_alias failed" >&5
echo "$as_me: error: $SHELL $ac_aux_dir/config.sub $ac_build_alias failed" >&2;}
   { (exit 1); exit 1; }; }

fi
{ echo "$as_me:$LINENO: result: $ac_cv_build" >&5
echo "${ECHO_T}$ac_cv_build" >&6; }
case $ac_cv_build in
*-*-*) ;;
*) { { echo "$as_me:$LINENO: error: invalid value of canonical build" >&5
echo "$as_me: error: invalid value of canonical build" >&2;}
   { (exit 1); exit 1; }; };;
esac
build=$ac_cv_build
ac_save_IFS=$IFS; IFS='-'
set x $ac_cv_build
shift
build_cpu=$1
build_vendor=$2
shift; shift
# Remember, the first character of IFS is used to create $*,
# except with old shells:
build_os=$*
IFS=$ac_save_IFS
case $build_os in *\ *) build_os=`echo "$build_os" | sed 's/ /-/g'`;; esac


{ echo "$as_me:$LINENO: checking host system type" >&5
echo $ECHO_N "checking host system type... $ECHO_C" >&6; }
if test "${ac_cv_host+set}" = set; then
  echo $ECHO_N "(cached) $ECHO_C" >&6
else
  if test "x$host_alias" = x; then
  ac_cv_host=$ac_cv_build
else
  ac_cv_host=`$SHELL "$ac_aux_dir/config.sub" $host_alias` ||
    { { echo "$as_me:$LINENO: error: $SHELL $ac_aux_dir/config.sub $host_alias failed" >&5
echo "$as_me: error: $SHELL $ac_aux_dir/config.sub $host_alias failed" >&2;}
   { (exit 1); exit 1; }; }
fi

fi
{ echo "$as_me:$LINENO: result: $ac_cv_host" >&5
echo "${ECHO_T}$ac_cv_host" >&6; }
case $ac_cv_host in
*-*-*) ;;
*) { { echo "$as_me:$LINENO: error: invalid value of canonical host" >&5
echo "$as_me: error: invalid value of canonical host" >&2;}
   { (exit 1); exit 1; }; };;
esac
host=$ac_cv_host
ac_save_IFS=$IFS; IFS='-'
set x $ac_cv_host
shift
host_cpu=$1
host_vendor=$2
shift; shift
# Remember, the first character of IFS is used to create $*,
# except with old shells:
host_os=$*
IFS=$ac_save_IFS
case $host_os in *\ *) host_os=`echo "$host_os" | sed 's/ /-/g'`;; esac


# Find compilers
{ echo "$as_me:$LINENO: *** Fishing for legacy fortran compiler." >&5
echo "$as_me: *** Fishing for legacy fortran compiler." >&6;}
ac_ext=f
ac_compile='$F77 -c $FFLAGS conftest.$ac_ext >&5'
ac_link='$F77 -o conftest$ac_exeext $FFLAGS $LDFLAGS conftest.$ac_ext $LIBS >&5'
ac_compiler_gnu=$ac_cv_f77_compiler_gnu
if test -n "$ac_tool_prefix"; then
  for ac_prog in ifort ifc efc sunf95 gfortran pgf95 pathf95 g95 f90
  do
    # Extract the first word of "$ac_tool_prefix$ac_prog", so it can be a program name with args.
set dummy $ac_tool_prefix$ac_prog; ac_word=$2
{ echo "$as_me:$LINENO: checking for $ac_word" >&5
echo $ECHO_N "checking for $ac_word... $ECHO_C" >&6; }
if test "${ac_cv_prog_F77+set}" = set; then
  echo $ECHO_N "(cached) $ECHO_C" >&6
else
  if test -n "$F77"; then
  ac_cv_prog_F77="$F77" # Let the user override the test.
else
as_save_IFS=$IFS; IFS=$PATH_SEPARATOR
for as_dir in $PATH
do
  IFS=$as_save_IFS
  test -z "$as_dir" && as_dir=.
  for ac_exec_ext in '' $ac_executable_extensions; do
  if { test -f "$as_dir/$ac_word$ac_exec_ext" && $as_test_x "$as_dir/$ac_word$ac_exec_ext"; }; then
    ac_cv_prog_F77="$ac_tool_prefix$ac_prog"
    echo "$as_me:$LINENO: found $as_dir/$ac_word$ac_exec_ext" >&5
    break 2
  fi
done
done
IFS=$as_save_IFS

fi
fi
F77=$ac_cv_prog_F77
if test -n "$F77"; then
  { echo "$as_me:$LINENO: result: $F77" >&5
echo "${ECHO_T}$F77" >&6; }
else
  { echo "$as_me:$LINENO: result: no" >&5
echo "${ECHO_T}no" >&6; }
fi


    test -n "$F77" && break
  done
fi
if test -z "$F77"; then
  ac_ct_F77=$F77
  for ac_prog in ifort ifc efc sunf95 gfortran pgf95 pathf95 g95 f90
do
  # Extract the first word of "$ac_prog", so it can be a program name with args.
set dummy $ac_prog; ac_word=$2
{ echo "$as_me:$LINENO: checking for $ac_word" >&5
echo $ECHO_N "checking for $ac_word... $ECHO_C" >&6; }
if test "${ac_cv_prog_ac_ct_F77+set}" = set; then
  echo $ECHO_N "(cached) $ECHO_C" >&6
else
  if test -n "$ac_ct_F77"; then
  ac_cv_prog_ac_ct_F77="$ac_ct_F77" # Let the user override the test.
else
as_save_IFS=$IFS; IFS=$PATH_SEPARATOR
for as_dir in $PATH
do
  IFS=$as_save_IFS
  test -z "$as_dir" && as_dir=.
  for ac_exec_ext in '' $ac_executable_extensions; do
  if { test -f "$as_dir/$ac_word$ac_exec_ext" && $as_test_x "$as_dir/$ac_word$ac_exec_ext"; }; then
    ac_cv_prog_ac_ct_F77="$ac_prog"
    echo "$as_me:$LINENO: found $as_dir/$ac_word$ac_exec_ext" >&5
    break 2
  fi
done
done
IFS=$as_save_IFS

fi
fi
ac_ct_F77=$ac_cv_prog_ac_ct_F77
if test -n "$ac_ct_F77"; then
  { echo "$as_me:$LINENO: result: $ac_ct_F77" >&5
echo "${ECHO_T}$ac_ct_F77" >&6; }
else
  { echo "$as_me:$LINENO: result: no" >&5
echo "${ECHO_T}no" >&6; }
fi


  test -n "$ac_ct_F77" && break
done

  if test "x$ac_ct_F77" = x; then
    F77=""
  else
    case $cross_compiling:$ac_tool_warned in
yes:)
{ echo "$as_me:$LINENO: WARNING: In the future, Autoconf will not detect cross-tools
whose name does not start with the host triplet.  If you think this
configuration is useful to you, please write to autoconf@gnu.org." >&5
echo "$as_me: WARNING: In the future, Autoconf will not detect cross-tools
whose name does not start with the host triplet.  If you think this
configuration is useful to you, please write to autoconf@gnu.org." >&2;}
ac_tool_warned=yes ;;
esac
    F77=$ac_ct_F77
  fi
fi


# Provide some information about the compiler.
echo "$as_me:$LINENO: checking for Fortran 77 compiler version" >&5
ac_compiler=`set X $ac_compile; echo $2`
{ (ac_try="$ac_compiler --version >&5"
case "(($ac_try" in
  *\"* | *\`* | *\\*) ac_try_echo=\$ac_try;;
  *) ac_try_echo=$ac_try;;
esac
eval "echo \"\$as_me:$LINENO: $ac_try_echo\"") >&5
  (eval "$ac_compiler --version >&5") 2>&5
  ac_status=$?
  echo "$as_me:$LINENO: \$? = $ac_status" >&5
  (exit $ac_status); }
{ (ac_try="$ac_compiler -v >&5"
case "(($ac_try" in
  *\"* | *\`* | *\\*) ac_try_echo=\$ac_try;;
  *) ac_try_echo=$ac_try;;
esac
eval "echo \"\$as_me:$LINENO: $ac_try_echo\"") >&5
  (eval "$ac_compiler -v >&5") 2>&5
  ac_status=$?
  echo "$as_me:$LINENO: \$? = $ac_status" >&5
  (exit $ac_status); }
{ (ac_try="$ac_compiler -V >&5"
case "(($ac_try" in
  *\"* | *\`* | *\\*) ac_try_echo=\$ac_try;;
  *) ac_try_echo=$ac_try;;
esac
eval "echo \"\$as_me:$LINENO: $ac_try_echo\"") >&5
  (eval "$ac_compiler -V >&5") 2>&5
  ac_status=$?
  echo "$as_me:$LINENO: \$? = $ac_status" >&5
  (exit $ac_status); }
rm -f a.out

cat >conftest.$ac_ext <<_ACEOF
      program main

      end
_ACEOF
ac_clean_files_save=$ac_clean_files
ac_clean_files="$ac_clean_files a.out a.exe b.out"
# Try to create an executable without -o first, disregard a.out.
# It will help us diagnose broken compilers, and finding out an intuition
# of exeext.
{ echo "$as_me:$LINENO: checking for Fortran 77 compiler default output file name" >&5
echo $ECHO_N "checking for Fortran 77 compiler default output file name... $ECHO_C" >&6; }
ac_link_default=`echo "$ac_link" | sed 's/ -o *conftest[^ ]*//'`
#
# List of possible output files, starting from the most likely.
# The algorithm is not robust to junk in `.', hence go to wildcards (a.*)
# only as a last resort.  b.out is created by i960 compilers.
ac_files='a_out.exe a.exe conftest.exe a.out conftest a.* conftest.* b.out'
#
# The IRIX 6 linker writes into existing files which may not be
# executable, retaining their permissions.  Remove them first so a
# subsequent execution test works.
ac_rmfiles=
for ac_file in $ac_files
do
  case $ac_file in
    *.$ac_ext | *.xcoff | *.tds | *.d | *.pdb | *.xSYM | *.bb | *.bbg | *.map | *.inf | *.o | *.obj ) ;;
    * ) ac_rmfiles="$ac_rmfiles $ac_file";;
  esac
done
rm -f $ac_rmfiles

if { (ac_try="$ac_link_default"
case "(($ac_try" in
  *\"* | *\`* | *\\*) ac_try_echo=\$ac_try;;
  *) ac_try_echo=$ac_try;;
esac
eval "echo \"\$as_me:$LINENO: $ac_try_echo\"") >&5
  (eval "$ac_link_default") 2>&5
  ac_status=$?
  echo "$as_me:$LINENO: \$? = $ac_status" >&5
  (exit $ac_status); }; then
  # Autoconf-2.13 could set the ac_cv_exeext variable to `no'.
# So ignore a value of `no', otherwise this would lead to `EXEEXT = no'
# in a Makefile.  We should not override ac_cv_exeext if it was cached,
# so that the user can short-circuit this test for compilers unknown to
# Autoconf.
for ac_file in $ac_files ''
do
  test -f "$ac_file" || continue
  case $ac_file in
    *.$ac_ext | *.xcoff | *.tds | *.d | *.pdb | *.xSYM | *.bb | *.bbg | *.map | *.inf | *.o | *.obj )
	;;
    [ab].out )
	# We found the default executable, but exeext='' is most
	# certainly right.
	break;;
    *.* )
        if test "${ac_cv_exeext+set}" = set && test "$ac_cv_exeext" != no;
	then :; else
	   ac_cv_exeext=`expr "$ac_file" : '[^.]*\(\..*\)'`
	fi
	# We set ac_cv_exeext here because the later test for it is not
	# safe: cross compilers may not add the suffix if given an `-o'
	# argument, so we may need to know it at that point already.
	# Even if this section looks crufty: it has the advantage of
	# actually working.
	break;;
    * )
	break;;
  esac
done
test "$ac_cv_exeext" = no && ac_cv_exeext=

else
  ac_file=''
fi

{ echo "$as_me:$LINENO: result: $ac_file" >&5
echo "${ECHO_T}$ac_file" >&6; }
if test -z "$ac_file"; then
  echo "$as_me: failed program was:" >&5
sed 's/^/| /' conftest.$ac_ext >&5

{ { echo "$as_me:$LINENO: error: Fortran 77 compiler cannot create executables
See \`config.log' for more details." >&5
echo "$as_me: error: Fortran 77 compiler cannot create executables
See \`config.log' for more details." >&2;}
   { (exit 77); exit 77; }; }
fi

ac_exeext=$ac_cv_exeext

# Check that the compiler produces executables we can run.  If not, either
# the compiler is broken, or we cross compile.
{ echo "$as_me:$LINENO: checking whether the Fortran 77 compiler works" >&5
echo $ECHO_N "checking whether the Fortran 77 compiler works... $ECHO_C" >&6; }
# FIXME: These cross compiler hacks should be removed for Autoconf 3.0
# If not cross compiling, check that we can run a simple program.
if test "$cross_compiling" != yes; then
  if { ac_try='./$ac_file'
  { (case "(($ac_try" in
  *\"* | *\`* | *\\*) ac_try_echo=\$ac_try;;
  *) ac_try_echo=$ac_try;;
esac
eval "echo \"\$as_me:$LINENO: $ac_try_echo\"") >&5
  (eval "$ac_try") 2>&5
  ac_status=$?
  echo "$as_me:$LINENO: \$? = $ac_status" >&5
  (exit $ac_status); }; }; then
    cross_compiling=no
  else
    if test "$cross_compiling" = maybe; then
	cross_compiling=yes
    else
	{ { echo "$as_me:$LINENO: error: cannot run Fortran 77 compiled programs.
If you meant to cross compile, use \`--host'.
See \`config.log' for more details." >&5
echo "$as_me: error: cannot run Fortran 77 compiled programs.
If you meant to cross compile, use \`--host'.
See \`config.log' for more details." >&2;}
   { (exit 1); exit 1; }; }
    fi
  fi
fi
{ echo "$as_me:$LINENO: result: yes" >&5
echo "${ECHO_T}yes" >&6; }

rm -f a.out a.exe conftest$ac_cv_exeext b.out
ac_clean_files=$ac_clean_files_save
# Check that the compiler produces executables we can run.  If not, either
# the compiler is broken, or we cross compile.
{ echo "$as_me:$LINENO: checking whether we are cross compiling" >&5
echo $ECHO_N "checking whether we are cross compiling... $ECHO_C" >&6; }
{ echo "$as_me:$LINENO: result: $cross_compiling" >&5
echo "${ECHO_T}$cross_compiling" >&6; }

{ echo "$as_me:$LINENO: checking for suffix of executables" >&5
echo $ECHO_N "checking for suffix of executables... $ECHO_C" >&6; }
if { (ac_try="$ac_link"
case "(($ac_try" in
  *\"* | *\`* | *\\*) ac_try_echo=\$ac_try;;
  *) ac_try_echo=$ac_try;;
esac
eval "echo \"\$as_me:$LINENO: $ac_try_echo\"") >&5
  (eval "$ac_link") 2>&5
  ac_status=$?
  echo "$as_me:$LINENO: \$? = $ac_status" >&5
  (exit $ac_status); }; then
  # If both `conftest.exe' and `conftest' are `present' (well, observable)
# catch `conftest.exe'.  For instance with Cygwin, `ls conftest' will
# work properly (i.e., refer to `conftest.exe'), while it won't with
# `rm'.
for ac_file in conftest.exe conftest conftest.*; do
  test -f "$ac_file" || continue
  case $ac_file in
    *.$ac_ext | *.xcoff | *.tds | *.d | *.pdb | *.xSYM | *.bb | *.bbg | *.map | *.inf | *.o | *.obj ) ;;
    *.* ) ac_cv_exeext=`expr "$ac_file" : '[^.]*\(\..*\)'`
	  break;;
    * ) break;;
  esac
done
else
  { { echo "$as_me:$LINENO: error: cannot compute suffix of executables: cannot compile and link
See \`config.log' for more details." >&5
echo "$as_me: error: cannot compute suffix of executables: cannot compile and link
See \`config.log' for more details." >&2;}
   { (exit 1); exit 1; }; }
fi

rm -f conftest$ac_cv_exeext
{ echo "$as_me:$LINENO: result: $ac_cv_exeext" >&5
echo "${ECHO_T}$ac_cv_exeext" >&6; }

rm -f conftest.$ac_ext
EXEEXT=$ac_cv_exeext
ac_exeext=$EXEEXT
{ echo "$as_me:$LINENO: checking for suffix of object files" >&5
echo $ECHO_N "checking for suffix of object files... $ECHO_C" >&6; }
if test "${ac_cv_objext+set}" = set; then
  echo $ECHO_N "(cached) $ECHO_C" >&6
else
  cat >conftest.$ac_ext <<_ACEOF
      program main

      end
_ACEOF
rm -f conftest.o conftest.obj
if { (ac_try="$ac_compile"
case "(($ac_try" in
  *\"* | *\`* | *\\*) ac_try_echo=\$ac_try;;
  *) ac_try_echo=$ac_try;;
esac
eval "echo \"\$as_me:$LINENO: $ac_try_echo\"") >&5
  (eval "$ac_compile") 2>&5
  ac_status=$?
  echo "$as_me:$LINENO: \$? = $ac_status" >&5
  (exit $ac_status); }; then
  for ac_file in conftest.o conftest.obj conftest.*; do
  test -f "$ac_file" || continue;
  case $ac_file in
    *.$ac_ext | *.xcoff | *.tds | *.d | *.pdb | *.xSYM | *.bb | *.bbg | *.map | *.inf ) ;;
    *) ac_cv_objext=`expr "$ac_file" : '.*\.\(.*\)'`
       break;;
  esac
done
else
  echo "$as_me: failed program was:" >&5
sed 's/^/| /' conftest.$ac_ext >&5

{ { echo "$as_me:$LINENO: error: cannot compute suffix of object files: cannot compile
See \`config.log' for more details." >&5
echo "$as_me: error: cannot compute suffix of object files: cannot compile
See \`config.log' for more details." >&2;}
   { (exit 1); exit 1; }; }
fi

rm -f conftest.$ac_cv_objext conftest.$ac_ext
fi
{ echo "$as_me:$LINENO: result: $ac_cv_objext" >&5
echo "${ECHO_T}$ac_cv_objext" >&6; }
OBJEXT=$ac_cv_objext
ac_objext=$OBJEXT
# If we don't use `.F' as extension, the preprocessor is not run on the
# input file.  (Note that this only needs to work for GNU compilers.)
ac_save_ext=$ac_ext
ac_ext=F
{ echo "$as_me:$LINENO: checking whether we are using the GNU Fortran 77 compiler" >&5
echo $ECHO_N "checking whether we are using the GNU Fortran 77 compiler... $ECHO_C" >&6; }
if test "${ac_cv_f77_compiler_gnu+set}" = set; then
  echo $ECHO_N "(cached) $ECHO_C" >&6
else
  cat >conftest.$ac_ext <<_ACEOF
      program main
#ifndef __GNUC__
       choke me
#endif

      end
_ACEOF
rm -f conftest.$ac_objext
if { (ac_try="$ac_compile"
case "(($ac_try" in
  *\"* | *\`* | *\\*) ac_try_echo=\$ac_try;;
  *) ac_try_echo=$ac_try;;
esac
eval "echo \"\$as_me:$LINENO: $ac_try_echo\"") >&5
  (eval "$ac_compile") 2>conftest.er1
  ac_status=$?
  grep -v '^ *+' conftest.er1 >conftest.err
  rm -f conftest.er1
  cat conftest.err >&5
  echo "$as_me:$LINENO: \$? = $ac_status" >&5
  (exit $ac_status); } && {
	 test -z "$ac_f77_werror_flag" ||
	 test ! -s conftest.err
       } && test -s conftest.$ac_objext; then
  ac_compiler_gnu=yes
else
  echo "$as_me: failed program was:" >&5
sed 's/^/| /' conftest.$ac_ext >&5

	ac_compiler_gnu=no
fi

rm -f core conftest.err conftest.$ac_objext conftest.$ac_ext
ac_cv_f77_compiler_gnu=$ac_compiler_gnu

fi
{ echo "$as_me:$LINENO: result: $ac_cv_f77_compiler_gnu" >&5
echo "${ECHO_T}$ac_cv_f77_compiler_gnu" >&6; }
ac_ext=$ac_save_ext
ac_test_FFLAGS=${FFLAGS+set}
ac_save_FFLAGS=$FFLAGS
FFLAGS=
{ echo "$as_me:$LINENO: checking whether $F77 accepts -g" >&5
echo $ECHO_N "checking whether $F77 accepts -g... $ECHO_C" >&6; }
if test "${ac_cv_prog_f77_g+set}" = set; then
  echo $ECHO_N "(cached) $ECHO_C" >&6
else
  FFLAGS=-g
cat >conftest.$ac_ext <<_ACEOF
      program main

      end
_ACEOF
rm -f conftest.$ac_objext
if { (ac_try="$ac_compile"
case "(($ac_try" in
  *\"* | *\`* | *\\*) ac_try_echo=\$ac_try;;
  *) ac_try_echo=$ac_try;;
esac
eval "echo \"\$as_me:$LINENO: $ac_try_echo\"") >&5
  (eval "$ac_compile") 2>conftest.er1
  ac_status=$?
  grep -v '^ *+' conftest.er1 >conftest.err
  rm -f conftest.er1
  cat conftest.err >&5
  echo "$as_me:$LINENO: \$? = $ac_status" >&5
  (exit $ac_status); } && {
	 test -z "$ac_f77_werror_flag" ||
	 test ! -s conftest.err
       } && test -s conftest.$ac_objext; then
  ac_cv_prog_f77_g=yes
else
  echo "$as_me: failed program was:" >&5
sed 's/^/| /' conftest.$ac_ext >&5

	ac_cv_prog_f77_g=no
fi

rm -f core conftest.err conftest.$ac_objext conftest.$ac_ext

fi
{ echo "$as_me:$LINENO: result: $ac_cv_prog_f77_g" >&5
echo "${ECHO_T}$ac_cv_prog_f77_g" >&6; }
if test "$ac_test_FFLAGS" = set; then
  FFLAGS=$ac_save_FFLAGS
elif test $ac_cv_prog_f77_g = yes; then
  if test "x$ac_cv_f77_compiler_gnu" = xyes; then
    FFLAGS="-g -O2"
  else
    FFLAGS="-g"
  fi
else
  if test "x$ac_cv_f77_compiler_gnu" = xyes; then
    FFLAGS="-O2"
  else
    FFLAGS=
  fi
fi

G77=`test $ac_compiler_gnu = yes && echo yes`
ac_ext=c
ac_cpp='$CPP $CPPFLAGS'
ac_compile='$CC -c $CFLAGS $CPPFLAGS conftest.$ac_ext >&5'
ac_link='$CC -o conftest$ac_exeext $CFLAGS $CPPFLAGS $LDFLAGS conftest.$ac_ext $LIBS >&5'
ac_compiler_gnu=$ac_cv_c_compiler_gnu


ac_ext=f
ac_compile='$F77 -c $FFLAGS conftest.$ac_ext >&5'
ac_link='$F77 -o conftest$ac_exeext $FFLAGS $LDFLAGS conftest.$ac_ext $LIBS >&5'
ac_compiler_gnu=$ac_cv_f77_compiler_gnu
{ echo "$as_me:$LINENO: checking how to get verbose linking output from $F77" >&5
echo $ECHO_N "checking how to get verbose linking output from $F77... $ECHO_C" >&6; }
if test "${ac_cv_prog_f77_v+set}" = set; then
  echo $ECHO_N "(cached) $ECHO_C" >&6
else
  cat >conftest.$ac_ext <<_ACEOF
      program main

      end
_ACEOF
rm -f conftest.$ac_objext
if { (ac_try="$ac_compile"
case "(($ac_try" in
  *\"* | *\`* | *\\*) ac_try_echo=\$ac_try;;
  *) ac_try_echo=$ac_try;;
esac
eval "echo \"\$as_me:$LINENO: $ac_try_echo\"") >&5
  (eval "$ac_compile") 2>conftest.er1
  ac_status=$?
  grep -v '^ *+' conftest.er1 >conftest.err
  rm -f conftest.er1
  cat conftest.err >&5
  echo "$as_me:$LINENO: \$? = $ac_status" >&5
  (exit $ac_status); } && {
	 test -z "$ac_f77_werror_flag" ||
	 test ! -s conftest.err
       } && test -s conftest.$ac_objext; then
  ac_cv_prog_f77_v=
# Try some options frequently used verbose output
for ac_verb in -v -verbose --verbose -V -\#\#\#; do
  cat >conftest.$ac_ext <<_ACEOF
      program main

      end
_ACEOF

# Compile and link our simple test program by passing a flag (argument
# 1 to this macro) to the Fortran compiler in order to get
# "verbose" output that we can then parse for the Fortran linker
# flags.
ac_save_FFLAGS=$FFLAGS
FFLAGS="$FFLAGS $ac_verb"
eval "set x $ac_link"
shift
echo "$as_me:$LINENO: $*" >&5
ac_f77_v_output=`eval $ac_link 5>&1 2>&1 | grep -v 'Driving:'`
echo "$ac_f77_v_output" >&5
FFLAGS=$ac_save_FFLAGS

rm -f conftest*

# On HP/UX there is a line like: "LPATH is: /foo:/bar:/baz" where
# /foo, /bar, and /baz are search directories for the Fortran linker.
# Here, we change these into -L/foo -L/bar -L/baz (and put it first):
ac_f77_v_output="`echo $ac_f77_v_output |
	grep 'LPATH is:' |
	sed 's,.*LPATH is\(: *[^ ]*\).*,\1,;s,: */, -L/,g'` $ac_f77_v_output"

# FIXME: we keep getting bitten by quoted arguments; a more general fix
#        that detects unbalanced quotes in FLIBS should be implemented
#        and (ugh) tested at some point.
case $ac_f77_v_output in
  # If we are using xlf then replace all the commas with spaces.
  *xlfentry*)
    ac_f77_v_output=`echo $ac_f77_v_output | sed 's/,/ /g'` ;;

  # With Intel ifc, ignore the quoted -mGLOB_options_string stuff (quoted
  # $LIBS confuse us, and the libraries appear later in the output anyway).
  *mGLOB_options_string*)
    ac_f77_v_output=`echo $ac_f77_v_output | sed 's/"-mGLOB[^"]*"/ /g'` ;;

  # Portland Group compiler has singly- or doubly-quoted -cmdline argument
  # Singly-quoted arguments were reported for versions 5.2-4 and 6.0-4.
  # Doubly-quoted arguments were reported for "PGF90/x86 Linux/x86 5.0-2".
  *-cmdline\ * | *-ignore\ * | *-def\ *)
    ac_f77_v_output=`echo $ac_f77_v_output | sed "\
        s/-cmdline  *'[^']*'/ /g; s/-cmdline  *\"[^\"]*\"/ /g
        s/-ignore  *'[^']*'/ /g; s/-ignore  *\"[^\"]*\"/ /g
        s/-def  *'[^']*'/ /g; s/-def  *\"[^\"]*\"/ /g"` ;;

  # If we are using Cray Fortran then delete quotes.
  *cft90*)
    ac_f77_v_output=`echo $ac_f77_v_output | sed 's/"//g'` ;;
esac


  # look for -l* and *.a constructs in the output
  for ac_arg in $ac_f77_v_output; do
     case $ac_arg in
        [\\/]*.a | ?:[\\/]*.a | -[lLRu]*)
          ac_cv_prog_f77_v=$ac_verb
          break 2 ;;
     esac
  done
done
if test -z "$ac_cv_prog_f77_v"; then
   { echo "$as_me:$LINENO: WARNING: cannot determine how to obtain linking information from $F77" >&5
echo "$as_me: WARNING: cannot determine how to obtain linking information from $F77" >&2;}
fi
else
  echo "$as_me: failed program was:" >&5
sed 's/^/| /' conftest.$ac_ext >&5

	{ echo "$as_me:$LINENO: WARNING: compilation failed" >&5
echo "$as_me: WARNING: compilation failed" >&2;}
fi

rm -f core conftest.err conftest.$ac_objext conftest.$ac_ext

fi
{ echo "$as_me:$LINENO: result: $ac_cv_prog_f77_v" >&5
echo "${ECHO_T}$ac_cv_prog_f77_v" >&6; }
{ echo "$as_me:$LINENO: checking for Fortran 77 libraries of $F77" >&5
echo $ECHO_N "checking for Fortran 77 libraries of $F77... $ECHO_C" >&6; }
if test "${ac_cv_f77_libs+set}" = set; then
  echo $ECHO_N "(cached) $ECHO_C" >&6
else
  if test "x$FLIBS" != "x"; then
  ac_cv_f77_libs="$FLIBS" # Let the user override the test.
else

cat >conftest.$ac_ext <<_ACEOF
      program main

      end
_ACEOF

# Compile and link our simple test program by passing a flag (argument
# 1 to this macro) to the Fortran compiler in order to get
# "verbose" output that we can then parse for the Fortran linker
# flags.
ac_save_FFLAGS=$FFLAGS
FFLAGS="$FFLAGS $ac_cv_prog_f77_v"
eval "set x $ac_link"
shift
echo "$as_me:$LINENO: $*" >&5
ac_f77_v_output=`eval $ac_link 5>&1 2>&1 | grep -v 'Driving:'`
echo "$ac_f77_v_output" >&5
FFLAGS=$ac_save_FFLAGS

rm -f conftest*

# On HP/UX there is a line like: "LPATH is: /foo:/bar:/baz" where
# /foo, /bar, and /baz are search directories for the Fortran linker.
# Here, we change these into -L/foo -L/bar -L/baz (and put it first):
ac_f77_v_output="`echo $ac_f77_v_output |
	grep 'LPATH is:' |
	sed 's,.*LPATH is\(: *[^ ]*\).*,\1,;s,: */, -L/,g'` $ac_f77_v_output"

# FIXME: we keep getting bitten by quoted arguments; a more general fix
#        that detects unbalanced quotes in FLIBS should be implemented
#        and (ugh) tested at some point.
case $ac_f77_v_output in
  # If we are using xlf then replace all the commas with spaces.
  *xlfentry*)
    ac_f77_v_output=`echo $ac_f77_v_output | sed 's/,/ /g'` ;;

  # With Intel ifc, ignore the quoted -mGLOB_options_string stuff (quoted
  # $LIBS confuse us, and the libraries appear later in the output anyway).
  *mGLOB_options_string*)
    ac_f77_v_output=`echo $ac_f77_v_output | sed 's/"-mGLOB[^"]*"/ /g'` ;;

  # Portland Group compiler has singly- or doubly-quoted -cmdline argument
  # Singly-quoted arguments were reported for versions 5.2-4 and 6.0-4.
  # Doubly-quoted arguments were reported for "PGF90/x86 Linux/x86 5.0-2".
  *-cmdline\ * | *-ignore\ * | *-def\ *)
    ac_f77_v_output=`echo $ac_f77_v_output | sed "\
        s/-cmdline  *'[^']*'/ /g; s/-cmdline  *\"[^\"]*\"/ /g
        s/-ignore  *'[^']*'/ /g; s/-ignore  *\"[^\"]*\"/ /g
        s/-def  *'[^']*'/ /g; s/-def  *\"[^\"]*\"/ /g"` ;;

  # If we are using Cray Fortran then delete quotes.
  *cft90*)
    ac_f77_v_output=`echo $ac_f77_v_output | sed 's/"//g'` ;;
esac


ac_cv_f77_libs=

# Save positional arguments (if any)
ac_save_positional="$@"

set X $ac_f77_v_output
while test $# != 1; do
  shift
  ac_arg=$1
  case $ac_arg in
        [\\/]*.a | ?:[\\/]*.a)
            ac_exists=false
  for ac_i in $ac_cv_f77_libs; do
    if test x"$ac_arg" = x"$ac_i"; then
      ac_exists=true
      break
    fi
  done

  if test x"$ac_exists" = xtrue; then
  :
else
  ac_cv_f77_libs="$ac_cv_f77_libs $ac_arg"
fi

          ;;
        -bI:*)
            ac_exists=false
  for ac_i in $ac_cv_f77_libs; do
    if test x"$ac_arg" = x"$ac_i"; then
      ac_exists=true
      break
    fi
  done

  if test x"$ac_exists" = xtrue; then
  :
else
  if test "$ac_compiler_gnu" = yes; then
  for ac_link_opt in $ac_arg; do
    ac_cv_f77_libs="$ac_cv_f77_libs -Xlinker $ac_link_opt"
  done
else
  ac_cv_f77_libs="$ac_cv_f77_libs $ac_arg"
fi
fi

          ;;
          # Ignore these flags.
        -lang* | -lcrt*.o | -lc | -lgcc* | -lSystem | -libmil | -LANG:=* | -LIST:* | -LNO:*)
          ;;
        -lkernel32)
          test x"$CYGWIN" != xyes && ac_cv_f77_libs="$ac_cv_f77_libs $ac_arg"
          ;;
        -[LRuYz])
          # These flags, when seen by themselves, take an argument.
          # We remove the space between option and argument and re-iterate
          # unless we find an empty arg or a new option (starting with -)
	  case $2 in
	     "" | -*);;
	     *)
		ac_arg="$ac_arg$2"
		shift; shift
		set X $ac_arg "$@"
		;;
	  esac
          ;;
        -YP,*)
          for ac_j in `echo $ac_arg | sed -e 's/-YP,/-L/;s/:/ -L/g'`; do
              ac_exists=false
  for ac_i in $ac_cv_f77_libs; do
    if test x"$ac_j" = x"$ac_i"; then
      ac_exists=true
      break
    fi
  done

  if test x"$ac_exists" = xtrue; then
  :
else
  ac_arg="$ac_arg $ac_j"
                               ac_cv_f77_libs="$ac_cv_f77_libs $ac_j"
fi

          done
          ;;
        -[lLR]*)
            ac_exists=false
  for ac_i in $ac_cv_f77_libs; do
    if test x"$ac_arg" = x"$ac_i"; then
      ac_exists=true
      break
    fi
  done

  if test x"$ac_exists" = xtrue; then
  :
else
  ac_cv_f77_libs="$ac_cv_f77_libs $ac_arg"
fi

          ;;
	-zallextract*| -zdefaultextract)
	  ac_cv_f77_libs="$ac_cv_f77_libs $ac_arg"
	  ;;
          # Ignore everything else.
  esac
done
# restore positional arguments
set X $ac_save_positional; shift

# We only consider "LD_RUN_PATH" on Solaris systems.  If this is seen,
# then we insist that the "run path" must be an absolute path (i.e. it
# must begin with a "/").
case `(uname -sr) 2>/dev/null` in
   "SunOS 5"*)
      ac_ld_run_path=`echo $ac_f77_v_output |
                        sed -n 's,^.*LD_RUN_PATH *= *\(/[^ ]*\).*$,-R\1,p'`
      test "x$ac_ld_run_path" != x &&
        if test "$ac_compiler_gnu" = yes; then
  for ac_link_opt in $ac_ld_run_path; do
    ac_cv_f77_libs="$ac_cv_f77_libs -Xlinker $ac_link_opt"
  done
else
  ac_cv_f77_libs="$ac_cv_f77_libs $ac_ld_run_path"
fi
      ;;
esac
fi # test "x$[]_AC_LANG_PREFIX[]LIBS" = "x"

fi
{ echo "$as_me:$LINENO: result: $ac_cv_f77_libs" >&5
echo "${ECHO_T}$ac_cv_f77_libs" >&6; }
FLIBS="$ac_cv_f77_libs"


ac_ext=c
ac_cpp='$CPP $CPPFLAGS'
ac_compile='$CC -c $CFLAGS $CPPFLAGS conftest.$ac_ext >&5'
ac_link='$CC -o conftest$ac_exeext $CFLAGS $CPPFLAGS $LDFLAGS conftest.$ac_ext $LIBS >&5'
ac_compiler_gnu=$ac_cv_c_compiler_gnu

fcompiler=`basename $F77`

{ echo "$as_me:$LINENO: *** Fishing for modern Fortran compiler" >&5
echo "$as_me: *** Fishing for modern Fortran compiler" >&6;}
ac_ext=${ac_fc_srcext-f}
ac_compile='$FC -c $FCFLAGS $ac_fcflags_srcext conftest.$ac_ext >&5'
ac_link='$FC -o conftest$ac_exeext $FCFLAGS $LDFLAGS $ac_fcflags_srcext conftest.$ac_ext $LIBS >&5'
ac_compiler_gnu=$ac_cv_fc_compiler_gnu
if test -n "$ac_tool_prefix"; then
  for ac_prog in ifort ifc efc sunf95 gfortran pgf95 pathf95 g95 f90
  do
    # Extract the first word of "$ac_tool_prefix$ac_prog", so it can be a program name with args.
set dummy $ac_tool_prefix$ac_prog; ac_word=$2
{ echo "$as_me:$LINENO: checking for $ac_word" >&5
echo $ECHO_N "checking for $ac_word... $ECHO_C" >&6; }
if test "${ac_cv_prog_FC+set}" = set; then
  echo $ECHO_N "(cached) $ECHO_C" >&6
else
  if test -n "$FC"; then
  ac_cv_prog_FC="$FC" # Let the user override the test.
else
as_save_IFS=$IFS; IFS=$PATH_SEPARATOR
for as_dir in $PATH
do
  IFS=$as_save_IFS
  test -z "$as_dir" && as_dir=.
  for ac_exec_ext in '' $ac_executable_extensions; do
  if { test -f "$as_dir/$ac_word$ac_exec_ext" && $as_test_x "$as_dir/$ac_word$ac_exec_ext"; }; then
    ac_cv_prog_FC="$ac_tool_prefix$ac_prog"
    echo "$as_me:$LINENO: found $as_dir/$ac_word$ac_exec_ext" >&5
    break 2
  fi
done
done
IFS=$as_save_IFS

fi
fi
FC=$ac_cv_prog_FC
if test -n "$FC"; then
  { echo "$as_me:$LINENO: result: $FC" >&5
echo "${ECHO_T}$FC" >&6; }
else
  { echo "$as_me:$LINENO: result: no" >&5
echo "${ECHO_T}no" >&6; }
fi


    test -n "$FC" && break
  done
fi
if test -z "$FC"; then
  ac_ct_FC=$FC
  for ac_prog in ifort ifc efc sunf95 gfortran pgf95 pathf95 g95 f90
do
  # Extract the first word of "$ac_prog", so it can be a program name with args.
set dummy $ac_prog; ac_word=$2
{ echo "$as_me:$LINENO: checking for $ac_word" >&5
echo $ECHO_N "checking for $ac_word... $ECHO_C" >&6; }
if test "${ac_cv_prog_ac_ct_FC+set}" = set; then
  echo $ECHO_N "(cached) $ECHO_C" >&6
else
  if test -n "$ac_ct_FC"; then
  ac_cv_prog_ac_ct_FC="$ac_ct_FC" # Let the user override the test.
else
as_save_IFS=$IFS; IFS=$PATH_SEPARATOR
for as_dir in $PATH
do
  IFS=$as_save_IFS
  test -z "$as_dir" && as_dir=.
  for ac_exec_ext in '' $ac_executable_extensions; do
  if { test -f "$as_dir/$ac_word$ac_exec_ext" && $as_test_x "$as_dir/$ac_word$ac_exec_ext"; }; then
    ac_cv_prog_ac_ct_FC="$ac_prog"
    echo "$as_me:$LINENO: found $as_dir/$ac_word$ac_exec_ext" >&5
    break 2
  fi
done
done
IFS=$as_save_IFS

fi
fi
ac_ct_FC=$ac_cv_prog_ac_ct_FC
if test -n "$ac_ct_FC"; then
  { echo "$as_me:$LINENO: result: $ac_ct_FC" >&5
echo "${ECHO_T}$ac_ct_FC" >&6; }
else
  { echo "$as_me:$LINENO: result: no" >&5
echo "${ECHO_T}no" >&6; }
fi


  test -n "$ac_ct_FC" && break
done

  if test "x$ac_ct_FC" = x; then
    FC=""
  else
    case $cross_compiling:$ac_tool_warned in
yes:)
{ echo "$as_me:$LINENO: WARNING: In the future, Autoconf will not detect cross-tools
whose name does not start with the host triplet.  If you think this
configuration is useful to you, please write to autoconf@gnu.org." >&5
echo "$as_me: WARNING: In the future, Autoconf will not detect cross-tools
whose name does not start with the host triplet.  If you think this
configuration is useful to you, please write to autoconf@gnu.org." >&2;}
ac_tool_warned=yes ;;
esac
    FC=$ac_ct_FC
  fi
fi


# Provide some information about the compiler.
echo "$as_me:$LINENO: checking for Fortran compiler version" >&5
ac_compiler=`set X $ac_compile; echo $2`
{ (ac_try="$ac_compiler --version >&5"
case "(($ac_try" in
  *\"* | *\`* | *\\*) ac_try_echo=\$ac_try;;
  *) ac_try_echo=$ac_try;;
esac
eval "echo \"\$as_me:$LINENO: $ac_try_echo\"") >&5
  (eval "$ac_compiler --version >&5") 2>&5
  ac_status=$?
  echo "$as_me:$LINENO: \$? = $ac_status" >&5
  (exit $ac_status); }
{ (ac_try="$ac_compiler -v >&5"
case "(($ac_try" in
  *\"* | *\`* | *\\*) ac_try_echo=\$ac_try;;
  *) ac_try_echo=$ac_try;;
esac
eval "echo \"\$as_me:$LINENO: $ac_try_echo\"") >&5
  (eval "$ac_compiler -v >&5") 2>&5
  ac_status=$?
  echo "$as_me:$LINENO: \$? = $ac_status" >&5
  (exit $ac_status); }
{ (ac_try="$ac_compiler -V >&5"
case "(($ac_try" in
  *\"* | *\`* | *\\*) ac_try_echo=\$ac_try;;
  *) ac_try_echo=$ac_try;;
esac
eval "echo \"\$as_me:$LINENO: $ac_try_echo\"") >&5
  (eval "$ac_compiler -V >&5") 2>&5
  ac_status=$?
  echo "$as_me:$LINENO: \$? = $ac_status" >&5
  (exit $ac_status); }
rm -f a.out

# If we don't use `.F' as extension, the preprocessor is not run on the
# input file.  (Note that this only needs to work for GNU compilers.)
ac_save_ext=$ac_ext
ac_ext=F
{ echo "$as_me:$LINENO: checking whether we are using the GNU Fortran compiler" >&5
echo $ECHO_N "checking whether we are using the GNU Fortran compiler... $ECHO_C" >&6; }
if test "${ac_cv_fc_compiler_gnu+set}" = set; then
  echo $ECHO_N "(cached) $ECHO_C" >&6
else
  cat >conftest.$ac_ext <<_ACEOF
      program main
#ifndef __GNUC__
       choke me
#endif

      end
_ACEOF
rm -f conftest.$ac_objext
if { (ac_try="$ac_compile"
case "(($ac_try" in
  *\"* | *\`* | *\\*) ac_try_echo=\$ac_try;;
  *) ac_try_echo=$ac_try;;
esac
eval "echo \"\$as_me:$LINENO: $ac_try_echo\"") >&5
  (eval "$ac_compile") 2>conftest.er1
  ac_status=$?
  grep -v '^ *+' conftest.er1 >conftest.err
  rm -f conftest.er1
  cat conftest.err >&5
  echo "$as_me:$LINENO: \$? = $ac_status" >&5
  (exit $ac_status); } && {
	 test -z "$ac_fc_werror_flag" ||
	 test ! -s conftest.err
       } && test -s conftest.$ac_objext; then
  ac_compiler_gnu=yes
else
  echo "$as_me: failed program was:" >&5
sed 's/^/| /' conftest.$ac_ext >&5

	ac_compiler_gnu=no
fi

rm -f core conftest.err conftest.$ac_objext conftest.$ac_ext
ac_cv_fc_compiler_gnu=$ac_compiler_gnu

fi
{ echo "$as_me:$LINENO: result: $ac_cv_fc_compiler_gnu" >&5
echo "${ECHO_T}$ac_cv_fc_compiler_gnu" >&6; }
ac_ext=$ac_save_ext
ac_test_FFLAGS=${FCFLAGS+set}
ac_save_FFLAGS=$FCFLAGS
FCFLAGS=
{ echo "$as_me:$LINENO: checking whether $FC accepts -g" >&5
echo $ECHO_N "checking whether $FC accepts -g... $ECHO_C" >&6; }
if test "${ac_cv_prog_fc_g+set}" = set; then
  echo $ECHO_N "(cached) $ECHO_C" >&6
else
  FCFLAGS=-g
cat >conftest.$ac_ext <<_ACEOF
      program main

      end
_ACEOF
rm -f conftest.$ac_objext
if { (ac_try="$ac_compile"
case "(($ac_try" in
  *\"* | *\`* | *\\*) ac_try_echo=\$ac_try;;
  *) ac_try_echo=$ac_try;;
esac
eval "echo \"\$as_me:$LINENO: $ac_try_echo\"") >&5
  (eval "$ac_compile") 2>conftest.er1
  ac_status=$?
  grep -v '^ *+' conftest.er1 >conftest.err
  rm -f conftest.er1
  cat conftest.err >&5
  echo "$as_me:$LINENO: \$? = $ac_status" >&5
  (exit $ac_status); } && {
	 test -z "$ac_fc_werror_flag" ||
	 test ! -s conftest.err
       } && test -s conftest.$ac_objext; then
  ac_cv_prog_fc_g=yes
else
  echo "$as_me: failed program was:" >&5
sed 's/^/| /' conftest.$ac_ext >&5

	ac_cv_prog_fc_g=no
fi

rm -f core conftest.err conftest.$ac_objext conftest.$ac_ext

fi
{ echo "$as_me:$LINENO: result: $ac_cv_prog_fc_g" >&5
echo "${ECHO_T}$ac_cv_prog_fc_g" >&6; }
if test "$ac_test_FFLAGS" = set; then
  FCFLAGS=$ac_save_FFLAGS
elif test $ac_cv_prog_fc_g = yes; then
  if test "x$ac_cv_fc_compiler_gnu" = xyes; then
    FCFLAGS="-g -O2"
  else
    FCFLAGS="-g"
  fi
else
  if test "x$ac_cv_fc_compiler_gnu" = xyes; then
    FCFLAGS="-O2"
  else
    FCFLAGS=
  fi
fi

ac_ext=c
ac_cpp='$CPP $CPPFLAGS'
ac_compile='$CC -c $CFLAGS $CPPFLAGS conftest.$ac_ext >&5'
ac_link='$CC -o conftest$ac_exeext $CFLAGS $CPPFLAGS $LDFLAGS conftest.$ac_ext $LIBS >&5'
ac_compiler_gnu=$ac_cv_c_compiler_gnu


ac_ext=${ac_fc_srcext-f}
ac_compile='$FC -c $FCFLAGS $ac_fcflags_srcext conftest.$ac_ext >&5'
ac_link='$FC -o conftest$ac_exeext $FCFLAGS $LDFLAGS $ac_fcflags_srcext conftest.$ac_ext $LIBS >&5'
ac_compiler_gnu=$ac_cv_fc_compiler_gnu
{ echo "$as_me:$LINENO: checking how to get verbose linking output from $FC" >&5
echo $ECHO_N "checking how to get verbose linking output from $FC... $ECHO_C" >&6; }
if test "${ac_cv_prog_fc_v+set}" = set; then
  echo $ECHO_N "(cached) $ECHO_C" >&6
else
  cat >conftest.$ac_ext <<_ACEOF
      program main

      end
_ACEOF
rm -f conftest.$ac_objext
if { (ac_try="$ac_compile"
case "(($ac_try" in
  *\"* | *\`* | *\\*) ac_try_echo=\$ac_try;;
  *) ac_try_echo=$ac_try;;
esac
eval "echo \"\$as_me:$LINENO: $ac_try_echo\"") >&5
  (eval "$ac_compile") 2>conftest.er1
  ac_status=$?
  grep -v '^ *+' conftest.er1 >conftest.err
  rm -f conftest.er1
  cat conftest.err >&5
  echo "$as_me:$LINENO: \$? = $ac_status" >&5
  (exit $ac_status); } && {
	 test -z "$ac_fc_werror_flag" ||
	 test ! -s conftest.err
       } && test -s conftest.$ac_objext; then
  ac_cv_prog_fc_v=
# Try some options frequently used verbose output
for ac_verb in -v -verbose --verbose -V -\#\#\#; do
  cat >conftest.$ac_ext <<_ACEOF
      program main

      end
_ACEOF

# Compile and link our simple test program by passing a flag (argument
# 1 to this macro) to the Fortran compiler in order to get
# "verbose" output that we can then parse for the Fortran linker
# flags.
ac_save_FFLAGS=$FCFLAGS
FCFLAGS="$FCFLAGS $ac_verb"
eval "set x $ac_link"
shift
echo "$as_me:$LINENO: $*" >&5
ac_fc_v_output=`eval $ac_link 5>&1 2>&1 | grep -v 'Driving:'`
echo "$ac_fc_v_output" >&5
FCFLAGS=$ac_save_FFLAGS

rm -f conftest*

# On HP/UX there is a line like: "LPATH is: /foo:/bar:/baz" where
# /foo, /bar, and /baz are search directories for the Fortran linker.
# Here, we change these into -L/foo -L/bar -L/baz (and put it first):
ac_fc_v_output="`echo $ac_fc_v_output |
	grep 'LPATH is:' |
	sed 's,.*LPATH is\(: *[^ ]*\).*,\1,;s,: */, -L/,g'` $ac_fc_v_output"

# FIXME: we keep getting bitten by quoted arguments; a more general fix
#        that detects unbalanced quotes in FLIBS should be implemented
#        and (ugh) tested at some point.
case $ac_fc_v_output in
  # If we are using xlf then replace all the commas with spaces.
  *xlfentry*)
    ac_fc_v_output=`echo $ac_fc_v_output | sed 's/,/ /g'` ;;

  # With Intel ifc, ignore the quoted -mGLOB_options_string stuff (quoted
  # $LIBS confuse us, and the libraries appear later in the output anyway).
  *mGLOB_options_string*)
    ac_fc_v_output=`echo $ac_fc_v_output | sed 's/"-mGLOB[^"]*"/ /g'` ;;

  # Portland Group compiler has singly- or doubly-quoted -cmdline argument
  # Singly-quoted arguments were reported for versions 5.2-4 and 6.0-4.
  # Doubly-quoted arguments were reported for "PGF90/x86 Linux/x86 5.0-2".
  *-cmdline\ * | *-ignore\ * | *-def\ *)
    ac_fc_v_output=`echo $ac_fc_v_output | sed "\
        s/-cmdline  *'[^']*'/ /g; s/-cmdline  *\"[^\"]*\"/ /g
        s/-ignore  *'[^']*'/ /g; s/-ignore  *\"[^\"]*\"/ /g
        s/-def  *'[^']*'/ /g; s/-def  *\"[^\"]*\"/ /g"` ;;

  # If we are using Cray Fortran then delete quotes.
  *cft90*)
    ac_fc_v_output=`echo $ac_fc_v_output | sed 's/"//g'` ;;
esac


  # look for -l* and *.a constructs in the output
  for ac_arg in $ac_fc_v_output; do
     case $ac_arg in
        [\\/]*.a | ?:[\\/]*.a | -[lLRu]*)
          ac_cv_prog_fc_v=$ac_verb
          break 2 ;;
     esac
  done
done
if test -z "$ac_cv_prog_fc_v"; then
   { echo "$as_me:$LINENO: WARNING: cannot determine how to obtain linking information from $FC" >&5
echo "$as_me: WARNING: cannot determine how to obtain linking information from $FC" >&2;}
fi
else
  echo "$as_me: failed program was:" >&5
sed 's/^/| /' conftest.$ac_ext >&5

	{ echo "$as_me:$LINENO: WARNING: compilation failed" >&5
echo "$as_me: WARNING: compilation failed" >&2;}
fi

rm -f core conftest.err conftest.$ac_objext conftest.$ac_ext

fi
{ echo "$as_me:$LINENO: result: $ac_cv_prog_fc_v" >&5
echo "${ECHO_T}$ac_cv_prog_fc_v" >&6; }
{ echo "$as_me:$LINENO: checking for Fortran libraries of $FC" >&5
echo $ECHO_N "checking for Fortran libraries of $FC... $ECHO_C" >&6; }
if test "${ac_cv_fc_libs+set}" = set; then
  echo $ECHO_N "(cached) $ECHO_C" >&6
else
  if test "x$FCLIBS" != "x"; then
  ac_cv_fc_libs="$FCLIBS" # Let the user override the test.
else

cat >conftest.$ac_ext <<_ACEOF
      program main

      end
_ACEOF

# Compile and link our simple test program by passing a flag (argument
# 1 to this macro) to the Fortran compiler in order to get
# "verbose" output that we can then parse for the Fortran linker
# flags.
ac_save_FFLAGS=$FCFLAGS
FCFLAGS="$FCFLAGS $ac_cv_prog_fc_v"
eval "set x $ac_link"
shift
echo "$as_me:$LINENO: $*" >&5
ac_fc_v_output=`eval $ac_link 5>&1 2>&1 | grep -v 'Driving:'`
echo "$ac_fc_v_output" >&5
FCFLAGS=$ac_save_FFLAGS

rm -f conftest*

# On HP/UX there is a line like: "LPATH is: /foo:/bar:/baz" where
# /foo, /bar, and /baz are search directories for the Fortran linker.
# Here, we change these into -L/foo -L/bar -L/baz (and put it first):
ac_fc_v_output="`echo $ac_fc_v_output |
	grep 'LPATH is:' |
	sed 's,.*LPATH is\(: *[^ ]*\).*,\1,;s,: */, -L/,g'` $ac_fc_v_output"

# FIXME: we keep getting bitten by quoted arguments; a more general fix
#        that detects unbalanced quotes in FLIBS should be implemented
#        and (ugh) tested at some point.
case $ac_fc_v_output in
  # If we are using xlf then replace all the commas with spaces.
  *xlfentry*)
    ac_fc_v_output=`echo $ac_fc_v_output | sed 's/,/ /g'` ;;

  # With Intel ifc, ignore the quoted -mGLOB_options_string stuff (quoted
  # $LIBS confuse us, and the libraries appear later in the output anyway).
  *mGLOB_options_string*)
    ac_fc_v_output=`echo $ac_fc_v_output | sed 's/"-mGLOB[^"]*"/ /g'` ;;

  # Portland Group compiler has singly- or doubly-quoted -cmdline argument
  # Singly-quoted arguments were reported for versions 5.2-4 and 6.0-4.
  # Doubly-quoted arguments were reported for "PGF90/x86 Linux/x86 5.0-2".
  *-cmdline\ * | *-ignore\ * | *-def\ *)
    ac_fc_v_output=`echo $ac_fc_v_output | sed "\
        s/-cmdline  *'[^']*'/ /g; s/-cmdline  *\"[^\"]*\"/ /g
        s/-ignore  *'[^']*'/ /g; s/-ignore  *\"[^\"]*\"/ /g
        s/-def  *'[^']*'/ /g; s/-def  *\"[^\"]*\"/ /g"` ;;

  # If we are using Cray Fortran then delete quotes.
  *cft90*)
    ac_fc_v_output=`echo $ac_fc_v_output | sed 's/"//g'` ;;
esac


ac_cv_fc_libs=

# Save positional arguments (if any)
ac_save_positional="$@"

set X $ac_fc_v_output
while test $# != 1; do
  shift
  ac_arg=$1
  case $ac_arg in
        [\\/]*.a | ?:[\\/]*.a)
            ac_exists=false
  for ac_i in $ac_cv_fc_libs; do
    if test x"$ac_arg" = x"$ac_i"; then
      ac_exists=true
      break
    fi
  done

  if test x"$ac_exists" = xtrue; then
  :
else
  ac_cv_fc_libs="$ac_cv_fc_libs $ac_arg"
fi

          ;;
        -bI:*)
            ac_exists=false
  for ac_i in $ac_cv_fc_libs; do
    if test x"$ac_arg" = x"$ac_i"; then
      ac_exists=true
      break
    fi
  done

  if test x"$ac_exists" = xtrue; then
  :
else
  if test "$ac_compiler_gnu" = yes; then
  for ac_link_opt in $ac_arg; do
    ac_cv_fc_libs="$ac_cv_fc_libs -Xlinker $ac_link_opt"
  done
else
  ac_cv_fc_libs="$ac_cv_fc_libs $ac_arg"
fi
fi

          ;;
          # Ignore these flags.
        -lang* | -lcrt*.o | -lc | -lgcc* | -lSystem | -libmil | -LANG:=* | -LIST:* | -LNO:*)
          ;;
        -lkernel32)
          test x"$CYGWIN" != xyes && ac_cv_fc_libs="$ac_cv_fc_libs $ac_arg"
          ;;
        -[LRuYz])
          # These flags, when seen by themselves, take an argument.
          # We remove the space between option and argument and re-iterate
          # unless we find an empty arg or a new option (starting with -)
	  case $2 in
	     "" | -*);;
	     *)
		ac_arg="$ac_arg$2"
		shift; shift
		set X $ac_arg "$@"
		;;
	  esac
          ;;
        -YP,*)
          for ac_j in `echo $ac_arg | sed -e 's/-YP,/-L/;s/:/ -L/g'`; do
              ac_exists=false
  for ac_i in $ac_cv_fc_libs; do
    if test x"$ac_j" = x"$ac_i"; then
      ac_exists=true
      break
    fi
  done

  if test x"$ac_exists" = xtrue; then
  :
else
  ac_arg="$ac_arg $ac_j"
                               ac_cv_fc_libs="$ac_cv_fc_libs $ac_j"
fi

          done
          ;;
        -[lLR]*)
            ac_exists=false
  for ac_i in $ac_cv_fc_libs; do
    if test x"$ac_arg" = x"$ac_i"; then
      ac_exists=true
      break
    fi
  done

  if test x"$ac_exists" = xtrue; then
  :
else
  ac_cv_fc_libs="$ac_cv_fc_libs $ac_arg"
fi

          ;;
	-zallextract*| -zdefaultextract)
	  ac_cv_fc_libs="$ac_cv_fc_libs $ac_arg"
	  ;;
          # Ignore everything else.
  esac
done
# restore positional arguments
set X $ac_save_positional; shift

# We only consider "LD_RUN_PATH" on Solaris systems.  If this is seen,
# then we insist that the "run path" must be an absolute path (i.e. it
# must begin with a "/").
case `(uname -sr) 2>/dev/null` in
   "SunOS 5"*)
      ac_ld_run_path=`echo $ac_fc_v_output |
                        sed -n 's,^.*LD_RUN_PATH *= *\(/[^ ]*\).*$,-R\1,p'`
      test "x$ac_ld_run_path" != x &&
        if test "$ac_compiler_gnu" = yes; then
  for ac_link_opt in $ac_ld_run_path; do
    ac_cv_fc_libs="$ac_cv_fc_libs -Xlinker $ac_link_opt"
  done
else
  ac_cv_fc_libs="$ac_cv_fc_libs $ac_ld_run_path"
fi
      ;;
esac
fi # test "x$[]_AC_LANG_PREFIX[]LIBS" = "x"

fi
{ echo "$as_me:$LINENO: result: $ac_cv_fc_libs" >&5
echo "${ECHO_T}$ac_cv_fc_libs" >&6; }
FCLIBS="$ac_cv_fc_libs"


ac_ext=c
ac_cpp='$CPP $CPPFLAGS'
ac_compile='$CC -c $CFLAGS $CPPFLAGS conftest.$ac_ext >&5'
ac_link='$CC -o conftest$ac_exeext $CFLAGS $CPPFLAGS $LDFLAGS conftest.$ac_ext $LIBS >&5'
ac_compiler_gnu=$ac_cv_c_compiler_gnu

fccompiler=`basename $FC`

if test "$fcompiler" = "sunf95" ; then
    MODINC_FLAG="-M"
    FFLAGS="-M../include $FFLAGS"
    FCFLAGS="-M../include $FCFLAGS"
else
    MODINC_FLAG="-I"
fi

if test "$F77" = "$FC" ; then
    smart_fortran="yes"
    { echo "$as_me:$LINENO: *** Assuming that $FC can process both free and fixed form fortran files." >&5
echo "$as_me: *** Assuming that $FC can process both free and fixed form fortran files." >&6;}
else
    { echo "$as_me:$LINENO: *** Assuming that $FC cannot process both free and fixed form fortran files (silly fortran)." >&5
echo "$as_me: *** Assuming that $FC cannot process both free and fixed form fortran files (silly fortran)." >&6;}
    smart_fortran="no"
fi

ac_ext=cpp
ac_cpp='$CXXCPP $CPPFLAGS'
ac_compile='$CXX -c $CXXFLAGS $CPPFLAGS conftest.$ac_ext >&5'
ac_link='$CXX -o conftest$ac_exeext $CXXFLAGS $CPPFLAGS $LDFLAGS conftest.$ac_ext $LIBS >&5'
ac_compiler_gnu=$ac_cv_cxx_compiler_gnu
if test -z "$CXX"; then
  if test -n "$CCC"; then
    CXX=$CCC
  else
    if test -n "$ac_tool_prefix"; then
  for ac_prog in icpc icc ecc sunCC pgCC g++ CC
  do
    # Extract the first word of "$ac_tool_prefix$ac_prog", so it can be a program name with args.
set dummy $ac_tool_prefix$ac_prog; ac_word=$2
{ echo "$as_me:$LINENO: checking for $ac_word" >&5
echo $ECHO_N "checking for $ac_word... $ECHO_C" >&6; }
if test "${ac_cv_prog_CXX+set}" = set; then
  echo $ECHO_N "(cached) $ECHO_C" >&6
else
  if test -n "$CXX"; then
  ac_cv_prog_CXX="$CXX" # Let the user override the test.
else
as_save_IFS=$IFS; IFS=$PATH_SEPARATOR
for as_dir in $PATH
do
  IFS=$as_save_IFS
  test -z "$as_dir" && as_dir=.
  for ac_exec_ext in '' $ac_executable_extensions; do
  if { test -f "$as_dir/$ac_word$ac_exec_ext" && $as_test_x "$as_dir/$ac_word$ac_exec_ext"; }; then
    ac_cv_prog_CXX="$ac_tool_prefix$ac_prog"
    echo "$as_me:$LINENO: found $as_dir/$ac_word$ac_exec_ext" >&5
    break 2
  fi
done
done
IFS=$as_save_IFS

fi
fi
CXX=$ac_cv_prog_CXX
if test -n "$CXX"; then
  { echo "$as_me:$LINENO: result: $CXX" >&5
echo "${ECHO_T}$CXX" >&6; }
else
  { echo "$as_me:$LINENO: result: no" >&5
echo "${ECHO_T}no" >&6; }
fi


    test -n "$CXX" && break
  done
fi
if test -z "$CXX"; then
  ac_ct_CXX=$CXX
  for ac_prog in icpc icc ecc sunCC pgCC g++ CC
do
  # Extract the first word of "$ac_prog", so it can be a program name with args.
set dummy $ac_prog; ac_word=$2
{ echo "$as_me:$LINENO: checking for $ac_word" >&5
echo $ECHO_N "checking for $ac_word... $ECHO_C" >&6; }
if test "${ac_cv_prog_ac_ct_CXX+set}" = set; then
  echo $ECHO_N "(cached) $ECHO_C" >&6
else
  if test -n "$ac_ct_CXX"; then
  ac_cv_prog_ac_ct_CXX="$ac_ct_CXX" # Let the user override the test.
else
as_save_IFS=$IFS; IFS=$PATH_SEPARATOR
for as_dir in $PATH
do
  IFS=$as_save_IFS
  test -z "$as_dir" && as_dir=.
  for ac_exec_ext in '' $ac_executable_extensions; do
  if { test -f "$as_dir/$ac_word$ac_exec_ext" && $as_test_x "$as_dir/$ac_word$ac_exec_ext"; }; then
    ac_cv_prog_ac_ct_CXX="$ac_prog"
    echo "$as_me:$LINENO: found $as_dir/$ac_word$ac_exec_ext" >&5
    break 2
  fi
done
done
IFS=$as_save_IFS

fi
fi
ac_ct_CXX=$ac_cv_prog_ac_ct_CXX
if test -n "$ac_ct_CXX"; then
  { echo "$as_me:$LINENO: result: $ac_ct_CXX" >&5
echo "${ECHO_T}$ac_ct_CXX" >&6; }
else
  { echo "$as_me:$LINENO: result: no" >&5
echo "${ECHO_T}no" >&6; }
fi


  test -n "$ac_ct_CXX" && break
done

  if test "x$ac_ct_CXX" = x; then
    CXX="g++"
  else
    case $cross_compiling:$ac_tool_warned in
yes:)
{ echo "$as_me:$LINENO: WARNING: In the future, Autoconf will not detect cross-tools
whose name does not start with the host triplet.  If you think this
configuration is useful to you, please write to autoconf@gnu.org." >&5
echo "$as_me: WARNING: In the future, Autoconf will not detect cross-tools
whose name does not start with the host triplet.  If you think this
configuration is useful to you, please write to autoconf@gnu.org." >&2;}
ac_tool_warned=yes ;;
esac
    CXX=$ac_ct_CXX
  fi
fi

  fi
fi
# Provide some information about the compiler.
echo "$as_me:$LINENO: checking for C++ compiler version" >&5
ac_compiler=`set X $ac_compile; echo $2`
{ (ac_try="$ac_compiler --version >&5"
case "(($ac_try" in
  *\"* | *\`* | *\\*) ac_try_echo=\$ac_try;;
  *) ac_try_echo=$ac_try;;
esac
eval "echo \"\$as_me:$LINENO: $ac_try_echo\"") >&5
  (eval "$ac_compiler --version >&5") 2>&5
  ac_status=$?
  echo "$as_me:$LINENO: \$? = $ac_status" >&5
  (exit $ac_status); }
{ (ac_try="$ac_compiler -v >&5"
case "(($ac_try" in
  *\"* | *\`* | *\\*) ac_try_echo=\$ac_try;;
  *) ac_try_echo=$ac_try;;
esac
eval "echo \"\$as_me:$LINENO: $ac_try_echo\"") >&5
  (eval "$ac_compiler -v >&5") 2>&5
  ac_status=$?
  echo "$as_me:$LINENO: \$? = $ac_status" >&5
  (exit $ac_status); }
{ (ac_try="$ac_compiler -V >&5"
case "(($ac_try" in
  *\"* | *\`* | *\\*) ac_try_echo=\$ac_try;;
  *) ac_try_echo=$ac_try;;
esac
eval "echo \"\$as_me:$LINENO: $ac_try_echo\"") >&5
  (eval "$ac_compiler -V >&5") 2>&5
  ac_status=$?
  echo "$as_me:$LINENO: \$? = $ac_status" >&5
  (exit $ac_status); }

{ echo "$as_me:$LINENO: checking whether we are using the GNU C++ compiler" >&5
echo $ECHO_N "checking whether we are using the GNU C++ compiler... $ECHO_C" >&6; }
if test "${ac_cv_cxx_compiler_gnu+set}" = set; then
  echo $ECHO_N "(cached) $ECHO_C" >&6
else
  cat >conftest.$ac_ext <<_ACEOF
/* confdefs.h.  */
_ACEOF
cat confdefs.h >>conftest.$ac_ext
cat >>conftest.$ac_ext <<_ACEOF
/* end confdefs.h.  */

int
main ()
{
#ifndef __GNUC__
       choke me
#endif

  ;
  return 0;
}
_ACEOF
rm -f conftest.$ac_objext
if { (ac_try="$ac_compile"
case "(($ac_try" in
  *\"* | *\`* | *\\*) ac_try_echo=\$ac_try;;
  *) ac_try_echo=$ac_try;;
esac
eval "echo \"\$as_me:$LINENO: $ac_try_echo\"") >&5
  (eval "$ac_compile") 2>conftest.er1
  ac_status=$?
  grep -v '^ *+' conftest.er1 >conftest.err
  rm -f conftest.er1
  cat conftest.err >&5
  echo "$as_me:$LINENO: \$? = $ac_status" >&5
  (exit $ac_status); } && {
	 test -z "$ac_cxx_werror_flag" ||
	 test ! -s conftest.err
       } && test -s conftest.$ac_objext; then
  ac_compiler_gnu=yes
else
  echo "$as_me: failed program was:" >&5
sed 's/^/| /' conftest.$ac_ext >&5

	ac_compiler_gnu=no
fi

rm -f core conftest.err conftest.$ac_objext conftest.$ac_ext
ac_cv_cxx_compiler_gnu=$ac_compiler_gnu

fi
{ echo "$as_me:$LINENO: result: $ac_cv_cxx_compiler_gnu" >&5
echo "${ECHO_T}$ac_cv_cxx_compiler_gnu" >&6; }
GXX=`test $ac_compiler_gnu = yes && echo yes`
ac_test_CXXFLAGS=${CXXFLAGS+set}
ac_save_CXXFLAGS=$CXXFLAGS
{ echo "$as_me:$LINENO: checking whether $CXX accepts -g" >&5
echo $ECHO_N "checking whether $CXX accepts -g... $ECHO_C" >&6; }
if test "${ac_cv_prog_cxx_g+set}" = set; then
  echo $ECHO_N "(cached) $ECHO_C" >&6
else
  ac_save_cxx_werror_flag=$ac_cxx_werror_flag
   ac_cxx_werror_flag=yes
   ac_cv_prog_cxx_g=no
   CXXFLAGS="-g"
   cat >conftest.$ac_ext <<_ACEOF
/* confdefs.h.  */
_ACEOF
cat confdefs.h >>conftest.$ac_ext
cat >>conftest.$ac_ext <<_ACEOF
/* end confdefs.h.  */

int
main ()
{

  ;
  return 0;
}
_ACEOF
rm -f conftest.$ac_objext
if { (ac_try="$ac_compile"
case "(($ac_try" in
  *\"* | *\`* | *\\*) ac_try_echo=\$ac_try;;
  *) ac_try_echo=$ac_try;;
esac
eval "echo \"\$as_me:$LINENO: $ac_try_echo\"") >&5
  (eval "$ac_compile") 2>conftest.er1
  ac_status=$?
  grep -v '^ *+' conftest.er1 >conftest.err
  rm -f conftest.er1
  cat conftest.err >&5
  echo "$as_me:$LINENO: \$? = $ac_status" >&5
  (exit $ac_status); } && {
	 test -z "$ac_cxx_werror_flag" ||
	 test ! -s conftest.err
       } && test -s conftest.$ac_objext; then
  ac_cv_prog_cxx_g=yes
else
  echo "$as_me: failed program was:" >&5
sed 's/^/| /' conftest.$ac_ext >&5

	CXXFLAGS=""
      cat >conftest.$ac_ext <<_ACEOF
/* confdefs.h.  */
_ACEOF
cat confdefs.h >>conftest.$ac_ext
cat >>conftest.$ac_ext <<_ACEOF
/* end confdefs.h.  */

int
main ()
{

  ;
  return 0;
}
_ACEOF
rm -f conftest.$ac_objext
if { (ac_try="$ac_compile"
case "(($ac_try" in
  *\"* | *\`* | *\\*) ac_try_echo=\$ac_try;;
  *) ac_try_echo=$ac_try;;
esac
eval "echo \"\$as_me:$LINENO: $ac_try_echo\"") >&5
  (eval "$ac_compile") 2>conftest.er1
  ac_status=$?
  grep -v '^ *+' conftest.er1 >conftest.err
  rm -f conftest.er1
  cat conftest.err >&5
  echo "$as_me:$LINENO: \$? = $ac_status" >&5
  (exit $ac_status); } && {
	 test -z "$ac_cxx_werror_flag" ||
	 test ! -s conftest.err
       } && test -s conftest.$ac_objext; then
  :
else
  echo "$as_me: failed program was:" >&5
sed 's/^/| /' conftest.$ac_ext >&5

	ac_cxx_werror_flag=$ac_save_cxx_werror_flag
	 CXXFLAGS="-g"
	 cat >conftest.$ac_ext <<_ACEOF
/* confdefs.h.  */
_ACEOF
cat confdefs.h >>conftest.$ac_ext
cat >>conftest.$ac_ext <<_ACEOF
/* end confdefs.h.  */

int
main ()
{

  ;
  return 0;
}
_ACEOF
rm -f conftest.$ac_objext
if { (ac_try="$ac_compile"
case "(($ac_try" in
  *\"* | *\`* | *\\*) ac_try_echo=\$ac_try;;
  *) ac_try_echo=$ac_try;;
esac
eval "echo \"\$as_me:$LINENO: $ac_try_echo\"") >&5
  (eval "$ac_compile") 2>conftest.er1
  ac_status=$?
  grep -v '^ *+' conftest.er1 >conftest.err
  rm -f conftest.er1
  cat conftest.err >&5
  echo "$as_me:$LINENO: \$? = $ac_status" >&5
  (exit $ac_status); } && {
	 test -z "$ac_cxx_werror_flag" ||
	 test ! -s conftest.err
       } && test -s conftest.$ac_objext; then
  ac_cv_prog_cxx_g=yes
else
  echo "$as_me: failed program was:" >&5
sed 's/^/| /' conftest.$ac_ext >&5


fi

rm -f core conftest.err conftest.$ac_objext conftest.$ac_ext
fi

rm -f core conftest.err conftest.$ac_objext conftest.$ac_ext
fi

rm -f core conftest.err conftest.$ac_objext conftest.$ac_ext
   ac_cxx_werror_flag=$ac_save_cxx_werror_flag
fi
{ echo "$as_me:$LINENO: result: $ac_cv_prog_cxx_g" >&5
echo "${ECHO_T}$ac_cv_prog_cxx_g" >&6; }
if test "$ac_test_CXXFLAGS" = set; then
  CXXFLAGS=$ac_save_CXXFLAGS
elif test $ac_cv_prog_cxx_g = yes; then
  if test "$GXX" = yes; then
    CXXFLAGS="-g -O2"
  else
    CXXFLAGS="-g"
  fi
else
  if test "$GXX" = yes; then
    CXXFLAGS="-O2"
  else
    CXXFLAGS=
  fi
fi
ac_ext=c
ac_cpp='$CPP $CPPFLAGS'
ac_compile='$CC -c $CFLAGS $CPPFLAGS conftest.$ac_ext >&5'
ac_link='$CC -o conftest$ac_exeext $CFLAGS $CPPFLAGS $LDFLAGS conftest.$ac_ext $LIBS >&5'
ac_compiler_gnu=$ac_cv_c_compiler_gnu

ac_ext=c
ac_cpp='$CPP $CPPFLAGS'
ac_compile='$CC -c $CFLAGS $CPPFLAGS conftest.$ac_ext >&5'
ac_link='$CC -o conftest$ac_exeext $CFLAGS $CPPFLAGS $LDFLAGS conftest.$ac_ext $LIBS >&5'
ac_compiler_gnu=$ac_cv_c_compiler_gnu
if test -n "$ac_tool_prefix"; then
  # Extract the first word of "${ac_tool_prefix}gcc", so it can be a program name with args.
set dummy ${ac_tool_prefix}gcc; ac_word=$2
{ echo "$as_me:$LINENO: checking for $ac_word" >&5
echo $ECHO_N "checking for $ac_word... $ECHO_C" >&6; }
if test "${ac_cv_prog_CC+set}" = set; then
  echo $ECHO_N "(cached) $ECHO_C" >&6
else
  if test -n "$CC"; then
  ac_cv_prog_CC="$CC" # Let the user override the test.
else
as_save_IFS=$IFS; IFS=$PATH_SEPARATOR
for as_dir in $PATH
do
  IFS=$as_save_IFS
  test -z "$as_dir" && as_dir=.
  for ac_exec_ext in '' $ac_executable_extensions; do
  if { test -f "$as_dir/$ac_word$ac_exec_ext" && $as_test_x "$as_dir/$ac_word$ac_exec_ext"; }; then
    ac_cv_prog_CC="${ac_tool_prefix}gcc"
    echo "$as_me:$LINENO: found $as_dir/$ac_word$ac_exec_ext" >&5
    break 2
  fi
done
done
IFS=$as_save_IFS

fi
fi
CC=$ac_cv_prog_CC
if test -n "$CC"; then
  { echo "$as_me:$LINENO: result: $CC" >&5
echo "${ECHO_T}$CC" >&6; }
else
  { echo "$as_me:$LINENO: result: no" >&5
echo "${ECHO_T}no" >&6; }
fi


fi
if test -z "$ac_cv_prog_CC"; then
  ac_ct_CC=$CC
  # Extract the first word of "gcc", so it can be a program name with args.
set dummy gcc; ac_word=$2
{ echo "$as_me:$LINENO: checking for $ac_word" >&5
echo $ECHO_N "checking for $ac_word... $ECHO_C" >&6; }
if test "${ac_cv_prog_ac_ct_CC+set}" = set; then
  echo $ECHO_N "(cached) $ECHO_C" >&6
else
  if test -n "$ac_ct_CC"; then
  ac_cv_prog_ac_ct_CC="$ac_ct_CC" # Let the user override the test.
else
as_save_IFS=$IFS; IFS=$PATH_SEPARATOR
for as_dir in $PATH
do
  IFS=$as_save_IFS
  test -z "$as_dir" && as_dir=.
  for ac_exec_ext in '' $ac_executable_extensions; do
  if { test -f "$as_dir/$ac_word$ac_exec_ext" && $as_test_x "$as_dir/$ac_word$ac_exec_ext"; }; then
    ac_cv_prog_ac_ct_CC="gcc"
    echo "$as_me:$LINENO: found $as_dir/$ac_word$ac_exec_ext" >&5
    break 2
  fi
done
done
IFS=$as_save_IFS

fi
fi
ac_ct_CC=$ac_cv_prog_ac_ct_CC
if test -n "$ac_ct_CC"; then
  { echo "$as_me:$LINENO: result: $ac_ct_CC" >&5
echo "${ECHO_T}$ac_ct_CC" >&6; }
else
  { echo "$as_me:$LINENO: result: no" >&5
echo "${ECHO_T}no" >&6; }
fi

  if test "x$ac_ct_CC" = x; then
    CC=""
  else
    case $cross_compiling:$ac_tool_warned in
yes:)
{ echo "$as_me:$LINENO: WARNING: In the future, Autoconf will not detect cross-tools
whose name does not start with the host triplet.  If you think this
configuration is useful to you, please write to autoconf@gnu.org." >&5
echo "$as_me: WARNING: In the future, Autoconf will not detect cross-tools
whose name does not start with the host triplet.  If you think this
configuration is useful to you, please write to autoconf@gnu.org." >&2;}
ac_tool_warned=yes ;;
esac
    CC=$ac_ct_CC
  fi
else
  CC="$ac_cv_prog_CC"
fi

if test -z "$CC"; then
          if test -n "$ac_tool_prefix"; then
    # Extract the first word of "${ac_tool_prefix}cc", so it can be a program name with args.
set dummy ${ac_tool_prefix}cc; ac_word=$2
{ echo "$as_me:$LINENO: checking for $ac_word" >&5
echo $ECHO_N "checking for $ac_word... $ECHO_C" >&6; }
if test "${ac_cv_prog_CC+set}" = set; then
  echo $ECHO_N "(cached) $ECHO_C" >&6
else
  if test -n "$CC"; then
  ac_cv_prog_CC="$CC" # Let the user override the test.
else
as_save_IFS=$IFS; IFS=$PATH_SEPARATOR
for as_dir in $PATH
do
  IFS=$as_save_IFS
  test -z "$as_dir" && as_dir=.
  for ac_exec_ext in '' $ac_executable_extensions; do
  if { test -f "$as_dir/$ac_word$ac_exec_ext" && $as_test_x "$as_dir/$ac_word$ac_exec_ext"; }; then
    ac_cv_prog_CC="${ac_tool_prefix}cc"
    echo "$as_me:$LINENO: found $as_dir/$ac_word$ac_exec_ext" >&5
    break 2
  fi
done
done
IFS=$as_save_IFS

fi
fi
CC=$ac_cv_prog_CC
if test -n "$CC"; then
  { echo "$as_me:$LINENO: result: $CC" >&5
echo "${ECHO_T}$CC" >&6; }
else
  { echo "$as_me:$LINENO: result: no" >&5
echo "${ECHO_T}no" >&6; }
fi


  fi
fi
if test -z "$CC"; then
  # Extract the first word of "cc", so it can be a program name with args.
set dummy cc; ac_word=$2
{ echo "$as_me:$LINENO: checking for $ac_word" >&5
echo $ECHO_N "checking for $ac_word... $ECHO_C" >&6; }
if test "${ac_cv_prog_CC+set}" = set; then
  echo $ECHO_N "(cached) $ECHO_C" >&6
else
  if test -n "$CC"; then
  ac_cv_prog_CC="$CC" # Let the user override the test.
else
  ac_prog_rejected=no
as_save_IFS=$IFS; IFS=$PATH_SEPARATOR
for as_dir in $PATH
do
  IFS=$as_save_IFS
  test -z "$as_dir" && as_dir=.
  for ac_exec_ext in '' $ac_executable_extensions; do
  if { test -f "$as_dir/$ac_word$ac_exec_ext" && $as_test_x "$as_dir/$ac_word$ac_exec_ext"; }; then
    if test "$as_dir/$ac_word$ac_exec_ext" = "/usr/ucb/cc"; then
       ac_prog_rejected=yes
       continue
     fi
    ac_cv_prog_CC="cc"
    echo "$as_me:$LINENO: found $as_dir/$ac_word$ac_exec_ext" >&5
    break 2
  fi
done
done
IFS=$as_save_IFS

if test $ac_prog_rejected = yes; then
  # We found a bogon in the path, so make sure we never use it.
  set dummy $ac_cv_prog_CC
  shift
  if test $# != 0; then
    # We chose a different compiler from the bogus one.
    # However, it has the same basename, so the bogon will be chosen
    # first if we set CC to just the basename; use the full file name.
    shift
    ac_cv_prog_CC="$as_dir/$ac_word${1+' '}$@"
  fi
fi
fi
fi
CC=$ac_cv_prog_CC
if test -n "$CC"; then
  { echo "$as_me:$LINENO: result: $CC" >&5
echo "${ECHO_T}$CC" >&6; }
else
  { echo "$as_me:$LINENO: result: no" >&5
echo "${ECHO_T}no" >&6; }
fi


fi
if test -z "$CC"; then
  if test -n "$ac_tool_prefix"; then
  for ac_prog in cl.exe
  do
    # Extract the first word of "$ac_tool_prefix$ac_prog", so it can be a program name with args.
set dummy $ac_tool_prefix$ac_prog; ac_word=$2
{ echo "$as_me:$LINENO: checking for $ac_word" >&5
echo $ECHO_N "checking for $ac_word... $ECHO_C" >&6; }
if test "${ac_cv_prog_CC+set}" = set; then
  echo $ECHO_N "(cached) $ECHO_C" >&6
else
  if test -n "$CC"; then
  ac_cv_prog_CC="$CC" # Let the user override the test.
else
as_save_IFS=$IFS; IFS=$PATH_SEPARATOR
for as_dir in $PATH
do
  IFS=$as_save_IFS
  test -z "$as_dir" && as_dir=.
  for ac_exec_ext in '' $ac_executable_extensions; do
  if { test -f "$as_dir/$ac_word$ac_exec_ext" && $as_test_x "$as_dir/$ac_word$ac_exec_ext"; }; then
    ac_cv_prog_CC="$ac_tool_prefix$ac_prog"
    echo "$as_me:$LINENO: found $as_dir/$ac_word$ac_exec_ext" >&5
    break 2
  fi
done
done
IFS=$as_save_IFS

fi
fi
CC=$ac_cv_prog_CC
if test -n "$CC"; then
  { echo "$as_me:$LINENO: result: $CC" >&5
echo "${ECHO_T}$CC" >&6; }
else
  { echo "$as_me:$LINENO: result: no" >&5
echo "${ECHO_T}no" >&6; }
fi


    test -n "$CC" && break
  done
fi
if test -z "$CC"; then
  ac_ct_CC=$CC
  for ac_prog in cl.exe
do
  # Extract the first word of "$ac_prog", so it can be a program name with args.
set dummy $ac_prog; ac_word=$2
{ echo "$as_me:$LINENO: checking for $ac_word" >&5
echo $ECHO_N "checking for $ac_word... $ECHO_C" >&6; }
if test "${ac_cv_prog_ac_ct_CC+set}" = set; then
  echo $ECHO_N "(cached) $ECHO_C" >&6
else
  if test -n "$ac_ct_CC"; then
  ac_cv_prog_ac_ct_CC="$ac_ct_CC" # Let the user override the test.
else
as_save_IFS=$IFS; IFS=$PATH_SEPARATOR
for as_dir in $PATH
do
  IFS=$as_save_IFS
  test -z "$as_dir" && as_dir=.
  for ac_exec_ext in '' $ac_executable_extensions; do
  if { test -f "$as_dir/$ac_word$ac_exec_ext" && $as_test_x "$as_dir/$ac_word$ac_exec_ext"; }; then
    ac_cv_prog_ac_ct_CC="$ac_prog"
    echo "$as_me:$LINENO: found $as_dir/$ac_word$ac_exec_ext" >&5
    break 2
  fi
done
done
IFS=$as_save_IFS

fi
fi
ac_ct_CC=$ac_cv_prog_ac_ct_CC
if test -n "$ac_ct_CC"; then
  { echo "$as_me:$LINENO: result: $ac_ct_CC" >&5
echo "${ECHO_T}$ac_ct_CC" >&6; }
else
  { echo "$as_me:$LINENO: result: no" >&5
echo "${ECHO_T}no" >&6; }
fi


  test -n "$ac_ct_CC" && break
done

  if test "x$ac_ct_CC" = x; then
    CC=""
  else
    case $cross_compiling:$ac_tool_warned in
yes:)
{ echo "$as_me:$LINENO: WARNING: In the future, Autoconf will not detect cross-tools
whose name does not start with the host triplet.  If you think this
configuration is useful to you, please write to autoconf@gnu.org." >&5
echo "$as_me: WARNING: In the future, Autoconf will not detect cross-tools
whose name does not start with the host triplet.  If you think this
configuration is useful to you, please write to autoconf@gnu.org." >&2;}
ac_tool_warned=yes ;;
esac
    CC=$ac_ct_CC
  fi
fi

fi


test -z "$CC" && { { echo "$as_me:$LINENO: error: no acceptable C compiler found in \$PATH
See \`config.log' for more details." >&5
echo "$as_me: error: no acceptable C compiler found in \$PATH
See \`config.log' for more details." >&2;}
   { (exit 1); exit 1; }; }

# Provide some information about the compiler.
echo "$as_me:$LINENO: checking for C compiler version" >&5
ac_compiler=`set X $ac_compile; echo $2`
{ (ac_try="$ac_compiler --version >&5"
case "(($ac_try" in
  *\"* | *\`* | *\\*) ac_try_echo=\$ac_try;;
  *) ac_try_echo=$ac_try;;
esac
eval "echo \"\$as_me:$LINENO: $ac_try_echo\"") >&5
  (eval "$ac_compiler --version >&5") 2>&5
  ac_status=$?
  echo "$as_me:$LINENO: \$? = $ac_status" >&5
  (exit $ac_status); }
{ (ac_try="$ac_compiler -v >&5"
case "(($ac_try" in
  *\"* | *\`* | *\\*) ac_try_echo=\$ac_try;;
  *) ac_try_echo=$ac_try;;
esac
eval "echo \"\$as_me:$LINENO: $ac_try_echo\"") >&5
  (eval "$ac_compiler -v >&5") 2>&5
  ac_status=$?
  echo "$as_me:$LINENO: \$? = $ac_status" >&5
  (exit $ac_status); }
{ (ac_try="$ac_compiler -V >&5"
case "(($ac_try" in
  *\"* | *\`* | *\\*) ac_try_echo=\$ac_try;;
  *) ac_try_echo=$ac_try;;
esac
eval "echo \"\$as_me:$LINENO: $ac_try_echo\"") >&5
  (eval "$ac_compiler -V >&5") 2>&5
  ac_status=$?
  echo "$as_me:$LINENO: \$? = $ac_status" >&5
  (exit $ac_status); }

{ echo "$as_me:$LINENO: checking whether we are using the GNU C compiler" >&5
echo $ECHO_N "checking whether we are using the GNU C compiler... $ECHO_C" >&6; }
if test "${ac_cv_c_compiler_gnu+set}" = set; then
  echo $ECHO_N "(cached) $ECHO_C" >&6
else
  cat >conftest.$ac_ext <<_ACEOF
/* confdefs.h.  */
_ACEOF
cat confdefs.h >>conftest.$ac_ext
cat >>conftest.$ac_ext <<_ACEOF
/* end confdefs.h.  */

int
main ()
{
#ifndef __GNUC__
       choke me
#endif

  ;
  return 0;
}
_ACEOF
rm -f conftest.$ac_objext
if { (ac_try="$ac_compile"
case "(($ac_try" in
  *\"* | *\`* | *\\*) ac_try_echo=\$ac_try;;
  *) ac_try_echo=$ac_try;;
esac
eval "echo \"\$as_me:$LINENO: $ac_try_echo\"") >&5
  (eval "$ac_compile") 2>conftest.er1
  ac_status=$?
  grep -v '^ *+' conftest.er1 >conftest.err
  rm -f conftest.er1
  cat conftest.err >&5
  echo "$as_me:$LINENO: \$? = $ac_status" >&5
  (exit $ac_status); } && {
	 test -z "$ac_c_werror_flag" ||
	 test ! -s conftest.err
       } && test -s conftest.$ac_objext; then
  ac_compiler_gnu=yes
else
  echo "$as_me: failed program was:" >&5
sed 's/^/| /' conftest.$ac_ext >&5

	ac_compiler_gnu=no
fi

rm -f core conftest.err conftest.$ac_objext conftest.$ac_ext
ac_cv_c_compiler_gnu=$ac_compiler_gnu

fi
{ echo "$as_me:$LINENO: result: $ac_cv_c_compiler_gnu" >&5
echo "${ECHO_T}$ac_cv_c_compiler_gnu" >&6; }
GCC=`test $ac_compiler_gnu = yes && echo yes`
ac_test_CFLAGS=${CFLAGS+set}
ac_save_CFLAGS=$CFLAGS
{ echo "$as_me:$LINENO: checking whether $CC accepts -g" >&5
echo $ECHO_N "checking whether $CC accepts -g... $ECHO_C" >&6; }
if test "${ac_cv_prog_cc_g+set}" = set; then
  echo $ECHO_N "(cached) $ECHO_C" >&6
else
  ac_save_c_werror_flag=$ac_c_werror_flag
   ac_c_werror_flag=yes
   ac_cv_prog_cc_g=no
   CFLAGS="-g"
   cat >conftest.$ac_ext <<_ACEOF
/* confdefs.h.  */
_ACEOF
cat confdefs.h >>conftest.$ac_ext
cat >>conftest.$ac_ext <<_ACEOF
/* end confdefs.h.  */

int
main ()
{

  ;
  return 0;
}
_ACEOF
rm -f conftest.$ac_objext
if { (ac_try="$ac_compile"
case "(($ac_try" in
  *\"* | *\`* | *\\*) ac_try_echo=\$ac_try;;
  *) ac_try_echo=$ac_try;;
esac
eval "echo \"\$as_me:$LINENO: $ac_try_echo\"") >&5
  (eval "$ac_compile") 2>conftest.er1
  ac_status=$?
  grep -v '^ *+' conftest.er1 >conftest.err
  rm -f conftest.er1
  cat conftest.err >&5
  echo "$as_me:$LINENO: \$? = $ac_status" >&5
  (exit $ac_status); } && {
	 test -z "$ac_c_werror_flag" ||
	 test ! -s conftest.err
       } && test -s conftest.$ac_objext; then
  ac_cv_prog_cc_g=yes
else
  echo "$as_me: failed program was:" >&5
sed 's/^/| /' conftest.$ac_ext >&5

	CFLAGS=""
      cat >conftest.$ac_ext <<_ACEOF
/* confdefs.h.  */
_ACEOF
cat confdefs.h >>conftest.$ac_ext
cat >>conftest.$ac_ext <<_ACEOF
/* end confdefs.h.  */

int
main ()
{

  ;
  return 0;
}
_ACEOF
rm -f conftest.$ac_objext
if { (ac_try="$ac_compile"
case "(($ac_try" in
  *\"* | *\`* | *\\*) ac_try_echo=\$ac_try;;
  *) ac_try_echo=$ac_try;;
esac
eval "echo \"\$as_me:$LINENO: $ac_try_echo\"") >&5
  (eval "$ac_compile") 2>conftest.er1
  ac_status=$?
  grep -v '^ *+' conftest.er1 >conftest.err
  rm -f conftest.er1
  cat conftest.err >&5
  echo "$as_me:$LINENO: \$? = $ac_status" >&5
  (exit $ac_status); } && {
	 test -z "$ac_c_werror_flag" ||
	 test ! -s conftest.err
       } && test -s conftest.$ac_objext; then
  :
else
  echo "$as_me: failed program was:" >&5
sed 's/^/| /' conftest.$ac_ext >&5

	ac_c_werror_flag=$ac_save_c_werror_flag
	 CFLAGS="-g"
	 cat >conftest.$ac_ext <<_ACEOF
/* confdefs.h.  */
_ACEOF
cat confdefs.h >>conftest.$ac_ext
cat >>conftest.$ac_ext <<_ACEOF
/* end confdefs.h.  */

int
main ()
{

  ;
  return 0;
}
_ACEOF
rm -f conftest.$ac_objext
if { (ac_try="$ac_compile"
case "(($ac_try" in
  *\"* | *\`* | *\\*) ac_try_echo=\$ac_try;;
  *) ac_try_echo=$ac_try;;
esac
eval "echo \"\$as_me:$LINENO: $ac_try_echo\"") >&5
  (eval "$ac_compile") 2>conftest.er1
  ac_status=$?
  grep -v '^ *+' conftest.er1 >conftest.err
  rm -f conftest.er1
  cat conftest.err >&5
  echo "$as_me:$LINENO: \$? = $ac_status" >&5
  (exit $ac_status); } && {
	 test -z "$ac_c_werror_flag" ||
	 test ! -s conftest.err
       } && test -s conftest.$ac_objext; then
  ac_cv_prog_cc_g=yes
else
  echo "$as_me: failed program was:" >&5
sed 's/^/| /' conftest.$ac_ext >&5


fi

rm -f core conftest.err conftest.$ac_objext conftest.$ac_ext
fi

rm -f core conftest.err conftest.$ac_objext conftest.$ac_ext
fi

rm -f core conftest.err conftest.$ac_objext conftest.$ac_ext
   ac_c_werror_flag=$ac_save_c_werror_flag
fi
{ echo "$as_me:$LINENO: result: $ac_cv_prog_cc_g" >&5
echo "${ECHO_T}$ac_cv_prog_cc_g" >&6; }
if test "$ac_test_CFLAGS" = set; then
  CFLAGS=$ac_save_CFLAGS
elif test $ac_cv_prog_cc_g = yes; then
  if test "$GCC" = yes; then
    CFLAGS="-g -O2"
  else
    CFLAGS="-g"
  fi
else
  if test "$GCC" = yes; then
    CFLAGS="-O2"
  else
    CFLAGS=
  fi
fi
{ echo "$as_me:$LINENO: checking for $CC option to accept ISO C89" >&5
echo $ECHO_N "checking for $CC option to accept ISO C89... $ECHO_C" >&6; }
if test "${ac_cv_prog_cc_c89+set}" = set; then
  echo $ECHO_N "(cached) $ECHO_C" >&6
else
  ac_cv_prog_cc_c89=no
ac_save_CC=$CC
cat >conftest.$ac_ext <<_ACEOF
/* confdefs.h.  */
_ACEOF
cat confdefs.h >>conftest.$ac_ext
cat >>conftest.$ac_ext <<_ACEOF
/* end confdefs.h.  */
#include <stdarg.h>
#include <stdio.h>
#include <sys/types.h>
#include <sys/stat.h>
/* Most of the following tests are stolen from RCS 5.7's src/conf.sh.  */
struct buf { int x; };
FILE * (*rcsopen) (struct buf *, struct stat *, int);
static char *e (p, i)
     char **p;
     int i;
{
  return p[i];
}
static char *f (char * (*g) (char **, int), char **p, ...)
{
  char *s;
  va_list v;
  va_start (v,p);
  s = g (p, va_arg (v,int));
  va_end (v);
  return s;
}

/* OSF 4.0 Compaq cc is some sort of almost-ANSI by default.  It has
   function prototypes and stuff, but not '\xHH' hex character constants.
   These don't provoke an error unfortunately, instead are silently treated
   as 'x'.  The following induces an error, until -std is added to get
   proper ANSI mode.  Curiously '\x00'!='x' always comes out true, for an
   array size at least.  It's necessary to write '\x00'==0 to get something
   that's true only with -std.  */
int osf4_cc_array ['\x00' == 0 ? 1 : -1];

/* IBM C 6 for AIX is almost-ANSI by default, but it replaces macro parameters
   inside strings and character constants.  */
#define FOO(x) 'x'
int xlc6_cc_array[FOO(a) == 'x' ? 1 : -1];

int test (int i, double x);
struct s1 {int (*f) (int a);};
struct s2 {int (*f) (double a);};
int pairnames (int, char **, FILE *(*)(struct buf *, struct stat *, int), int, int);
int argc;
char **argv;
int
main ()
{
return f (e, argv, 0) != argv[0]  ||  f (e, argv, 1) != argv[1];
  ;
  return 0;
}
_ACEOF
for ac_arg in '' -qlanglvl=extc89 -qlanglvl=ansi -std \
	-Ae "-Aa -D_HPUX_SOURCE" "-Xc -D__EXTENSIONS__"
do
  CC="$ac_save_CC $ac_arg"
  rm -f conftest.$ac_objext
if { (ac_try="$ac_compile"
case "(($ac_try" in
  *\"* | *\`* | *\\*) ac_try_echo=\$ac_try;;
  *) ac_try_echo=$ac_try;;
esac
eval "echo \"\$as_me:$LINENO: $ac_try_echo\"") >&5
  (eval "$ac_compile") 2>conftest.er1
  ac_status=$?
  grep -v '^ *+' conftest.er1 >conftest.err
  rm -f conftest.er1
  cat conftest.err >&5
  echo "$as_me:$LINENO: \$? = $ac_status" >&5
  (exit $ac_status); } && {
	 test -z "$ac_c_werror_flag" ||
	 test ! -s conftest.err
       } && test -s conftest.$ac_objext; then
  ac_cv_prog_cc_c89=$ac_arg
else
  echo "$as_me: failed program was:" >&5
sed 's/^/| /' conftest.$ac_ext >&5


fi

rm -f core conftest.err conftest.$ac_objext
  test "x$ac_cv_prog_cc_c89" != "xno" && break
done
rm -f conftest.$ac_ext
CC=$ac_save_CC

fi
# AC_CACHE_VAL
case "x$ac_cv_prog_cc_c89" in
  x)
    { echo "$as_me:$LINENO: result: none needed" >&5
echo "${ECHO_T}none needed" >&6; } ;;
  xno)
    { echo "$as_me:$LINENO: result: unsupported" >&5
echo "${ECHO_T}unsupported" >&6; } ;;
  *)
    CC="$CC $ac_cv_prog_cc_c89"
    { echo "$as_me:$LINENO: result: $ac_cv_prog_cc_c89" >&5
echo "${ECHO_T}$ac_cv_prog_cc_c89" >&6; } ;;
esac


ac_ext=c
ac_cpp='$CPP $CPPFLAGS'
ac_compile='$CC -c $CFLAGS $CPPFLAGS conftest.$ac_ext >&5'
ac_link='$CC -o conftest$ac_exeext $CFLAGS $CPPFLAGS $LDFLAGS conftest.$ac_ext $LIBS >&5'
ac_compiler_gnu=$ac_cv_c_compiler_gnu

ac_ext=c
ac_cpp='$CPP $CPPFLAGS'
ac_compile='$CC -c $CFLAGS $CPPFLAGS conftest.$ac_ext >&5'
ac_link='$CC -o conftest$ac_exeext $CFLAGS $CPPFLAGS $LDFLAGS conftest.$ac_ext $LIBS >&5'
ac_compiler_gnu=$ac_cv_c_compiler_gnu
{ echo "$as_me:$LINENO: checking how to run the C preprocessor" >&5
echo $ECHO_N "checking how to run the C preprocessor... $ECHO_C" >&6; }
# On Suns, sometimes $CPP names a directory.
if test -n "$CPP" && test -d "$CPP"; then
  CPP=
fi
if test -z "$CPP"; then
  if test "${ac_cv_prog_CPP+set}" = set; then
  echo $ECHO_N "(cached) $ECHO_C" >&6
else
      # Double quotes because CPP needs to be expanded
    for CPP in "$CC -E" "$CC -E -traditional-cpp" "/lib/cpp"
    do
      ac_preproc_ok=false
for ac_c_preproc_warn_flag in '' yes
do
  # Use a header file that comes with gcc, so configuring glibc
  # with a fresh cross-compiler works.
  # Prefer <limits.h> to <assert.h> if __STDC__ is defined, since
  # <limits.h> exists even on freestanding compilers.
  # On the NeXT, cc -E runs the code through the compiler's parser,
  # not just through cpp. "Syntax error" is here to catch this case.
  cat >conftest.$ac_ext <<_ACEOF
/* confdefs.h.  */
_ACEOF
cat confdefs.h >>conftest.$ac_ext
cat >>conftest.$ac_ext <<_ACEOF
/* end confdefs.h.  */
#ifdef __STDC__
# include <limits.h>
#else
# include <assert.h>
#endif
		     Syntax error
_ACEOF
if { (ac_try="$ac_cpp conftest.$ac_ext"
case "(($ac_try" in
  *\"* | *\`* | *\\*) ac_try_echo=\$ac_try;;
  *) ac_try_echo=$ac_try;;
esac
eval "echo \"\$as_me:$LINENO: $ac_try_echo\"") >&5
  (eval "$ac_cpp conftest.$ac_ext") 2>conftest.er1
  ac_status=$?
  grep -v '^ *+' conftest.er1 >conftest.err
  rm -f conftest.er1
  cat conftest.err >&5
  echo "$as_me:$LINENO: \$? = $ac_status" >&5
  (exit $ac_status); } >/dev/null && {
	 test -z "$ac_c_preproc_warn_flag$ac_c_werror_flag" ||
	 test ! -s conftest.err
       }; then
  :
else
  echo "$as_me: failed program was:" >&5
sed 's/^/| /' conftest.$ac_ext >&5

  # Broken: fails on valid input.
continue
fi

rm -f conftest.err conftest.$ac_ext

  # OK, works on sane cases.  Now check whether nonexistent headers
  # can be detected and how.
  cat >conftest.$ac_ext <<_ACEOF
/* confdefs.h.  */
_ACEOF
cat confdefs.h >>conftest.$ac_ext
cat >>conftest.$ac_ext <<_ACEOF
/* end confdefs.h.  */
#include <ac_nonexistent.h>
_ACEOF
if { (ac_try="$ac_cpp conftest.$ac_ext"
case "(($ac_try" in
  *\"* | *\`* | *\\*) ac_try_echo=\$ac_try;;
  *) ac_try_echo=$ac_try;;
esac
eval "echo \"\$as_me:$LINENO: $ac_try_echo\"") >&5
  (eval "$ac_cpp conftest.$ac_ext") 2>conftest.er1
  ac_status=$?
  grep -v '^ *+' conftest.er1 >conftest.err
  rm -f conftest.er1
  cat conftest.err >&5
  echo "$as_me:$LINENO: \$? = $ac_status" >&5
  (exit $ac_status); } >/dev/null && {
	 test -z "$ac_c_preproc_warn_flag$ac_c_werror_flag" ||
	 test ! -s conftest.err
       }; then
  # Broken: success on invalid input.
continue
else
  echo "$as_me: failed program was:" >&5
sed 's/^/| /' conftest.$ac_ext >&5

  # Passes both tests.
ac_preproc_ok=:
break
fi

rm -f conftest.err conftest.$ac_ext

done
# Because of `break', _AC_PREPROC_IFELSE's cleaning code was skipped.
rm -f conftest.err conftest.$ac_ext
if $ac_preproc_ok; then
  break
fi

    done
    ac_cv_prog_CPP=$CPP

fi
  CPP=$ac_cv_prog_CPP
else
  ac_cv_prog_CPP=$CPP
fi
{ echo "$as_me:$LINENO: result: $CPP" >&5
echo "${ECHO_T}$CPP" >&6; }
ac_preproc_ok=false
for ac_c_preproc_warn_flag in '' yes
do
  # Use a header file that comes with gcc, so configuring glibc
  # with a fresh cross-compiler works.
  # Prefer <limits.h> to <assert.h> if __STDC__ is defined, since
  # <limits.h> exists even on freestanding compilers.
  # On the NeXT, cc -E runs the code through the compiler's parser,
  # not just through cpp. "Syntax error" is here to catch this case.
  cat >conftest.$ac_ext <<_ACEOF
/* confdefs.h.  */
_ACEOF
cat confdefs.h >>conftest.$ac_ext
cat >>conftest.$ac_ext <<_ACEOF
/* end confdefs.h.  */
#ifdef __STDC__
# include <limits.h>
#else
# include <assert.h>
#endif
		     Syntax error
_ACEOF
if { (ac_try="$ac_cpp conftest.$ac_ext"
case "(($ac_try" in
  *\"* | *\`* | *\\*) ac_try_echo=\$ac_try;;
  *) ac_try_echo=$ac_try;;
esac
eval "echo \"\$as_me:$LINENO: $ac_try_echo\"") >&5
  (eval "$ac_cpp conftest.$ac_ext") 2>conftest.er1
  ac_status=$?
  grep -v '^ *+' conftest.er1 >conftest.err
  rm -f conftest.er1
  cat conftest.err >&5
  echo "$as_me:$LINENO: \$? = $ac_status" >&5
  (exit $ac_status); } >/dev/null && {
	 test -z "$ac_c_preproc_warn_flag$ac_c_werror_flag" ||
	 test ! -s conftest.err
       }; then
  :
else
  echo "$as_me: failed program was:" >&5
sed 's/^/| /' conftest.$ac_ext >&5

  # Broken: fails on valid input.
continue
fi

rm -f conftest.err conftest.$ac_ext

  # OK, works on sane cases.  Now check whether nonexistent headers
  # can be detected and how.
  cat >conftest.$ac_ext <<_ACEOF
/* confdefs.h.  */
_ACEOF
cat confdefs.h >>conftest.$ac_ext
cat >>conftest.$ac_ext <<_ACEOF
/* end confdefs.h.  */
#include <ac_nonexistent.h>
_ACEOF
if { (ac_try="$ac_cpp conftest.$ac_ext"
case "(($ac_try" in
  *\"* | *\`* | *\\*) ac_try_echo=\$ac_try;;
  *) ac_try_echo=$ac_try;;
esac
eval "echo \"\$as_me:$LINENO: $ac_try_echo\"") >&5
  (eval "$ac_cpp conftest.$ac_ext") 2>conftest.er1
  ac_status=$?
  grep -v '^ *+' conftest.er1 >conftest.err
  rm -f conftest.er1
  cat conftest.err >&5
  echo "$as_me:$LINENO: \$? = $ac_status" >&5
  (exit $ac_status); } >/dev/null && {
	 test -z "$ac_c_preproc_warn_flag$ac_c_werror_flag" ||
	 test ! -s conftest.err
       }; then
  # Broken: success on invalid input.
continue
else
  echo "$as_me: failed program was:" >&5
sed 's/^/| /' conftest.$ac_ext >&5

  # Passes both tests.
ac_preproc_ok=:
break
fi

rm -f conftest.err conftest.$ac_ext

done
# Because of `break', _AC_PREPROC_IFELSE's cleaning code was skipped.
rm -f conftest.err conftest.$ac_ext
if $ac_preproc_ok; then
  :
else
  { { echo "$as_me:$LINENO: error: C preprocessor \"$CPP\" fails sanity check
See \`config.log' for more details." >&5
echo "$as_me: error: C preprocessor \"$CPP\" fails sanity check
See \`config.log' for more details." >&2;}
   { (exit 1); exit 1; }; }
fi

ac_ext=c
ac_cpp='$CPP $CPPFLAGS'
ac_compile='$CC -c $CFLAGS $CPPFLAGS conftest.$ac_ext >&5'
ac_link='$CC -o conftest$ac_exeext $CFLAGS $CPPFLAGS $LDFLAGS conftest.$ac_ext $LIBS >&5'
ac_compiler_gnu=$ac_cv_c_compiler_gnu

LINKER=$CXX


{ echo "$as_me:$LINENO: checking for grep that handles long lines and -e" >&5
echo $ECHO_N "checking for grep that handles long lines and -e... $ECHO_C" >&6; }
if test "${ac_cv_path_GREP+set}" = set; then
  echo $ECHO_N "(cached) $ECHO_C" >&6
else
  # Extract the first word of "grep ggrep" to use in msg output
if test -z "$GREP"; then
set dummy grep ggrep; ac_prog_name=$2
if test "${ac_cv_path_GREP+set}" = set; then
  echo $ECHO_N "(cached) $ECHO_C" >&6
else
  ac_path_GREP_found=false
# Loop through the user's path and test for each of PROGNAME-LIST
as_save_IFS=$IFS; IFS=$PATH_SEPARATOR
for as_dir in $PATH$PATH_SEPARATOR/usr/xpg4/bin
do
  IFS=$as_save_IFS
  test -z "$as_dir" && as_dir=.
  for ac_prog in grep ggrep; do
  for ac_exec_ext in '' $ac_executable_extensions; do
    ac_path_GREP="$as_dir/$ac_prog$ac_exec_ext"
    { test -f "$ac_path_GREP" && $as_test_x "$ac_path_GREP"; } || continue
    # Check for GNU ac_path_GREP and select it if it is found.
  # Check for GNU $ac_path_GREP
case `"$ac_path_GREP" --version 2>&1` in
*GNU*)
  ac_cv_path_GREP="$ac_path_GREP" ac_path_GREP_found=:;;
*)
  ac_count=0
  echo $ECHO_N "0123456789$ECHO_C" >"conftest.in"
  while :
  do
    cat "conftest.in" "conftest.in" >"conftest.tmp"
    mv "conftest.tmp" "conftest.in"
    cp "conftest.in" "conftest.nl"
    echo 'GREP' >> "conftest.nl"
    "$ac_path_GREP" -e 'GREP$' -e '-(cannot match)-' < "conftest.nl" >"conftest.out" 2>/dev/null || break
    diff "conftest.out" "conftest.nl" >/dev/null 2>&1 || break
    ac_count=`expr $ac_count + 1`
    if test $ac_count -gt ${ac_path_GREP_max-0}; then
      # Best one so far, save it but keep looking for a better one
      ac_cv_path_GREP="$ac_path_GREP"
      ac_path_GREP_max=$ac_count
    fi
    # 10*(2^10) chars as input seems more than enough
    test $ac_count -gt 10 && break
  done
  rm -f conftest.in conftest.tmp conftest.nl conftest.out;;
esac


    $ac_path_GREP_found && break 3
  done
done

done
IFS=$as_save_IFS


fi

GREP="$ac_cv_path_GREP"
if test -z "$GREP"; then
  { { echo "$as_me:$LINENO: error: no acceptable $ac_prog_name could be found in $PATH$PATH_SEPARATOR/usr/xpg4/bin" >&5
echo "$as_me: error: no acceptable $ac_prog_name could be found in $PATH$PATH_SEPARATOR/usr/xpg4/bin" >&2;}
   { (exit 1); exit 1; }; }
fi

else
  ac_cv_path_GREP=$GREP
fi


fi
{ echo "$as_me:$LINENO: result: $ac_cv_path_GREP" >&5
echo "${ECHO_T}$ac_cv_path_GREP" >&6; }
 GREP="$ac_cv_path_GREP"


{ echo "$as_me:$LINENO: checking for egrep" >&5
echo $ECHO_N "checking for egrep... $ECHO_C" >&6; }
if test "${ac_cv_path_EGREP+set}" = set; then
  echo $ECHO_N "(cached) $ECHO_C" >&6
else
  if echo a | $GREP -E '(a|b)' >/dev/null 2>&1
   then ac_cv_path_EGREP="$GREP -E"
   else
     # Extract the first word of "egrep" to use in msg output
if test -z "$EGREP"; then
set dummy egrep; ac_prog_name=$2
if test "${ac_cv_path_EGREP+set}" = set; then
  echo $ECHO_N "(cached) $ECHO_C" >&6
else
  ac_path_EGREP_found=false
# Loop through the user's path and test for each of PROGNAME-LIST
as_save_IFS=$IFS; IFS=$PATH_SEPARATOR
for as_dir in $PATH$PATH_SEPARATOR/usr/xpg4/bin
do
  IFS=$as_save_IFS
  test -z "$as_dir" && as_dir=.
  for ac_prog in egrep; do
  for ac_exec_ext in '' $ac_executable_extensions; do
    ac_path_EGREP="$as_dir/$ac_prog$ac_exec_ext"
    { test -f "$ac_path_EGREP" && $as_test_x "$ac_path_EGREP"; } || continue
    # Check for GNU ac_path_EGREP and select it if it is found.
  # Check for GNU $ac_path_EGREP
case `"$ac_path_EGREP" --version 2>&1` in
*GNU*)
  ac_cv_path_EGREP="$ac_path_EGREP" ac_path_EGREP_found=:;;
*)
  ac_count=0
  echo $ECHO_N "0123456789$ECHO_C" >"conftest.in"
  while :
  do
    cat "conftest.in" "conftest.in" >"conftest.tmp"
    mv "conftest.tmp" "conftest.in"
    cp "conftest.in" "conftest.nl"
    echo 'EGREP' >> "conftest.nl"
    "$ac_path_EGREP" 'EGREP$' < "conftest.nl" >"conftest.out" 2>/dev/null || break
    diff "conftest.out" "conftest.nl" >/dev/null 2>&1 || break
    ac_count=`expr $ac_count + 1`
    if test $ac_count -gt ${ac_path_EGREP_max-0}; then
      # Best one so far, save it but keep looking for a better one
      ac_cv_path_EGREP="$ac_path_EGREP"
      ac_path_EGREP_max=$ac_count
    fi
    # 10*(2^10) chars as input seems more than enough
    test $ac_count -gt 10 && break
  done
  rm -f conftest.in conftest.tmp conftest.nl conftest.out;;
esac


    $ac_path_EGREP_found && break 3
  done
done

done
IFS=$as_save_IFS


fi

EGREP="$ac_cv_path_EGREP"
if test -z "$EGREP"; then
  { { echo "$as_me:$LINENO: error: no acceptable $ac_prog_name could be found in $PATH$PATH_SEPARATOR/usr/xpg4/bin" >&5
echo "$as_me: error: no acceptable $ac_prog_name could be found in $PATH$PATH_SEPARATOR/usr/xpg4/bin" >&2;}
   { (exit 1); exit 1; }; }
fi

else
  ac_cv_path_EGREP=$EGREP
fi


   fi
fi
{ echo "$as_me:$LINENO: result: $ac_cv_path_EGREP" >&5
echo "${ECHO_T}$ac_cv_path_EGREP" >&6; }
 EGREP="$ac_cv_path_EGREP"


{ echo "$as_me:$LINENO: checking for ANSI C header files" >&5
echo $ECHO_N "checking for ANSI C header files... $ECHO_C" >&6; }
if test "${ac_cv_header_stdc+set}" = set; then
  echo $ECHO_N "(cached) $ECHO_C" >&6
else
  cat >conftest.$ac_ext <<_ACEOF
/* confdefs.h.  */
_ACEOF
cat confdefs.h >>conftest.$ac_ext
cat >>conftest.$ac_ext <<_ACEOF
/* end confdefs.h.  */
#include <stdlib.h>
#include <stdarg.h>
#include <string.h>
#include <float.h>

int
main ()
{

  ;
  return 0;
}
_ACEOF
rm -f conftest.$ac_objext
if { (ac_try="$ac_compile"
case "(($ac_try" in
  *\"* | *\`* | *\\*) ac_try_echo=\$ac_try;;
  *) ac_try_echo=$ac_try;;
esac
eval "echo \"\$as_me:$LINENO: $ac_try_echo\"") >&5
  (eval "$ac_compile") 2>conftest.er1
  ac_status=$?
  grep -v '^ *+' conftest.er1 >conftest.err
  rm -f conftest.er1
  cat conftest.err >&5
  echo "$as_me:$LINENO: \$? = $ac_status" >&5
  (exit $ac_status); } && {
	 test -z "$ac_c_werror_flag" ||
	 test ! -s conftest.err
       } && test -s conftest.$ac_objext; then
  ac_cv_header_stdc=yes
else
  echo "$as_me: failed program was:" >&5
sed 's/^/| /' conftest.$ac_ext >&5

	ac_cv_header_stdc=no
fi

rm -f core conftest.err conftest.$ac_objext conftest.$ac_ext

if test $ac_cv_header_stdc = yes; then
  # SunOS 4.x string.h does not declare mem*, contrary to ANSI.
  cat >conftest.$ac_ext <<_ACEOF
/* confdefs.h.  */
_ACEOF
cat confdefs.h >>conftest.$ac_ext
cat >>conftest.$ac_ext <<_ACEOF
/* end confdefs.h.  */
#include <string.h>

_ACEOF
if (eval "$ac_cpp conftest.$ac_ext") 2>&5 |
  $EGREP "memchr" >/dev/null 2>&1; then
  :
else
  ac_cv_header_stdc=no
fi
rm -f conftest*

fi

if test $ac_cv_header_stdc = yes; then
  # ISC 2.0.2 stdlib.h does not declare free, contrary to ANSI.
  cat >conftest.$ac_ext <<_ACEOF
/* confdefs.h.  */
_ACEOF
cat confdefs.h >>conftest.$ac_ext
cat >>conftest.$ac_ext <<_ACEOF
/* end confdefs.h.  */
#include <stdlib.h>

_ACEOF
if (eval "$ac_cpp conftest.$ac_ext") 2>&5 |
  $EGREP "free" >/dev/null 2>&1; then
  :
else
  ac_cv_header_stdc=no
fi
rm -f conftest*

fi

if test $ac_cv_header_stdc = yes; then
  # /bin/cc in Irix-4.0.5 gets non-ANSI ctype macros unless using -ansi.
  if test "$cross_compiling" = yes; then
  :
else
  cat >conftest.$ac_ext <<_ACEOF
/* confdefs.h.  */
_ACEOF
cat confdefs.h >>conftest.$ac_ext
cat >>conftest.$ac_ext <<_ACEOF
/* end confdefs.h.  */
#include <ctype.h>
#include <stdlib.h>
#if ((' ' & 0x0FF) == 0x020)
# define ISLOWER(c) ('a' <= (c) && (c) <= 'z')
# define TOUPPER(c) (ISLOWER(c) ? 'A' + ((c) - 'a') : (c))
#else
# define ISLOWER(c) \
		   (('a' <= (c) && (c) <= 'i') \
		     || ('j' <= (c) && (c) <= 'r') \
		     || ('s' <= (c) && (c) <= 'z'))
# define TOUPPER(c) (ISLOWER(c) ? ((c) | 0x40) : (c))
#endif

#define XOR(e, f) (((e) && !(f)) || (!(e) && (f)))
int
main ()
{
  int i;
  for (i = 0; i < 256; i++)
    if (XOR (islower (i), ISLOWER (i))
	|| toupper (i) != TOUPPER (i))
      return 2;
  return 0;
}
_ACEOF
rm -f conftest$ac_exeext
if { (ac_try="$ac_link"
case "(($ac_try" in
  *\"* | *\`* | *\\*) ac_try_echo=\$ac_try;;
  *) ac_try_echo=$ac_try;;
esac
eval "echo \"\$as_me:$LINENO: $ac_try_echo\"") >&5
  (eval "$ac_link") 2>&5
  ac_status=$?
  echo "$as_me:$LINENO: \$? = $ac_status" >&5
  (exit $ac_status); } && { ac_try='./conftest$ac_exeext'
  { (case "(($ac_try" in
  *\"* | *\`* | *\\*) ac_try_echo=\$ac_try;;
  *) ac_try_echo=$ac_try;;
esac
eval "echo \"\$as_me:$LINENO: $ac_try_echo\"") >&5
  (eval "$ac_try") 2>&5
  ac_status=$?
  echo "$as_me:$LINENO: \$? = $ac_status" >&5
  (exit $ac_status); }; }; then
  :
else
  echo "$as_me: program exited with status $ac_status" >&5
echo "$as_me: failed program was:" >&5
sed 's/^/| /' conftest.$ac_ext >&5

( exit $ac_status )
ac_cv_header_stdc=no
fi
rm -f core *.core core.conftest.* gmon.out bb.out conftest$ac_exeext conftest.$ac_objext conftest.$ac_ext
fi


fi
fi
{ echo "$as_me:$LINENO: result: $ac_cv_header_stdc" >&5
echo "${ECHO_T}$ac_cv_header_stdc" >&6; }
if test $ac_cv_header_stdc = yes; then

cat >>confdefs.h <<\_ACEOF
#define STDC_HEADERS 1
_ACEOF

fi

# On IRIX 5.3, sys/types and inttypes.h are conflicting.


for ac_header in sys/types.h sys/stat.h stdlib.h string.h memory.h strings.h \
		  inttypes.h stdint.h unistd.h
do
as_ac_Header=`echo "ac_cv_header_$ac_header" | $as_tr_sh`
{ echo "$as_me:$LINENO: checking for $ac_header" >&5
echo $ECHO_N "checking for $ac_header... $ECHO_C" >&6; }
if { as_var=$as_ac_Header; eval "test \"\${$as_var+set}\" = set"; }; then
  echo $ECHO_N "(cached) $ECHO_C" >&6
else
  cat >conftest.$ac_ext <<_ACEOF
/* confdefs.h.  */
_ACEOF
cat confdefs.h >>conftest.$ac_ext
cat >>conftest.$ac_ext <<_ACEOF
/* end confdefs.h.  */
$ac_includes_default

#include <$ac_header>
_ACEOF
rm -f conftest.$ac_objext
if { (ac_try="$ac_compile"
case "(($ac_try" in
  *\"* | *\`* | *\\*) ac_try_echo=\$ac_try;;
  *) ac_try_echo=$ac_try;;
esac
eval "echo \"\$as_me:$LINENO: $ac_try_echo\"") >&5
  (eval "$ac_compile") 2>conftest.er1
  ac_status=$?
  grep -v '^ *+' conftest.er1 >conftest.err
  rm -f conftest.er1
  cat conftest.err >&5
  echo "$as_me:$LINENO: \$? = $ac_status" >&5
  (exit $ac_status); } && {
	 test -z "$ac_c_werror_flag" ||
	 test ! -s conftest.err
       } && test -s conftest.$ac_objext; then
  eval "$as_ac_Header=yes"
else
  echo "$as_me: failed program was:" >&5
sed 's/^/| /' conftest.$ac_ext >&5

	eval "$as_ac_Header=no"
fi

rm -f core conftest.err conftest.$ac_objext conftest.$ac_ext
fi
ac_res=`eval echo '${'$as_ac_Header'}'`
	       { echo "$as_me:$LINENO: result: $ac_res" >&5
echo "${ECHO_T}$ac_res" >&6; }
if test `eval echo '${'$as_ac_Header'}'` = yes; then
  cat >>confdefs.h <<_ACEOF
#define `echo "HAVE_$ac_header" | $as_tr_cpp` 1
_ACEOF

fi

done


{ echo "$as_me:$LINENO: checking for long int" >&5
echo $ECHO_N "checking for long int... $ECHO_C" >&6; }
if test "${ac_cv_type_long_int+set}" = set; then
  echo $ECHO_N "(cached) $ECHO_C" >&6
else
  cat >conftest.$ac_ext <<_ACEOF
/* confdefs.h.  */
_ACEOF
cat confdefs.h >>conftest.$ac_ext
cat >>conftest.$ac_ext <<_ACEOF
/* end confdefs.h.  */
$ac_includes_default
typedef long int ac__type_new_;
int
main ()
{
if ((ac__type_new_ *) 0)
  return 0;
if (sizeof (ac__type_new_))
  return 0;
  ;
  return 0;
}
_ACEOF
rm -f conftest.$ac_objext
if { (ac_try="$ac_compile"
case "(($ac_try" in
  *\"* | *\`* | *\\*) ac_try_echo=\$ac_try;;
  *) ac_try_echo=$ac_try;;
esac
eval "echo \"\$as_me:$LINENO: $ac_try_echo\"") >&5
  (eval "$ac_compile") 2>conftest.er1
  ac_status=$?
  grep -v '^ *+' conftest.er1 >conftest.err
  rm -f conftest.er1
  cat conftest.err >&5
  echo "$as_me:$LINENO: \$? = $ac_status" >&5
  (exit $ac_status); } && {
	 test -z "$ac_c_werror_flag" ||
	 test ! -s conftest.err
       } && test -s conftest.$ac_objext; then
  ac_cv_type_long_int=yes
else
  echo "$as_me: failed program was:" >&5
sed 's/^/| /' conftest.$ac_ext >&5

	ac_cv_type_long_int=no
fi

rm -f core conftest.err conftest.$ac_objext conftest.$ac_ext
fi
{ echo "$as_me:$LINENO: result: $ac_cv_type_long_int" >&5
echo "${ECHO_T}$ac_cv_type_long_int" >&6; }

# The cast to long int works around a bug in the HP C Compiler
# version HP92453-01 B.11.11.23709.GP, which incorrectly rejects
# declarations like `int a3[[(sizeof (unsigned char)) >= 0]];'.
# This bug is HP SR number 8606223364.
{ echo "$as_me:$LINENO: checking size of long int" >&5
echo $ECHO_N "checking size of long int... $ECHO_C" >&6; }
if test "${ac_cv_sizeof_long_int+set}" = set; then
  echo $ECHO_N "(cached) $ECHO_C" >&6
else
  if test "$cross_compiling" = yes; then
  # Depending upon the size, compute the lo and hi bounds.
cat >conftest.$ac_ext <<_ACEOF
/* confdefs.h.  */
_ACEOF
cat confdefs.h >>conftest.$ac_ext
cat >>conftest.$ac_ext <<_ACEOF
/* end confdefs.h.  */
$ac_includes_default
   typedef long int ac__type_sizeof_;
int
main ()
{
static int test_array [1 - 2 * !(((long int) (sizeof (ac__type_sizeof_))) >= 0)];
test_array [0] = 0

  ;
  return 0;
}
_ACEOF
rm -f conftest.$ac_objext
if { (ac_try="$ac_compile"
case "(($ac_try" in
  *\"* | *\`* | *\\*) ac_try_echo=\$ac_try;;
  *) ac_try_echo=$ac_try;;
esac
eval "echo \"\$as_me:$LINENO: $ac_try_echo\"") >&5
  (eval "$ac_compile") 2>conftest.er1
  ac_status=$?
  grep -v '^ *+' conftest.er1 >conftest.err
  rm -f conftest.er1
  cat conftest.err >&5
  echo "$as_me:$LINENO: \$? = $ac_status" >&5
  (exit $ac_status); } && {
	 test -z "$ac_c_werror_flag" ||
	 test ! -s conftest.err
       } && test -s conftest.$ac_objext; then
  ac_lo=0 ac_mid=0
  while :; do
    cat >conftest.$ac_ext <<_ACEOF
/* confdefs.h.  */
_ACEOF
cat confdefs.h >>conftest.$ac_ext
cat >>conftest.$ac_ext <<_ACEOF
/* end confdefs.h.  */
$ac_includes_default
   typedef long int ac__type_sizeof_;
int
main ()
{
static int test_array [1 - 2 * !(((long int) (sizeof (ac__type_sizeof_))) <= $ac_mid)];
test_array [0] = 0

  ;
  return 0;
}
_ACEOF
rm -f conftest.$ac_objext
if { (ac_try="$ac_compile"
case "(($ac_try" in
  *\"* | *\`* | *\\*) ac_try_echo=\$ac_try;;
  *) ac_try_echo=$ac_try;;
esac
eval "echo \"\$as_me:$LINENO: $ac_try_echo\"") >&5
  (eval "$ac_compile") 2>conftest.er1
  ac_status=$?
  grep -v '^ *+' conftest.er1 >conftest.err
  rm -f conftest.er1
  cat conftest.err >&5
  echo "$as_me:$LINENO: \$? = $ac_status" >&5
  (exit $ac_status); } && {
	 test -z "$ac_c_werror_flag" ||
	 test ! -s conftest.err
       } && test -s conftest.$ac_objext; then
  ac_hi=$ac_mid; break
else
  echo "$as_me: failed program was:" >&5
sed 's/^/| /' conftest.$ac_ext >&5

	ac_lo=`expr $ac_mid + 1`
			if test $ac_lo -le $ac_mid; then
			  ac_lo= ac_hi=
			  break
			fi
			ac_mid=`expr 2 '*' $ac_mid + 1`
fi

rm -f core conftest.err conftest.$ac_objext conftest.$ac_ext
  done
else
  echo "$as_me: failed program was:" >&5
sed 's/^/| /' conftest.$ac_ext >&5

	cat >conftest.$ac_ext <<_ACEOF
/* confdefs.h.  */
_ACEOF
cat confdefs.h >>conftest.$ac_ext
cat >>conftest.$ac_ext <<_ACEOF
/* end confdefs.h.  */
$ac_includes_default
   typedef long int ac__type_sizeof_;
int
main ()
{
static int test_array [1 - 2 * !(((long int) (sizeof (ac__type_sizeof_))) < 0)];
test_array [0] = 0

  ;
  return 0;
}
_ACEOF
rm -f conftest.$ac_objext
if { (ac_try="$ac_compile"
case "(($ac_try" in
  *\"* | *\`* | *\\*) ac_try_echo=\$ac_try;;
  *) ac_try_echo=$ac_try;;
esac
eval "echo \"\$as_me:$LINENO: $ac_try_echo\"") >&5
  (eval "$ac_compile") 2>conftest.er1
  ac_status=$?
  grep -v '^ *+' conftest.er1 >conftest.err
  rm -f conftest.er1
  cat conftest.err >&5
  echo "$as_me:$LINENO: \$? = $ac_status" >&5
  (exit $ac_status); } && {
	 test -z "$ac_c_werror_flag" ||
	 test ! -s conftest.err
       } && test -s conftest.$ac_objext; then
  ac_hi=-1 ac_mid=-1
  while :; do
    cat >conftest.$ac_ext <<_ACEOF
/* confdefs.h.  */
_ACEOF
cat confdefs.h >>conftest.$ac_ext
cat >>conftest.$ac_ext <<_ACEOF
/* end confdefs.h.  */
$ac_includes_default
   typedef long int ac__type_sizeof_;
int
main ()
{
static int test_array [1 - 2 * !(((long int) (sizeof (ac__type_sizeof_))) >= $ac_mid)];
test_array [0] = 0

  ;
  return 0;
}
_ACEOF
rm -f conftest.$ac_objext
if { (ac_try="$ac_compile"
case "(($ac_try" in
  *\"* | *\`* | *\\*) ac_try_echo=\$ac_try;;
  *) ac_try_echo=$ac_try;;
esac
eval "echo \"\$as_me:$LINENO: $ac_try_echo\"") >&5
  (eval "$ac_compile") 2>conftest.er1
  ac_status=$?
  grep -v '^ *+' conftest.er1 >conftest.err
  rm -f conftest.er1
  cat conftest.err >&5
  echo "$as_me:$LINENO: \$? = $ac_status" >&5
  (exit $ac_status); } && {
	 test -z "$ac_c_werror_flag" ||
	 test ! -s conftest.err
       } && test -s conftest.$ac_objext; then
  ac_lo=$ac_mid; break
else
  echo "$as_me: failed program was:" >&5
sed 's/^/| /' conftest.$ac_ext >&5

	ac_hi=`expr '(' $ac_mid ')' - 1`
			if test $ac_mid -le $ac_hi; then
			  ac_lo= ac_hi=
			  break
			fi
			ac_mid=`expr 2 '*' $ac_mid`
fi

rm -f core conftest.err conftest.$ac_objext conftest.$ac_ext
  done
else
  echo "$as_me: failed program was:" >&5
sed 's/^/| /' conftest.$ac_ext >&5

	ac_lo= ac_hi=
fi

rm -f core conftest.err conftest.$ac_objext conftest.$ac_ext
fi

rm -f core conftest.err conftest.$ac_objext conftest.$ac_ext
# Binary search between lo and hi bounds.
while test "x$ac_lo" != "x$ac_hi"; do
  ac_mid=`expr '(' $ac_hi - $ac_lo ')' / 2 + $ac_lo`
  cat >conftest.$ac_ext <<_ACEOF
/* confdefs.h.  */
_ACEOF
cat confdefs.h >>conftest.$ac_ext
cat >>conftest.$ac_ext <<_ACEOF
/* end confdefs.h.  */
$ac_includes_default
   typedef long int ac__type_sizeof_;
int
main ()
{
static int test_array [1 - 2 * !(((long int) (sizeof (ac__type_sizeof_))) <= $ac_mid)];
test_array [0] = 0

  ;
  return 0;
}
_ACEOF
rm -f conftest.$ac_objext
if { (ac_try="$ac_compile"
case "(($ac_try" in
  *\"* | *\`* | *\\*) ac_try_echo=\$ac_try;;
  *) ac_try_echo=$ac_try;;
esac
eval "echo \"\$as_me:$LINENO: $ac_try_echo\"") >&5
  (eval "$ac_compile") 2>conftest.er1
  ac_status=$?
  grep -v '^ *+' conftest.er1 >conftest.err
  rm -f conftest.er1
  cat conftest.err >&5
  echo "$as_me:$LINENO: \$? = $ac_status" >&5
  (exit $ac_status); } && {
	 test -z "$ac_c_werror_flag" ||
	 test ! -s conftest.err
       } && test -s conftest.$ac_objext; then
  ac_hi=$ac_mid
else
  echo "$as_me: failed program was:" >&5
sed 's/^/| /' conftest.$ac_ext >&5

	ac_lo=`expr '(' $ac_mid ')' + 1`
fi

rm -f core conftest.err conftest.$ac_objext conftest.$ac_ext
done
case $ac_lo in
?*) ac_cv_sizeof_long_int=$ac_lo;;
'') if test "$ac_cv_type_long_int" = yes; then
     { { echo "$as_me:$LINENO: error: cannot compute sizeof (long int)
See \`config.log' for more details." >&5
echo "$as_me: error: cannot compute sizeof (long int)
See \`config.log' for more details." >&2;}
   { (exit 77); exit 77; }; }
   else
     ac_cv_sizeof_long_int=0
   fi ;;
esac
else
  cat >conftest.$ac_ext <<_ACEOF
/* confdefs.h.  */
_ACEOF
cat confdefs.h >>conftest.$ac_ext
cat >>conftest.$ac_ext <<_ACEOF
/* end confdefs.h.  */
$ac_includes_default
   typedef long int ac__type_sizeof_;
static long int longval () { return (long int) (sizeof (ac__type_sizeof_)); }
static unsigned long int ulongval () { return (long int) (sizeof (ac__type_sizeof_)); }
#include <stdio.h>
#include <stdlib.h>
int
main ()
{

  FILE *f = fopen ("conftest.val", "w");
  if (! f)
    return 1;
  if (((long int) (sizeof (ac__type_sizeof_))) < 0)
    {
      long int i = longval ();
      if (i != ((long int) (sizeof (ac__type_sizeof_))))
	return 1;
      fprintf (f, "%ld\n", i);
    }
  else
    {
      unsigned long int i = ulongval ();
      if (i != ((long int) (sizeof (ac__type_sizeof_))))
	return 1;
      fprintf (f, "%lu\n", i);
    }
  return ferror (f) || fclose (f) != 0;

  ;
  return 0;
}
_ACEOF
rm -f conftest$ac_exeext
if { (ac_try="$ac_link"
case "(($ac_try" in
  *\"* | *\`* | *\\*) ac_try_echo=\$ac_try;;
  *) ac_try_echo=$ac_try;;
esac
eval "echo \"\$as_me:$LINENO: $ac_try_echo\"") >&5
  (eval "$ac_link") 2>&5
  ac_status=$?
  echo "$as_me:$LINENO: \$? = $ac_status" >&5
  (exit $ac_status); } && { ac_try='./conftest$ac_exeext'
  { (case "(($ac_try" in
  *\"* | *\`* | *\\*) ac_try_echo=\$ac_try;;
  *) ac_try_echo=$ac_try;;
esac
eval "echo \"\$as_me:$LINENO: $ac_try_echo\"") >&5
  (eval "$ac_try") 2>&5
  ac_status=$?
  echo "$as_me:$LINENO: \$? = $ac_status" >&5
  (exit $ac_status); }; }; then
  ac_cv_sizeof_long_int=`cat conftest.val`
else
  echo "$as_me: program exited with status $ac_status" >&5
echo "$as_me: failed program was:" >&5
sed 's/^/| /' conftest.$ac_ext >&5

( exit $ac_status )
if test "$ac_cv_type_long_int" = yes; then
     { { echo "$as_me:$LINENO: error: cannot compute sizeof (long int)
See \`config.log' for more details." >&5
echo "$as_me: error: cannot compute sizeof (long int)
See \`config.log' for more details." >&2;}
   { (exit 77); exit 77; }; }
   else
     ac_cv_sizeof_long_int=0
   fi
fi
rm -f core *.core core.conftest.* gmon.out bb.out conftest$ac_exeext conftest.$ac_objext conftest.$ac_ext
fi
rm -f conftest.val
fi
{ echo "$as_me:$LINENO: result: $ac_cv_sizeof_long_int" >&5
echo "${ECHO_T}$ac_cv_sizeof_long_int" >&6; }


cat >>confdefs.h <<_ACEOF
#define SIZEOF_LONG_INT $ac_cv_sizeof_long_int
_ACEOF


test $ac_cv_sizeof_long_int = 8 &&

cat >>confdefs.h <<\_ACEOF
#define LONG_64_BITS 1
_ACEOF


# Find fortran libraries required when linking with C++ main.
ac_ext=${ac_fc_srcext-f}
ac_compile='$FC -c $FCFLAGS $ac_fcflags_srcext conftest.$ac_ext >&5'
ac_link='$FC -o conftest$ac_exeext $FCFLAGS $LDFLAGS $ac_fcflags_srcext conftest.$ac_ext $LIBS >&5'
ac_compiler_gnu=$ac_cv_fc_compiler_gnu
{ echo "$as_me:$LINENO: checking how to get verbose linking output from $FC" >&5
echo $ECHO_N "checking how to get verbose linking output from $FC... $ECHO_C" >&6; }
if test "${ac_cv_prog_fc_v+set}" = set; then
  echo $ECHO_N "(cached) $ECHO_C" >&6
else
  cat >conftest.$ac_ext <<_ACEOF
      program main

      end
_ACEOF
rm -f conftest.$ac_objext
if { (ac_try="$ac_compile"
case "(($ac_try" in
  *\"* | *\`* | *\\*) ac_try_echo=\$ac_try;;
  *) ac_try_echo=$ac_try;;
esac
eval "echo \"\$as_me:$LINENO: $ac_try_echo\"") >&5
  (eval "$ac_compile") 2>conftest.er1
  ac_status=$?
  grep -v '^ *+' conftest.er1 >conftest.err
  rm -f conftest.er1
  cat conftest.err >&5
  echo "$as_me:$LINENO: \$? = $ac_status" >&5
  (exit $ac_status); } && {
	 test -z "$ac_fc_werror_flag" ||
	 test ! -s conftest.err
       } && test -s conftest.$ac_objext; then
  ac_cv_prog_fc_v=
# Try some options frequently used verbose output
for ac_verb in -v -verbose --verbose -V -\#\#\#; do
  cat >conftest.$ac_ext <<_ACEOF
      program main

      end
_ACEOF

# Compile and link our simple test program by passing a flag (argument
# 1 to this macro) to the Fortran compiler in order to get
# "verbose" output that we can then parse for the Fortran linker
# flags.
ac_save_FFLAGS=$FCFLAGS
FCFLAGS="$FCFLAGS $ac_verb"
eval "set x $ac_link"
shift
echo "$as_me:$LINENO: $*" >&5
ac_fc_v_output=`eval $ac_link 5>&1 2>&1 | grep -v 'Driving:'`
echo "$ac_fc_v_output" >&5
FCFLAGS=$ac_save_FFLAGS

rm -f conftest*

# On HP/UX there is a line like: "LPATH is: /foo:/bar:/baz" where
# /foo, /bar, and /baz are search directories for the Fortran linker.
# Here, we change these into -L/foo -L/bar -L/baz (and put it first):
ac_fc_v_output="`echo $ac_fc_v_output |
	grep 'LPATH is:' |
	sed 's,.*LPATH is\(: *[^ ]*\).*,\1,;s,: */, -L/,g'` $ac_fc_v_output"

# FIXME: we keep getting bitten by quoted arguments; a more general fix
#        that detects unbalanced quotes in FLIBS should be implemented
#        and (ugh) tested at some point.
case $ac_fc_v_output in
  # If we are using xlf then replace all the commas with spaces.
  *xlfentry*)
    ac_fc_v_output=`echo $ac_fc_v_output | sed 's/,/ /g'` ;;

  # With Intel ifc, ignore the quoted -mGLOB_options_string stuff (quoted
  # $LIBS confuse us, and the libraries appear later in the output anyway).
  *mGLOB_options_string*)
    ac_fc_v_output=`echo $ac_fc_v_output | sed 's/"-mGLOB[^"]*"/ /g'` ;;

  # Portland Group compiler has singly- or doubly-quoted -cmdline argument
  # Singly-quoted arguments were reported for versions 5.2-4 and 6.0-4.
  # Doubly-quoted arguments were reported for "PGF90/x86 Linux/x86 5.0-2".
  *-cmdline\ * | *-ignore\ * | *-def\ *)
    ac_fc_v_output=`echo $ac_fc_v_output | sed "\
        s/-cmdline  *'[^']*'/ /g; s/-cmdline  *\"[^\"]*\"/ /g
        s/-ignore  *'[^']*'/ /g; s/-ignore  *\"[^\"]*\"/ /g
        s/-def  *'[^']*'/ /g; s/-def  *\"[^\"]*\"/ /g"` ;;

  # If we are using Cray Fortran then delete quotes.
  *cft90*)
    ac_fc_v_output=`echo $ac_fc_v_output | sed 's/"//g'` ;;
esac


  # look for -l* and *.a constructs in the output
  for ac_arg in $ac_fc_v_output; do
     case $ac_arg in
        [\\/]*.a | ?:[\\/]*.a | -[lLRu]*)
          ac_cv_prog_fc_v=$ac_verb
          break 2 ;;
     esac
  done
done
if test -z "$ac_cv_prog_fc_v"; then
   { echo "$as_me:$LINENO: WARNING: cannot determine how to obtain linking information from $FC" >&5
echo "$as_me: WARNING: cannot determine how to obtain linking information from $FC" >&2;}
fi
else
  echo "$as_me: failed program was:" >&5
sed 's/^/| /' conftest.$ac_ext >&5

	{ echo "$as_me:$LINENO: WARNING: compilation failed" >&5
echo "$as_me: WARNING: compilation failed" >&2;}
fi

rm -f core conftest.err conftest.$ac_objext conftest.$ac_ext

fi
{ echo "$as_me:$LINENO: result: $ac_cv_prog_fc_v" >&5
echo "${ECHO_T}$ac_cv_prog_fc_v" >&6; }
{ echo "$as_me:$LINENO: checking for Fortran libraries of $FC" >&5
echo $ECHO_N "checking for Fortran libraries of $FC... $ECHO_C" >&6; }
if test "${ac_cv_fc_libs+set}" = set; then
  echo $ECHO_N "(cached) $ECHO_C" >&6
else
  if test "x$FCLIBS" != "x"; then
  ac_cv_fc_libs="$FCLIBS" # Let the user override the test.
else

cat >conftest.$ac_ext <<_ACEOF
      program main

      end
_ACEOF

# Compile and link our simple test program by passing a flag (argument
# 1 to this macro) to the Fortran compiler in order to get
# "verbose" output that we can then parse for the Fortran linker
# flags.
ac_save_FFLAGS=$FCFLAGS
FCFLAGS="$FCFLAGS $ac_cv_prog_fc_v"
eval "set x $ac_link"
shift
echo "$as_me:$LINENO: $*" >&5
ac_fc_v_output=`eval $ac_link 5>&1 2>&1 | grep -v 'Driving:'`
echo "$ac_fc_v_output" >&5
FCFLAGS=$ac_save_FFLAGS

rm -f conftest*

# On HP/UX there is a line like: "LPATH is: /foo:/bar:/baz" where
# /foo, /bar, and /baz are search directories for the Fortran linker.
# Here, we change these into -L/foo -L/bar -L/baz (and put it first):
ac_fc_v_output="`echo $ac_fc_v_output |
	grep 'LPATH is:' |
	sed 's,.*LPATH is\(: *[^ ]*\).*,\1,;s,: */, -L/,g'` $ac_fc_v_output"

# FIXME: we keep getting bitten by quoted arguments; a more general fix
#        that detects unbalanced quotes in FLIBS should be implemented
#        and (ugh) tested at some point.
case $ac_fc_v_output in
  # If we are using xlf then replace all the commas with spaces.
  *xlfentry*)
    ac_fc_v_output=`echo $ac_fc_v_output | sed 's/,/ /g'` ;;

  # With Intel ifc, ignore the quoted -mGLOB_options_string stuff (quoted
  # $LIBS confuse us, and the libraries appear later in the output anyway).
  *mGLOB_options_string*)
    ac_fc_v_output=`echo $ac_fc_v_output | sed 's/"-mGLOB[^"]*"/ /g'` ;;

  # Portland Group compiler has singly- or doubly-quoted -cmdline argument
  # Singly-quoted arguments were reported for versions 5.2-4 and 6.0-4.
  # Doubly-quoted arguments were reported for "PGF90/x86 Linux/x86 5.0-2".
  *-cmdline\ * | *-ignore\ * | *-def\ *)
    ac_fc_v_output=`echo $ac_fc_v_output | sed "\
        s/-cmdline  *'[^']*'/ /g; s/-cmdline  *\"[^\"]*\"/ /g
        s/-ignore  *'[^']*'/ /g; s/-ignore  *\"[^\"]*\"/ /g
        s/-def  *'[^']*'/ /g; s/-def  *\"[^\"]*\"/ /g"` ;;

  # If we are using Cray Fortran then delete quotes.
  *cft90*)
    ac_fc_v_output=`echo $ac_fc_v_output | sed 's/"//g'` ;;
esac


ac_cv_fc_libs=

# Save positional arguments (if any)
ac_save_positional="$@"

set X $ac_fc_v_output
while test $# != 1; do
  shift
  ac_arg=$1
  case $ac_arg in
        [\\/]*.a | ?:[\\/]*.a)
            ac_exists=false
  for ac_i in $ac_cv_fc_libs; do
    if test x"$ac_arg" = x"$ac_i"; then
      ac_exists=true
      break
    fi
  done

  if test x"$ac_exists" = xtrue; then
  :
else
  ac_cv_fc_libs="$ac_cv_fc_libs $ac_arg"
fi

          ;;
        -bI:*)
            ac_exists=false
  for ac_i in $ac_cv_fc_libs; do
    if test x"$ac_arg" = x"$ac_i"; then
      ac_exists=true
      break
    fi
  done

  if test x"$ac_exists" = xtrue; then
  :
else
  if test "$ac_compiler_gnu" = yes; then
  for ac_link_opt in $ac_arg; do
    ac_cv_fc_libs="$ac_cv_fc_libs -Xlinker $ac_link_opt"
  done
else
  ac_cv_fc_libs="$ac_cv_fc_libs $ac_arg"
fi
fi

          ;;
          # Ignore these flags.
        -lang* | -lcrt*.o | -lc | -lgcc* | -lSystem | -libmil | -LANG:=* | -LIST:* | -LNO:*)
          ;;
        -lkernel32)
          test x"$CYGWIN" != xyes && ac_cv_fc_libs="$ac_cv_fc_libs $ac_arg"
          ;;
        -[LRuYz])
          # These flags, when seen by themselves, take an argument.
          # We remove the space between option and argument and re-iterate
          # unless we find an empty arg or a new option (starting with -)
	  case $2 in
	     "" | -*);;
	     *)
		ac_arg="$ac_arg$2"
		shift; shift
		set X $ac_arg "$@"
		;;
	  esac
          ;;
        -YP,*)
          for ac_j in `echo $ac_arg | sed -e 's/-YP,/-L/;s/:/ -L/g'`; do
              ac_exists=false
  for ac_i in $ac_cv_fc_libs; do
    if test x"$ac_j" = x"$ac_i"; then
      ac_exists=true
      break
    fi
  done

  if test x"$ac_exists" = xtrue; then
  :
else
  ac_arg="$ac_arg $ac_j"
                               ac_cv_fc_libs="$ac_cv_fc_libs $ac_j"
fi

          done
          ;;
        -[lLR]*)
            ac_exists=false
  for ac_i in $ac_cv_fc_libs; do
    if test x"$ac_arg" = x"$ac_i"; then
      ac_exists=true
      break
    fi
  done

  if test x"$ac_exists" = xtrue; then
  :
else
  ac_cv_fc_libs="$ac_cv_fc_libs $ac_arg"
fi

          ;;
	-zallextract*| -zdefaultextract)
	  ac_cv_fc_libs="$ac_cv_fc_libs $ac_arg"
	  ;;
          # Ignore everything else.
  esac
done
# restore positional arguments
set X $ac_save_positional; shift

# We only consider "LD_RUN_PATH" on Solaris systems.  If this is seen,
# then we insist that the "run path" must be an absolute path (i.e. it
# must begin with a "/").
case `(uname -sr) 2>/dev/null` in
   "SunOS 5"*)
      ac_ld_run_path=`echo $ac_fc_v_output |
                        sed -n 's,^.*LD_RUN_PATH *= *\(/[^ ]*\).*$,-R\1,p'`
      test "x$ac_ld_run_path" != x &&
        if test "$ac_compiler_gnu" = yes; then
  for ac_link_opt in $ac_ld_run_path; do
    ac_cv_fc_libs="$ac_cv_fc_libs -Xlinker $ac_link_opt"
  done
else
  ac_cv_fc_libs="$ac_cv_fc_libs $ac_ld_run_path"
fi
      ;;
esac
fi # test "x$[]_AC_LANG_PREFIX[]LIBS" = "x"

fi
{ echo "$as_me:$LINENO: result: $ac_cv_fc_libs" >&5
echo "${ECHO_T}$ac_cv_fc_libs" >&6; }
FCLIBS="$ac_cv_fc_libs"


ac_ext=c
ac_cpp='$CPP $CPPFLAGS'
ac_compile='$CC -c $CFLAGS $CPPFLAGS conftest.$ac_ext >&5'
ac_link='$CC -o conftest$ac_exeext $CFLAGS $CPPFLAGS $LDFLAGS conftest.$ac_ext $LIBS >&5'
ac_compiler_gnu=$ac_cv_c_compiler_gnu


ac_ext=f
ac_compile='$F77 -c $FFLAGS conftest.$ac_ext >&5'
ac_link='$F77 -o conftest$ac_exeext $FFLAGS $LDFLAGS conftest.$ac_ext $LIBS >&5'
ac_compiler_gnu=$ac_cv_f77_compiler_gnu

{ echo "$as_me:$LINENO: checking for dummy main to link with Fortran 77 libraries" >&5
echo $ECHO_N "checking for dummy main to link with Fortran 77 libraries... $ECHO_C" >&6; }
if test "${ac_cv_f77_dummy_main+set}" = set; then
  echo $ECHO_N "(cached) $ECHO_C" >&6
else
  ac_f77_dm_save_LIBS=$LIBS
 LIBS="$LIBS $FLIBS"
 ac_fortran_dm_var=F77_DUMMY_MAIN
 ac_ext=c
ac_cpp='$CPP $CPPFLAGS'
ac_compile='$CC -c $CFLAGS $CPPFLAGS conftest.$ac_ext >&5'
ac_link='$CC -o conftest$ac_exeext $CFLAGS $CPPFLAGS $LDFLAGS conftest.$ac_ext $LIBS >&5'
ac_compiler_gnu=$ac_cv_c_compiler_gnu

 # First, try linking without a dummy main:
 cat >conftest.$ac_ext <<_ACEOF
/* confdefs.h.  */
_ACEOF
cat confdefs.h >>conftest.$ac_ext
cat >>conftest.$ac_ext <<_ACEOF
/* end confdefs.h.  */

#ifdef F77_DUMMY_MAIN

#  ifdef __cplusplus
     extern "C"
#  endif
   int F77_DUMMY_MAIN() { return 1; }

#endif
int
main ()
{

  ;
  return 0;
}
_ACEOF
rm -f conftest.$ac_objext conftest$ac_exeext
if { (ac_try="$ac_link"
case "(($ac_try" in
  *\"* | *\`* | *\\*) ac_try_echo=\$ac_try;;
  *) ac_try_echo=$ac_try;;
esac
eval "echo \"\$as_me:$LINENO: $ac_try_echo\"") >&5
  (eval "$ac_link") 2>conftest.er1
  ac_status=$?
  grep -v '^ *+' conftest.er1 >conftest.err
  rm -f conftest.er1
  cat conftest.err >&5
  echo "$as_me:$LINENO: \$? = $ac_status" >&5
  (exit $ac_status); } && {
	 test -z "$ac_c_werror_flag" ||
	 test ! -s conftest.err
       } && test -s conftest$ac_exeext &&
       $as_test_x conftest$ac_exeext; then
  ac_cv_fortran_dummy_main=none
else
  echo "$as_me: failed program was:" >&5
sed 's/^/| /' conftest.$ac_ext >&5

	ac_cv_fortran_dummy_main=unknown
fi

rm -f core conftest.err conftest.$ac_objext conftest_ipa8_conftest.oo \
      conftest$ac_exeext conftest.$ac_ext

 if test $ac_cv_fortran_dummy_main = unknown; then
   for ac_func in MAIN__ MAIN_ __main MAIN _MAIN __MAIN main_ main__ _main; do
     cat >conftest.$ac_ext <<_ACEOF
/* confdefs.h.  */
_ACEOF
cat confdefs.h >>conftest.$ac_ext
cat >>conftest.$ac_ext <<_ACEOF
/* end confdefs.h.  */
#define $ac_fortran_dm_var $ac_func
#ifdef F77_DUMMY_MAIN

#  ifdef __cplusplus
     extern "C"
#  endif
   int F77_DUMMY_MAIN() { return 1; }

#endif
int
main ()
{

  ;
  return 0;
}
_ACEOF
rm -f conftest.$ac_objext conftest$ac_exeext
if { (ac_try="$ac_link"
case "(($ac_try" in
  *\"* | *\`* | *\\*) ac_try_echo=\$ac_try;;
  *) ac_try_echo=$ac_try;;
esac
eval "echo \"\$as_me:$LINENO: $ac_try_echo\"") >&5
  (eval "$ac_link") 2>conftest.er1
  ac_status=$?
  grep -v '^ *+' conftest.er1 >conftest.err
  rm -f conftest.er1
  cat conftest.err >&5
  echo "$as_me:$LINENO: \$? = $ac_status" >&5
  (exit $ac_status); } && {
	 test -z "$ac_c_werror_flag" ||
	 test ! -s conftest.err
       } && test -s conftest$ac_exeext &&
       $as_test_x conftest$ac_exeext; then
  ac_cv_fortran_dummy_main=$ac_func; break
else
  echo "$as_me: failed program was:" >&5
sed 's/^/| /' conftest.$ac_ext >&5


fi

rm -f core conftest.err conftest.$ac_objext conftest_ipa8_conftest.oo \
      conftest$ac_exeext conftest.$ac_ext
   done
 fi
 ac_ext=f
ac_compile='$F77 -c $FFLAGS conftest.$ac_ext >&5'
ac_link='$F77 -o conftest$ac_exeext $FFLAGS $LDFLAGS conftest.$ac_ext $LIBS >&5'
ac_compiler_gnu=$ac_cv_f77_compiler_gnu
 ac_cv_f77_dummy_main=$ac_cv_fortran_dummy_main
 rm -f conftest*
 LIBS=$ac_f77_dm_save_LIBS

fi
{ echo "$as_me:$LINENO: result: $ac_cv_f77_dummy_main" >&5
echo "${ECHO_T}$ac_cv_f77_dummy_main" >&6; }
F77_DUMMY_MAIN=$ac_cv_f77_dummy_main
if test "$F77_DUMMY_MAIN" != unknown; then
  if test $F77_DUMMY_MAIN != none; then

cat >>confdefs.h <<_ACEOF
#define F77_DUMMY_MAIN $F77_DUMMY_MAIN
_ACEOF

  if test "x$ac_cv_fc_dummy_main" = "x$ac_cv_f77_dummy_main"; then

cat >>confdefs.h <<\_ACEOF
#define FC_DUMMY_MAIN_EQ_F77 1
_ACEOF

  fi
fi
else
  { { echo "$as_me:$LINENO: error: linking to Fortran libraries from C fails
See \`config.log' for more details." >&5
echo "$as_me: error: linking to Fortran libraries from C fails
See \`config.log' for more details." >&2;}
   { (exit 1); exit 1; }; }
fi


ac_ext=c
ac_cpp='$CPP $CPPFLAGS'
ac_compile='$CC -c $CFLAGS $CPPFLAGS conftest.$ac_ext >&5'
ac_link='$CC -o conftest$ac_exeext $CFLAGS $CPPFLAGS $LDFLAGS conftest.$ac_ext $LIBS >&5'
ac_compiler_gnu=$ac_cv_c_compiler_gnu

ac_ext=f
ac_compile='$F77 -c $FFLAGS conftest.$ac_ext >&5'
ac_link='$F77 -o conftest$ac_exeext $FFLAGS $LDFLAGS conftest.$ac_ext $LIBS >&5'
ac_compiler_gnu=$ac_cv_f77_compiler_gnu
{ echo "$as_me:$LINENO: checking for Fortran 77 name-mangling scheme" >&5
echo $ECHO_N "checking for Fortran 77 name-mangling scheme... $ECHO_C" >&6; }
if test "${ac_cv_f77_mangling+set}" = set; then
  echo $ECHO_N "(cached) $ECHO_C" >&6
else
  cat >conftest.$ac_ext <<_ACEOF
      subroutine foobar()
      return
      end
      subroutine foo_bar()
      return
      end
_ACEOF
rm -f conftest.$ac_objext
if { (ac_try="$ac_compile"
case "(($ac_try" in
  *\"* | *\`* | *\\*) ac_try_echo=\$ac_try;;
  *) ac_try_echo=$ac_try;;
esac
eval "echo \"\$as_me:$LINENO: $ac_try_echo\"") >&5
  (eval "$ac_compile") 2>conftest.er1
  ac_status=$?
  grep -v '^ *+' conftest.er1 >conftest.err
  rm -f conftest.er1
  cat conftest.err >&5
  echo "$as_me:$LINENO: \$? = $ac_status" >&5
  (exit $ac_status); } && {
	 test -z "$ac_f77_werror_flag" ||
	 test ! -s conftest.err
       } && test -s conftest.$ac_objext; then
  mv conftest.$ac_objext cfortran_test.$ac_objext

  ac_save_LIBS=$LIBS
  LIBS="cfortran_test.$ac_objext $LIBS $FLIBS"

  ac_ext=c
ac_cpp='$CPP $CPPFLAGS'
ac_compile='$CC -c $CFLAGS $CPPFLAGS conftest.$ac_ext >&5'
ac_link='$CC -o conftest$ac_exeext $CFLAGS $CPPFLAGS $LDFLAGS conftest.$ac_ext $LIBS >&5'
ac_compiler_gnu=$ac_cv_c_compiler_gnu
  ac_success=no
  for ac_foobar in foobar FOOBAR; do
    for ac_underscore in "" "_"; do
      ac_func="$ac_foobar$ac_underscore"
      cat >conftest.$ac_ext <<_ACEOF
/* confdefs.h.  */
_ACEOF
cat confdefs.h >>conftest.$ac_ext
cat >>conftest.$ac_ext <<_ACEOF
/* end confdefs.h.  */

/* Override any GCC internal prototype to avoid an error.
   Use char because int might match the return type of a GCC
   builtin and then its argument prototype would still apply.  */
#ifdef __cplusplus
extern "C"
#endif
char $ac_func ();
#ifdef F77_DUMMY_MAIN

#  ifdef __cplusplus
     extern "C"
#  endif
   int F77_DUMMY_MAIN() { return 1; }

#endif
int
main ()
{
return $ac_func ();
  ;
  return 0;
}
_ACEOF
rm -f conftest.$ac_objext conftest$ac_exeext
if { (ac_try="$ac_link"
case "(($ac_try" in
  *\"* | *\`* | *\\*) ac_try_echo=\$ac_try;;
  *) ac_try_echo=$ac_try;;
esac
eval "echo \"\$as_me:$LINENO: $ac_try_echo\"") >&5
  (eval "$ac_link") 2>conftest.er1
  ac_status=$?
  grep -v '^ *+' conftest.er1 >conftest.err
  rm -f conftest.er1
  cat conftest.err >&5
  echo "$as_me:$LINENO: \$? = $ac_status" >&5
  (exit $ac_status); } && {
	 test -z "$ac_c_werror_flag" ||
	 test ! -s conftest.err
       } && test -s conftest$ac_exeext &&
       $as_test_x conftest$ac_exeext; then
  ac_success=yes; break 2
else
  echo "$as_me: failed program was:" >&5
sed 's/^/| /' conftest.$ac_ext >&5


fi

rm -f core conftest.err conftest.$ac_objext conftest_ipa8_conftest.oo \
      conftest$ac_exeext conftest.$ac_ext
    done
  done
  ac_ext=f
ac_compile='$F77 -c $FFLAGS conftest.$ac_ext >&5'
ac_link='$F77 -o conftest$ac_exeext $FFLAGS $LDFLAGS conftest.$ac_ext $LIBS >&5'
ac_compiler_gnu=$ac_cv_f77_compiler_gnu

  if test "$ac_success" = "yes"; then
     case $ac_foobar in
	foobar)
	   ac_case=lower
	   ac_foo_bar=foo_bar
	   ;;
	FOOBAR)
	   ac_case=upper
	   ac_foo_bar=FOO_BAR
	   ;;
     esac

     ac_ext=c
ac_cpp='$CPP $CPPFLAGS'
ac_compile='$CC -c $CFLAGS $CPPFLAGS conftest.$ac_ext >&5'
ac_link='$CC -o conftest$ac_exeext $CFLAGS $CPPFLAGS $LDFLAGS conftest.$ac_ext $LIBS >&5'
ac_compiler_gnu=$ac_cv_c_compiler_gnu
     ac_success_extra=no
     for ac_extra in "" "_"; do
	ac_func="$ac_foo_bar$ac_underscore$ac_extra"
	cat >conftest.$ac_ext <<_ACEOF
/* confdefs.h.  */
_ACEOF
cat confdefs.h >>conftest.$ac_ext
cat >>conftest.$ac_ext <<_ACEOF
/* end confdefs.h.  */

/* Override any GCC internal prototype to avoid an error.
   Use char because int might match the return type of a GCC
   builtin and then its argument prototype would still apply.  */
#ifdef __cplusplus
extern "C"
#endif
char $ac_func ();
#ifdef F77_DUMMY_MAIN

#  ifdef __cplusplus
     extern "C"
#  endif
   int F77_DUMMY_MAIN() { return 1; }

#endif
int
main ()
{
return $ac_func ();
  ;
  return 0;
}
_ACEOF
rm -f conftest.$ac_objext conftest$ac_exeext
if { (ac_try="$ac_link"
case "(($ac_try" in
  *\"* | *\`* | *\\*) ac_try_echo=\$ac_try;;
  *) ac_try_echo=$ac_try;;
esac
eval "echo \"\$as_me:$LINENO: $ac_try_echo\"") >&5
  (eval "$ac_link") 2>conftest.er1
  ac_status=$?
  grep -v '^ *+' conftest.er1 >conftest.err
  rm -f conftest.er1
  cat conftest.err >&5
  echo "$as_me:$LINENO: \$? = $ac_status" >&5
  (exit $ac_status); } && {
	 test -z "$ac_c_werror_flag" ||
	 test ! -s conftest.err
       } && test -s conftest$ac_exeext &&
       $as_test_x conftest$ac_exeext; then
  ac_success_extra=yes; break
else
  echo "$as_me: failed program was:" >&5
sed 's/^/| /' conftest.$ac_ext >&5


fi

rm -f core conftest.err conftest.$ac_objext conftest_ipa8_conftest.oo \
      conftest$ac_exeext conftest.$ac_ext
     done
     ac_ext=f
ac_compile='$F77 -c $FFLAGS conftest.$ac_ext >&5'
ac_link='$F77 -o conftest$ac_exeext $FFLAGS $LDFLAGS conftest.$ac_ext $LIBS >&5'
ac_compiler_gnu=$ac_cv_f77_compiler_gnu

     if test "$ac_success_extra" = "yes"; then
	ac_cv_f77_mangling="$ac_case case"
        if test -z "$ac_underscore"; then
           ac_cv_f77_mangling="$ac_cv_f77_mangling, no underscore"
	else
           ac_cv_f77_mangling="$ac_cv_f77_mangling, underscore"
        fi
        if test -z "$ac_extra"; then
           ac_cv_f77_mangling="$ac_cv_f77_mangling, no extra underscore"
	else
           ac_cv_f77_mangling="$ac_cv_f77_mangling, extra underscore"
        fi
      else
	ac_cv_f77_mangling="unknown"
      fi
  else
     ac_cv_f77_mangling="unknown"
  fi

  LIBS=$ac_save_LIBS
  rm -f cfortran_test* conftest*
else
  echo "$as_me: failed program was:" >&5
sed 's/^/| /' conftest.$ac_ext >&5

	{ { echo "$as_me:$LINENO: error: cannot compile a simple Fortran program
See \`config.log' for more details." >&5
echo "$as_me: error: cannot compile a simple Fortran program
See \`config.log' for more details." >&2;}
   { (exit 1); exit 1; }; }
fi

rm -f core conftest.err conftest.$ac_objext conftest.$ac_ext

fi
{ echo "$as_me:$LINENO: result: $ac_cv_f77_mangling" >&5
echo "${ECHO_T}$ac_cv_f77_mangling" >&6; }

ac_ext=c
ac_cpp='$CPP $CPPFLAGS'
ac_compile='$CC -c $CFLAGS $CPPFLAGS conftest.$ac_ext >&5'
ac_link='$CC -o conftest$ac_exeext $CFLAGS $CPPFLAGS $LDFLAGS conftest.$ac_ext $LIBS >&5'
ac_compiler_gnu=$ac_cv_c_compiler_gnu

ac_ext=f
ac_compile='$F77 -c $FFLAGS conftest.$ac_ext >&5'
ac_link='$F77 -o conftest$ac_exeext $FFLAGS $LDFLAGS conftest.$ac_ext $LIBS >&5'
ac_compiler_gnu=$ac_cv_f77_compiler_gnu


case $ac_cv_f77_mangling in
  "lower case, no underscore, no extra underscore")
          cat >>confdefs.h <<\_ACEOF
#define F77_FUNC(name,NAME) name
_ACEOF

          cat >>confdefs.h <<\_ACEOF
#define F77_FUNC_(name,NAME) name
_ACEOF
 ;;
  "lower case, no underscore, extra underscore")
          cat >>confdefs.h <<\_ACEOF
#define F77_FUNC(name,NAME) name
_ACEOF

          cat >>confdefs.h <<\_ACEOF
#define F77_FUNC_(name,NAME) name ## _
_ACEOF
 ;;
  "lower case, underscore, no extra underscore")
          cat >>confdefs.h <<\_ACEOF
#define F77_FUNC(name,NAME) name ## _
_ACEOF

          cat >>confdefs.h <<\_ACEOF
#define F77_FUNC_(name,NAME) name ## _
_ACEOF
 ;;
  "lower case, underscore, extra underscore")
          cat >>confdefs.h <<\_ACEOF
#define F77_FUNC(name,NAME) name ## _
_ACEOF

          cat >>confdefs.h <<\_ACEOF
#define F77_FUNC_(name,NAME) name ## __
_ACEOF
 ;;
  "upper case, no underscore, no extra underscore")
          cat >>confdefs.h <<\_ACEOF
#define F77_FUNC(name,NAME) NAME
_ACEOF

          cat >>confdefs.h <<\_ACEOF
#define F77_FUNC_(name,NAME) NAME
_ACEOF
 ;;
  "upper case, no underscore, extra underscore")
          cat >>confdefs.h <<\_ACEOF
#define F77_FUNC(name,NAME) NAME
_ACEOF

          cat >>confdefs.h <<\_ACEOF
#define F77_FUNC_(name,NAME) NAME ## _
_ACEOF
 ;;
  "upper case, underscore, no extra underscore")
          cat >>confdefs.h <<\_ACEOF
#define F77_FUNC(name,NAME) NAME ## _
_ACEOF

          cat >>confdefs.h <<\_ACEOF
#define F77_FUNC_(name,NAME) NAME ## _
_ACEOF
 ;;
  "upper case, underscore, extra underscore")
          cat >>confdefs.h <<\_ACEOF
#define F77_FUNC(name,NAME) NAME ## _
_ACEOF

          cat >>confdefs.h <<\_ACEOF
#define F77_FUNC_(name,NAME) NAME ## __
_ACEOF
 ;;
  *)
          { echo "$as_me:$LINENO: WARNING: unknown Fortran name-mangling scheme" >&5
echo "$as_me: WARNING: unknown Fortran name-mangling scheme" >&2;}
          ;;
esac

ac_ext=c
ac_cpp='$CPP $CPPFLAGS'
ac_compile='$CC -c $CFLAGS $CPPFLAGS conftest.$ac_ext >&5'
ac_link='$CC -o conftest$ac_exeext $CFLAGS $CPPFLAGS $LDFLAGS conftest.$ac_ext $LIBS >&5'
ac_compiler_gnu=$ac_cv_c_compiler_gnu


# Check for standard libraries
ac_ext=c
ac_cpp='$CPP $CPPFLAGS'
ac_compile='$CC -c $CFLAGS $CPPFLAGS conftest.$ac_ext >&5'
ac_link='$CC -o conftest$ac_exeext $CFLAGS $CPPFLAGS $LDFLAGS conftest.$ac_ext $LIBS >&5'
ac_compiler_gnu=$ac_cv_c_compiler_gnu


{ echo "$as_me:$LINENO: checking for main in -lstdc++" >&5
echo $ECHO_N "checking for main in -lstdc++... $ECHO_C" >&6; }
if test "${ac_cv_lib_stdcpp_main+set}" = set; then
  echo $ECHO_N "(cached) $ECHO_C" >&6
else
  ac_check_lib_save_LIBS=$LIBS
LIBS="-lstdc++  $LIBS"
cat >conftest.$ac_ext <<_ACEOF
/* confdefs.h.  */
_ACEOF
cat confdefs.h >>conftest.$ac_ext
cat >>conftest.$ac_ext <<_ACEOF
/* end confdefs.h.  */


#ifdef F77_DUMMY_MAIN

#  ifdef __cplusplus
     extern "C"
#  endif
   int F77_DUMMY_MAIN() { return 1; }

#endif
int
main ()
{
return main ();
  ;
  return 0;
}
_ACEOF
rm -f conftest.$ac_objext conftest$ac_exeext
if { (ac_try="$ac_link"
case "(($ac_try" in
  *\"* | *\`* | *\\*) ac_try_echo=\$ac_try;;
  *) ac_try_echo=$ac_try;;
esac
eval "echo \"\$as_me:$LINENO: $ac_try_echo\"") >&5
  (eval "$ac_link") 2>conftest.er1
  ac_status=$?
  grep -v '^ *+' conftest.er1 >conftest.err
  rm -f conftest.er1
  cat conftest.err >&5
  echo "$as_me:$LINENO: \$? = $ac_status" >&5
  (exit $ac_status); } && {
	 test -z "$ac_c_werror_flag" ||
	 test ! -s conftest.err
       } && test -s conftest$ac_exeext &&
       $as_test_x conftest$ac_exeext; then
  ac_cv_lib_stdcpp_main=yes
else
  echo "$as_me: failed program was:" >&5
sed 's/^/| /' conftest.$ac_ext >&5

	ac_cv_lib_stdcpp_main=no
fi

rm -f core conftest.err conftest.$ac_objext conftest_ipa8_conftest.oo \
      conftest$ac_exeext conftest.$ac_ext
LIBS=$ac_check_lib_save_LIBS
fi
{ echo "$as_me:$LINENO: result: $ac_cv_lib_stdcpp_main" >&5
echo "${ECHO_T}$ac_cv_lib_stdcpp_main" >&6; }
if test $ac_cv_lib_stdcpp_main = yes; then
  cat >>confdefs.h <<_ACEOF
#define HAVE_LIBSTDC__ 1
_ACEOF

  LIBS="-lstdc++ $LIBS"

fi


{ echo "$as_me:$LINENO: checking for main in -lm" >&5
echo $ECHO_N "checking for main in -lm... $ECHO_C" >&6; }
if test "${ac_cv_lib_m_main+set}" = set; then
  echo $ECHO_N "(cached) $ECHO_C" >&6
else
  ac_check_lib_save_LIBS=$LIBS
LIBS="-lm  $LIBS"
cat >conftest.$ac_ext <<_ACEOF
/* confdefs.h.  */
_ACEOF
cat confdefs.h >>conftest.$ac_ext
cat >>conftest.$ac_ext <<_ACEOF
/* end confdefs.h.  */


#ifdef F77_DUMMY_MAIN

#  ifdef __cplusplus
     extern "C"
#  endif
   int F77_DUMMY_MAIN() { return 1; }

#endif
int
main ()
{
return main ();
  ;
  return 0;
}
_ACEOF
rm -f conftest.$ac_objext conftest$ac_exeext
if { (ac_try="$ac_link"
case "(($ac_try" in
  *\"* | *\`* | *\\*) ac_try_echo=\$ac_try;;
  *) ac_try_echo=$ac_try;;
esac
eval "echo \"\$as_me:$LINENO: $ac_try_echo\"") >&5
  (eval "$ac_link") 2>conftest.er1
  ac_status=$?
  grep -v '^ *+' conftest.er1 >conftest.err
  rm -f conftest.er1
  cat conftest.err >&5
  echo "$as_me:$LINENO: \$? = $ac_status" >&5
  (exit $ac_status); } && {
	 test -z "$ac_c_werror_flag" ||
	 test ! -s conftest.err
       } && test -s conftest$ac_exeext &&
       $as_test_x conftest$ac_exeext; then
  ac_cv_lib_m_main=yes
else
  echo "$as_me: failed program was:" >&5
sed 's/^/| /' conftest.$ac_ext >&5

	ac_cv_lib_m_main=no
fi

rm -f core conftest.err conftest.$ac_objext conftest_ipa8_conftest.oo \
      conftest$ac_exeext conftest.$ac_ext
LIBS=$ac_check_lib_save_LIBS
fi
{ echo "$as_me:$LINENO: result: $ac_cv_lib_m_main" >&5
echo "${ECHO_T}$ac_cv_lib_m_main" >&6; }
if test $ac_cv_lib_m_main = yes; then
  cat >>confdefs.h <<_ACEOF
#define HAVE_LIBM 1
_ACEOF

  LIBS="-lm $LIBS"

fi


{ echo "$as_me:$LINENO: checking for main in -lpthread" >&5
echo $ECHO_N "checking for main in -lpthread... $ECHO_C" >&6; }
if test "${ac_cv_lib_pthread_main+set}" = set; then
  echo $ECHO_N "(cached) $ECHO_C" >&6
else
  ac_check_lib_save_LIBS=$LIBS
LIBS="-lpthread  $LIBS"
cat >conftest.$ac_ext <<_ACEOF
/* confdefs.h.  */
_ACEOF
cat confdefs.h >>conftest.$ac_ext
cat >>conftest.$ac_ext <<_ACEOF
/* end confdefs.h.  */


#ifdef F77_DUMMY_MAIN

#  ifdef __cplusplus
     extern "C"
#  endif
   int F77_DUMMY_MAIN() { return 1; }

#endif
int
main ()
{
return main ();
  ;
  return 0;
}
_ACEOF
rm -f conftest.$ac_objext conftest$ac_exeext
if { (ac_try="$ac_link"
case "(($ac_try" in
  *\"* | *\`* | *\\*) ac_try_echo=\$ac_try;;
  *) ac_try_echo=$ac_try;;
esac
eval "echo \"\$as_me:$LINENO: $ac_try_echo\"") >&5
  (eval "$ac_link") 2>conftest.er1
  ac_status=$?
  grep -v '^ *+' conftest.er1 >conftest.err
  rm -f conftest.er1
  cat conftest.err >&5
  echo "$as_me:$LINENO: \$? = $ac_status" >&5
  (exit $ac_status); } && {
	 test -z "$ac_c_werror_flag" ||
	 test ! -s conftest.err
       } && test -s conftest$ac_exeext &&
       $as_test_x conftest$ac_exeext; then
  ac_cv_lib_pthread_main=yes
else
  echo "$as_me: failed program was:" >&5
sed 's/^/| /' conftest.$ac_ext >&5

	ac_cv_lib_pthread_main=no
fi

rm -f core conftest.err conftest.$ac_objext conftest_ipa8_conftest.oo \
      conftest$ac_exeext conftest.$ac_ext
LIBS=$ac_check_lib_save_LIBS
fi
{ echo "$as_me:$LINENO: result: $ac_cv_lib_pthread_main" >&5
echo "${ECHO_T}$ac_cv_lib_pthread_main" >&6; }
if test $ac_cv_lib_pthread_main = yes; then
  cat >>confdefs.h <<_ACEOF
#define HAVE_LIBPTHREAD 1
_ACEOF

  LIBS="-lpthread $LIBS"

fi


LIBS="$LAPACK_LIBS $BLAS_LIBS $LIBS $FCLIBS $FLIBS"

LINKER=$CXX

# Check whether --enable-shared was given.
if test "${enable_shared+set}" = set; then
  enableval=$enable_shared;
fi


if test "$enable_shared" = "yes" ; then
  PIC_FLAG="-fPIC"
  FCFLAGS="$FCFLAGS $PIC_FLAG"
  CXXFLAGS="$CXXFLAGS $PIC_FLAG"
else
  PIC_FLAG=""
fi

##
## what compiler options work
##
if test "$FC" = "g95"; then
    FCFLAGS="-ffast-math -fno-second-underscore $FCFLAGS"
fi

if test "$FC" = "gfortran"; then
    if test "$enable_debugging" = "yes" ; then
	FCFLAGS="-frecord-marker=4 $FCFLAGS"
    else
	FCFLAGS="-ffast-math -frecord-marker=4 $FCFLAGS"
    fi
    CPPFLAGS="$CPPFLAGS -DUSING_GFORTRAN=1"
fi

ac_ext=f
ac_compile='$F77 -c $FFLAGS conftest.$ac_ext >&5'
ac_link='$F77 -o conftest$ac_exeext $FFLAGS $LDFLAGS conftest.$ac_ext $LIBS >&5'
ac_compiler_gnu=$ac_cv_f77_compiler_gnu

{ echo "$as_me:$LINENO: checking how do we get fortran 77 to allow long lines" >&5
echo $ECHO_N "checking how do we get fortran 77 to allow long lines... $ECHO_C" >&6; }
old_FLAGS="$FFLAGS"
extended_source_flag=none
cat >conftest.$ac_ext <<_ACEOF
      program main

       PRINT*, "hello world                                                                                      "
      end
_ACEOF
rm -f conftest.$ac_objext
if { (ac_try="$ac_compile"
case "(($ac_try" in
  *\"* | *\`* | *\\*) ac_try_echo=\$ac_try;;
  *) ac_try_echo=$ac_try;;
esac
eval "echo \"\$as_me:$LINENO: $ac_try_echo\"") >&5
  (eval "$ac_compile") 2>conftest.er1
  ac_status=$?
  grep -v '^ *+' conftest.er1 >conftest.err
  rm -f conftest.er1
  cat conftest.err >&5
  echo "$as_me:$LINENO: \$? = $ac_status" >&5
  (exit $ac_status); } && {
	 test -z "$ac_f77_werror_flag" ||
	 test ! -s conftest.err
       } && test -s conftest.$ac_objext; then

  { echo "$as_me:$LINENO: result: no extra flags required" >&5
echo "${ECHO_T}no extra flags required" >&6; }
  extended_source_flag=happy

else
  echo "$as_me: failed program was:" >&5
sed 's/^/| /' conftest.$ac_ext >&5


fi

rm -f core conftest.err conftest.$ac_objext conftest.$ac_ext

if test "$extended_source_flag" != happy ; then
if test "$extended_source_flag" = none ; then
  FFLAGS="-extend_source"
  cat >conftest.$ac_ext <<_ACEOF
      program main

       PRINT*, "hello world                                                                                      "
      end
_ACEOF
rm -f conftest.$ac_objext
if { (ac_try="$ac_compile"
case "(($ac_try" in
  *\"* | *\`* | *\\*) ac_try_echo=\$ac_try;;
  *) ac_try_echo=$ac_try;;
esac
eval "echo \"\$as_me:$LINENO: $ac_try_echo\"") >&5
  (eval "$ac_compile") 2>conftest.er1
  ac_status=$?
  grep -v '^ *+' conftest.er1 >conftest.err
  rm -f conftest.er1
  cat conftest.err >&5
  echo "$as_me:$LINENO: \$? = $ac_status" >&5
  (exit $ac_status); } && {
	 test -z "$ac_f77_werror_flag" ||
	 test ! -s conftest.err
       } && test -s conftest.$ac_objext; then

  extended_source_flag=$FFLAGS
  { echo "$as_me:$LINENO: result: $FFLAGS" >&5
echo "${ECHO_T}$FFLAGS" >&6; }
  FFLAGS="$old_FLAGS $FFLAGS"

else
  echo "$as_me: failed program was:" >&5
sed 's/^/| /' conftest.$ac_ext >&5


fi

rm -f core conftest.err conftest.$ac_objext conftest.$ac_ext
fi
if test "$extended_source_flag" = none ; then
  FFLAGS="-132"
  cat >conftest.$ac_ext <<_ACEOF
      program main

       PRINT*, "hello world                                                                                      "
      end
_ACEOF
rm -f conftest.$ac_objext
if { (ac_try="$ac_compile"
case "(($ac_try" in
  *\"* | *\`* | *\\*) ac_try_echo=\$ac_try;;
  *) ac_try_echo=$ac_try;;
esac
eval "echo \"\$as_me:$LINENO: $ac_try_echo\"") >&5
  (eval "$ac_compile") 2>conftest.er1
  ac_status=$?
  grep -v '^ *+' conftest.er1 >conftest.err
  rm -f conftest.er1
  cat conftest.err >&5
  echo "$as_me:$LINENO: \$? = $ac_status" >&5
  (exit $ac_status); } && {
	 test -z "$ac_f77_werror_flag" ||
	 test ! -s conftest.err
       } && test -s conftest.$ac_objext; then

  extended_source_flag=$FFLAGS
  { echo "$as_me:$LINENO: result: $FFLAGS" >&5
echo "${ECHO_T}$FFLAGS" >&6; }
  FFLAGS="$old_FLAGS $FFLAGS"

else
  echo "$as_me: failed program was:" >&5
sed 's/^/| /' conftest.$ac_ext >&5


fi

rm -f core conftest.err conftest.$ac_objext conftest.$ac_ext
fi
if test "$extended_source_flag" = none ; then
  FFLAGS="-ffree-line-length-none -ffixed-line-length-none"
  cat >conftest.$ac_ext <<_ACEOF
      program main

       PRINT*, "hello world                                                                                      "
      end
_ACEOF
rm -f conftest.$ac_objext
if { (ac_try="$ac_compile"
case "(($ac_try" in
  *\"* | *\`* | *\\*) ac_try_echo=\$ac_try;;
  *) ac_try_echo=$ac_try;;
esac
eval "echo \"\$as_me:$LINENO: $ac_try_echo\"") >&5
  (eval "$ac_compile") 2>conftest.er1
  ac_status=$?
  grep -v '^ *+' conftest.er1 >conftest.err
  rm -f conftest.er1
  cat conftest.err >&5
  echo "$as_me:$LINENO: \$? = $ac_status" >&5
  (exit $ac_status); } && {
	 test -z "$ac_f77_werror_flag" ||
	 test ! -s conftest.err
       } && test -s conftest.$ac_objext; then

  extended_source_flag=$FFLAGS
  { echo "$as_me:$LINENO: result: $FFLAGS" >&5
echo "${ECHO_T}$FFLAGS" >&6; }
  FFLAGS="$old_FLAGS $FFLAGS"

else
  echo "$as_me: failed program was:" >&5
sed 's/^/| /' conftest.$ac_ext >&5


fi

rm -f core conftest.err conftest.$ac_objext conftest.$ac_ext
fi
if test "$extended_source_flag" = none ; then
  FFLAGS="-ffixed-line-length-huge -ffree-line-length-huge"
  cat >conftest.$ac_ext <<_ACEOF
      program main

       PRINT*, "hello world                                                                                      "
      end
_ACEOF
rm -f conftest.$ac_objext
if { (ac_try="$ac_compile"
case "(($ac_try" in
  *\"* | *\`* | *\\*) ac_try_echo=\$ac_try;;
  *) ac_try_echo=$ac_try;;
esac
eval "echo \"\$as_me:$LINENO: $ac_try_echo\"") >&5
  (eval "$ac_compile") 2>conftest.er1
  ac_status=$?
  grep -v '^ *+' conftest.er1 >conftest.err
  rm -f conftest.er1
  cat conftest.err >&5
  echo "$as_me:$LINENO: \$? = $ac_status" >&5
  (exit $ac_status); } && {
	 test -z "$ac_f77_werror_flag" ||
	 test ! -s conftest.err
       } && test -s conftest.$ac_objext; then

  extended_source_flag=$FFLAGS
  { echo "$as_me:$LINENO: result: $FFLAGS" >&5
echo "${ECHO_T}$FFLAGS" >&6; }
  FFLAGS="$old_FLAGS $FFLAGS"

else
  echo "$as_me: failed program was:" >&5
sed 's/^/| /' conftest.$ac_ext >&5


fi

rm -f core conftest.err conftest.$ac_objext conftest.$ac_ext
fi
if test "$extended_source_flag" = none ; then
  FFLAGS="-ffixed-line-length-132 -ffree-line-length-huge"
  cat >conftest.$ac_ext <<_ACEOF
      program main

       PRINT*, "hello world                                                                                      "
      end
_ACEOF
rm -f conftest.$ac_objext
if { (ac_try="$ac_compile"
case "(($ac_try" in
  *\"* | *\`* | *\\*) ac_try_echo=\$ac_try;;
  *) ac_try_echo=$ac_try;;
esac
eval "echo \"\$as_me:$LINENO: $ac_try_echo\"") >&5
  (eval "$ac_compile") 2>conftest.er1
  ac_status=$?
  grep -v '^ *+' conftest.er1 >conftest.err
  rm -f conftest.er1
  cat conftest.err >&5
  echo "$as_me:$LINENO: \$? = $ac_status" >&5
  (exit $ac_status); } && {
	 test -z "$ac_f77_werror_flag" ||
	 test ! -s conftest.err
       } && test -s conftest.$ac_objext; then

  extended_source_flag=$FFLAGS
  { echo "$as_me:$LINENO: result: $FFLAGS" >&5
echo "${ECHO_T}$FFLAGS" >&6; }
  FFLAGS="$old_FLAGS $FFLAGS"

else
  echo "$as_me: failed program was:" >&5
sed 's/^/| /' conftest.$ac_ext >&5


fi

rm -f core conftest.err conftest.$ac_objext conftest.$ac_ext
fi
if test "$extended_source_flag" = none ; then
  FFLAGS="-ffixed-line-length-132"
  cat >conftest.$ac_ext <<_ACEOF
      program main

       PRINT*, "hello world                                                                                      "
      end
_ACEOF
rm -f conftest.$ac_objext
if { (ac_try="$ac_compile"
case "(($ac_try" in
  *\"* | *\`* | *\\*) ac_try_echo=\$ac_try;;
  *) ac_try_echo=$ac_try;;
esac
eval "echo \"\$as_me:$LINENO: $ac_try_echo\"") >&5
  (eval "$ac_compile") 2>conftest.er1
  ac_status=$?
  grep -v '^ *+' conftest.er1 >conftest.err
  rm -f conftest.er1
  cat conftest.err >&5
  echo "$as_me:$LINENO: \$? = $ac_status" >&5
  (exit $ac_status); } && {
	 test -z "$ac_f77_werror_flag" ||
	 test ! -s conftest.err
       } && test -s conftest.$ac_objext; then

  extended_source_flag=$FFLAGS
  { echo "$as_me:$LINENO: result: $FFLAGS" >&5
echo "${ECHO_T}$FFLAGS" >&6; }
  FFLAGS="$old_FLAGS $FFLAGS"

else
  echo "$as_me: failed program was:" >&5
sed 's/^/| /' conftest.$ac_ext >&5


fi

rm -f core conftest.err conftest.$ac_objext conftest.$ac_ext
fi
if test "$extended_source_flag" = none ; then
  FFLAGS="-Mextend"
  cat >conftest.$ac_ext <<_ACEOF
      program main

       PRINT*, "hello world                                                                                      "
      end
_ACEOF
rm -f conftest.$ac_objext
if { (ac_try="$ac_compile"
case "(($ac_try" in
  *\"* | *\`* | *\\*) ac_try_echo=\$ac_try;;
  *) ac_try_echo=$ac_try;;
esac
eval "echo \"\$as_me:$LINENO: $ac_try_echo\"") >&5
  (eval "$ac_compile") 2>conftest.er1
  ac_status=$?
  grep -v '^ *+' conftest.er1 >conftest.err
  rm -f conftest.er1
  cat conftest.err >&5
  echo "$as_me:$LINENO: \$? = $ac_status" >&5
  (exit $ac_status); } && {
	 test -z "$ac_f77_werror_flag" ||
	 test ! -s conftest.err
       } && test -s conftest.$ac_objext; then

  extended_source_flag=$FFLAGS
  { echo "$as_me:$LINENO: result: $FFLAGS" >&5
echo "${ECHO_T}$FFLAGS" >&6; }
  FFLAGS="$old_FLAGS $FFLAGS"

else
  echo "$as_me: failed program was:" >&5
sed 's/^/| /' conftest.$ac_ext >&5


fi

rm -f core conftest.err conftest.$ac_objext conftest.$ac_ext
fi
if test "$extended_source_flag" = none ; then
  FFLAGS="-qfixed=256"
  cat >conftest.$ac_ext <<_ACEOF
      program main

       PRINT*, "hello world                                                                                      "
      end
_ACEOF
rm -f conftest.$ac_objext
if { (ac_try="$ac_compile"
case "(($ac_try" in
  *\"* | *\`* | *\\*) ac_try_echo=\$ac_try;;
  *) ac_try_echo=$ac_try;;
esac
eval "echo \"\$as_me:$LINENO: $ac_try_echo\"") >&5
  (eval "$ac_compile") 2>conftest.er1
  ac_status=$?
  grep -v '^ *+' conftest.er1 >conftest.err
  rm -f conftest.er1
  cat conftest.err >&5
  echo "$as_me:$LINENO: \$? = $ac_status" >&5
  (exit $ac_status); } && {
	 test -z "$ac_f77_werror_flag" ||
	 test ! -s conftest.err
       } && test -s conftest.$ac_objext; then

    extended_source_flag=$FFLAGS
    { echo "$as_me:$LINENO: result: $FFLAGS" >&5
echo "${ECHO_T}$FFLAGS" >&6; }
    FFLAGS="$old_FLAGS $FFLAGS"

else
  echo "$as_me: failed program was:" >&5
sed 's/^/| /' conftest.$ac_ext >&5


fi

rm -f core conftest.err conftest.$ac_objext conftest.$ac_ext
fi
if test "$extended_source_flag" = none ; then
  FFLAGS="-e"
  cat >conftest.$ac_ext <<_ACEOF
      program main

       PRINT*, "hello world                                                                                      "
      end
_ACEOF
rm -f conftest.$ac_objext
if { (ac_try="$ac_compile"
case "(($ac_try" in
  *\"* | *\`* | *\\*) ac_try_echo=\$ac_try;;
  *) ac_try_echo=$ac_try;;
esac
eval "echo \"\$as_me:$LINENO: $ac_try_echo\"") >&5
  (eval "$ac_compile") 2>conftest.er1
  ac_status=$?
  grep -v '^ *+' conftest.er1 >conftest.err
  rm -f conftest.er1
  cat conftest.err >&5
  echo "$as_me:$LINENO: \$? = $ac_status" >&5
  (exit $ac_status); } && {
	 test -z "$ac_f77_werror_flag" ||
	 test ! -s conftest.err
       } && test -s conftest.$ac_objext; then

    extended_source_flag=$FFLAGS
    { echo "$as_me:$LINENO: result: $FFLAGS" >&5
echo "${ECHO_T}$FFLAGS" >&6; }
    FFLAGS="$old_FLAGS $FFLAGS"

else
  echo "$as_me: failed program was:" >&5
sed 's/^/| /' conftest.$ac_ext >&5


fi

rm -f core conftest.err conftest.$ac_objext conftest.$ac_ext
fi

if test "$extended_source_flag" = none ; then
  { echo "$as_me:$LINENO: result: we cannot" >&5
echo "${ECHO_T}we cannot" >&6; }
else
  FCFLAGS="$FCFLAGS $extended_source_flag"
fi
fi

ac_ext=c
ac_cpp='$CPP $CPPFLAGS'
ac_compile='$CC -c $CFLAGS $CPPFLAGS conftest.$ac_ext >&5'
ac_link='$CC -o conftest$ac_exeext $CFLAGS $CPPFLAGS $LDFLAGS conftest.$ac_ext $LIBS >&5'
ac_compiler_gnu=$ac_cv_c_compiler_gnu


# Find a good install program.  We prefer a C program (faster),
# so one script is as good as another.  But avoid the broken or
# incompatible versions:
# SysV /etc/install, /usr/sbin/install
# SunOS /usr/etc/install
# IRIX /sbin/install
# AIX /bin/install
# AmigaOS /C/install, which installs bootblocks on floppy discs
# AIX 4 /usr/bin/installbsd, which doesn't work without a -g flag
# AFS /usr/afsws/bin/install, which mishandles nonexistent args
# SVR4 /usr/ucb/install, which tries to use the nonexistent group "staff"
# OS/2's system install, which has a completely different semantic
# ./install, which can be erroneously created by make from ./install.sh.
{ echo "$as_me:$LINENO: checking for a BSD-compatible install" >&5
echo $ECHO_N "checking for a BSD-compatible install... $ECHO_C" >&6; }
if test -z "$INSTALL"; then
if test "${ac_cv_path_install+set}" = set; then
  echo $ECHO_N "(cached) $ECHO_C" >&6
else
  as_save_IFS=$IFS; IFS=$PATH_SEPARATOR
for as_dir in $PATH
do
  IFS=$as_save_IFS
  test -z "$as_dir" && as_dir=.
  # Account for people who put trailing slashes in PATH elements.
case $as_dir/ in
  ./ | .// | /cC/* | \
  /etc/* | /usr/sbin/* | /usr/etc/* | /sbin/* | /usr/afsws/bin/* | \
  ?:\\/os2\\/install\\/* | ?:\\/OS2\\/INSTALL\\/* | \
  /usr/ucb/* ) ;;
  *)
    # OSF1 and SCO ODT 3.0 have their own names for install.
    # Don't use installbsd from OSF since it installs stuff as root
    # by default.
    for ac_prog in ginstall scoinst install; do
      for ac_exec_ext in '' $ac_executable_extensions; do
	if { test -f "$as_dir/$ac_prog$ac_exec_ext" && $as_test_x "$as_dir/$ac_prog$ac_exec_ext"; }; then
	  if test $ac_prog = install &&
	    grep dspmsg "$as_dir/$ac_prog$ac_exec_ext" >/dev/null 2>&1; then
	    # AIX install.  It has an incompatible calling convention.
	    :
	  elif test $ac_prog = install &&
	    grep pwplus "$as_dir/$ac_prog$ac_exec_ext" >/dev/null 2>&1; then
	    # program-specific install script used by HP pwplus--don't use.
	    :
	  else
	    ac_cv_path_install="$as_dir/$ac_prog$ac_exec_ext -c"
	    break 3
	  fi
	fi
      done
    done
    ;;
esac
done
IFS=$as_save_IFS


fi
  if test "${ac_cv_path_install+set}" = set; then
    INSTALL=$ac_cv_path_install
  else
    # As a last resort, use the slow shell script.  Don't cache a
    # value for INSTALL within a source directory, because that will
    # break other packages using the cache if that directory is
    # removed, or if the value is a relative name.
    INSTALL=$ac_install_sh
  fi
fi
{ echo "$as_me:$LINENO: result: $INSTALL" >&5
echo "${ECHO_T}$INSTALL" >&6; }

# Use test -z because SunOS4 sh mishandles braces in ${var-val}.
# It thinks the first close brace ends the variable substitution.
test -z "$INSTALL_PROGRAM" && INSTALL_PROGRAM='${INSTALL}'

test -z "$INSTALL_SCRIPT" && INSTALL_SCRIPT='${INSTALL}'

test -z "$INSTALL_DATA" && INSTALL_DATA='${INSTALL} -m 644'

# Extract the first word of "gmake", so it can be a program name with args.
set dummy gmake; ac_word=$2
{ echo "$as_me:$LINENO: checking for $ac_word" >&5
echo $ECHO_N "checking for $ac_word... $ECHO_C" >&6; }
if test "${ac_cv_prog_MAKE+set}" = set; then
  echo $ECHO_N "(cached) $ECHO_C" >&6
else
  if test -n "$MAKE"; then
  ac_cv_prog_MAKE="$MAKE" # Let the user override the test.
else
as_save_IFS=$IFS; IFS=$PATH_SEPARATOR
for as_dir in $PATH
do
  IFS=$as_save_IFS
  test -z "$as_dir" && as_dir=.
  for ac_exec_ext in '' $ac_executable_extensions; do
  if { test -f "$as_dir/$ac_word$ac_exec_ext" && $as_test_x "$as_dir/$ac_word$ac_exec_ext"; }; then
    ac_cv_prog_MAKE="gmake"
    echo "$as_me:$LINENO: found $as_dir/$ac_word$ac_exec_ext" >&5
    break 2
  fi
done
done
IFS=$as_save_IFS

  test -z "$ac_cv_prog_MAKE" && ac_cv_prog_MAKE="make"
fi
fi
MAKE=$ac_cv_prog_MAKE
if test -n "$MAKE"; then
  { echo "$as_me:$LINENO: result: $MAKE" >&5
echo "${ECHO_T}$MAKE" >&6; }
else
  { echo "$as_me:$LINENO: result: no" >&5
echo "${ECHO_T}no" >&6; }
fi


# Set default for ARFLAGS, since autoconf does not have a macro for
# it. This allows people to set it when running configure or make.
# Extract the first word of "ar", so it can be a program name with args.
set dummy ar; ac_word=$2
{ echo "$as_me:$LINENO: checking for $ac_word" >&5
echo $ECHO_N "checking for $ac_word... $ECHO_C" >&6; }
if test "${ac_cv_prog_AR+set}" = set; then
  echo $ECHO_N "(cached) $ECHO_C" >&6
else
  if test -n "$AR"; then
  ac_cv_prog_AR="$AR" # Let the user override the test.
else
as_save_IFS=$IFS; IFS=$PATH_SEPARATOR
for as_dir in $PATH
do
  IFS=$as_save_IFS
  test -z "$as_dir" && as_dir=.
  for ac_exec_ext in '' $ac_executable_extensions; do
  if { test -f "$as_dir/$ac_word$ac_exec_ext" && $as_test_x "$as_dir/$ac_word$ac_exec_ext"; }; then
    ac_cv_prog_AR="ar"
    echo "$as_me:$LINENO: found $as_dir/$ac_word$ac_exec_ext" >&5
    break 2
  fi
done
done
IFS=$as_save_IFS

fi
fi
AR=$ac_cv_prog_AR
if test -n "$AR"; then
  { echo "$as_me:$LINENO: result: $AR" >&5
echo "${ECHO_T}$AR" >&6; }
else
  { echo "$as_me:$LINENO: result: no" >&5
echo "${ECHO_T}no" >&6; }
fi


test -n "$ARFLAGS" || ARFLAGS="cr"
if test -n "$ac_tool_prefix"; then
  # Extract the first word of "${ac_tool_prefix}ranlib", so it can be a program name with args.
set dummy ${ac_tool_prefix}ranlib; ac_word=$2
{ echo "$as_me:$LINENO: checking for $ac_word" >&5
echo $ECHO_N "checking for $ac_word... $ECHO_C" >&6; }
if test "${ac_cv_prog_RANLIB+set}" = set; then
  echo $ECHO_N "(cached) $ECHO_C" >&6
else
  if test -n "$RANLIB"; then
  ac_cv_prog_RANLIB="$RANLIB" # Let the user override the test.
else
as_save_IFS=$IFS; IFS=$PATH_SEPARATOR
for as_dir in $PATH
do
  IFS=$as_save_IFS
  test -z "$as_dir" && as_dir=.
  for ac_exec_ext in '' $ac_executable_extensions; do
  if { test -f "$as_dir/$ac_word$ac_exec_ext" && $as_test_x "$as_dir/$ac_word$ac_exec_ext"; }; then
    ac_cv_prog_RANLIB="${ac_tool_prefix}ranlib"
    echo "$as_me:$LINENO: found $as_dir/$ac_word$ac_exec_ext" >&5
    break 2
  fi
done
done
IFS=$as_save_IFS

fi
fi
RANLIB=$ac_cv_prog_RANLIB
if test -n "$RANLIB"; then
  { echo "$as_me:$LINENO: result: $RANLIB" >&5
echo "${ECHO_T}$RANLIB" >&6; }
else
  { echo "$as_me:$LINENO: result: no" >&5
echo "${ECHO_T}no" >&6; }
fi


fi
if test -z "$ac_cv_prog_RANLIB"; then
  ac_ct_RANLIB=$RANLIB
  # Extract the first word of "ranlib", so it can be a program name with args.
set dummy ranlib; ac_word=$2
{ echo "$as_me:$LINENO: checking for $ac_word" >&5
echo $ECHO_N "checking for $ac_word... $ECHO_C" >&6; }
if test "${ac_cv_prog_ac_ct_RANLIB+set}" = set; then
  echo $ECHO_N "(cached) $ECHO_C" >&6
else
  if test -n "$ac_ct_RANLIB"; then
  ac_cv_prog_ac_ct_RANLIB="$ac_ct_RANLIB" # Let the user override the test.
else
as_save_IFS=$IFS; IFS=$PATH_SEPARATOR
for as_dir in $PATH
do
  IFS=$as_save_IFS
  test -z "$as_dir" && as_dir=.
  for ac_exec_ext in '' $ac_executable_extensions; do
  if { test -f "$as_dir/$ac_word$ac_exec_ext" && $as_test_x "$as_dir/$ac_word$ac_exec_ext"; }; then
    ac_cv_prog_ac_ct_RANLIB="ranlib"
    echo "$as_me:$LINENO: found $as_dir/$ac_word$ac_exec_ext" >&5
    break 2
  fi
done
done
IFS=$as_save_IFS

fi
fi
ac_ct_RANLIB=$ac_cv_prog_ac_ct_RANLIB
if test -n "$ac_ct_RANLIB"; then
  { echo "$as_me:$LINENO: result: $ac_ct_RANLIB" >&5
echo "${ECHO_T}$ac_ct_RANLIB" >&6; }
else
  { echo "$as_me:$LINENO: result: no" >&5
echo "${ECHO_T}no" >&6; }
fi

  if test "x$ac_ct_RANLIB" = x; then
    RANLIB=":"
  else
    case $cross_compiling:$ac_tool_warned in
yes:)
{ echo "$as_me:$LINENO: WARNING: In the future, Autoconf will not detect cross-tools
whose name does not start with the host triplet.  If you think this
configuration is useful to you, please write to autoconf@gnu.org." >&5
echo "$as_me: WARNING: In the future, Autoconf will not detect cross-tools
whose name does not start with the host triplet.  If you think this
configuration is useful to you, please write to autoconf@gnu.org." >&2;}
ac_tool_warned=yes ;;
esac
    RANLIB=$ac_ct_RANLIB
  fi
else
  RANLIB="$ac_cv_prog_RANLIB"
fi


# Check whether --enable-verbose was given.
if test "${enable_verbose+set}" = set; then
  enableval=$enable_verbose;
fi


if test "$enable_verbose" = "yes" ; then
   CPPFLAGS="$CPPFLAGS -DVERBOSE_MESSAGES=1"
fi

if test "$enable_debugging" = "yes" ; then
  CXXFLAGS="-g -O0 `echo $CXXFLAGS | sed 's/-O2//g'`"
  FCFLAGS="-g -O0 `echo $FCFLAGS | sed 's/-O2//g'`"

  if test "$fcompiler" = "ifort" ; then
    FCFLAGS="-C -traceback -check nooutput_conversion -check noarg_temp_created  ${FCFLAGS}"
    CXXFLAGS="-fno-omit-frame-pointer ${CXXFLAGS}"
  elif test "$fcompiler" = "gfortran" ; then
    FCFLAGS="-fbounds-check -Wall ${FCFLAGS}"
    CXXFLAGS="-fbounds-check -Wall ${CXXFLAGS}"
    LDFLAGS="-rdynamic ${LDFLAGS}"
  elif test "$fcompiler" = "g95" ; then
    FCFLAGS="-fbounds-check -ftrace=full ${FCFLAGS}"
  elif test "$fcompiler" = "sunf95" ; then
    FCFLAGS="-C -ftrap=invalid -fpover ${FCFLAGS}"
    CXXFLAGS="-ftrap=invalid ${CXXFLAGS}"
  else
    FCFLAGS="-C ${FCFLAGS}"
  fi

else
    { echo "$as_me:$LINENO: Setting optimisation flags" >&5
echo "$as_me: Setting optimisation flags" >&6;}
    CPPFLAGS="$CPPFLAGS -DNDEBUG=1"
    FCFLAGS="-O3 `echo $FCFLAGS | sed 's/-g -O2//g'`"
    CXXFLAGS="-O3 `echo $CXXFLAGS | sed 's/-g -O2//g'`"
fi

if test "$FC" = "ifc" ; then
  FCFLAGS="-implicitnone -w95 $FCFLAGS"
fi

#####
#
LIBS="$LIBS -L./lib"

##############################################################
# enable gprof profiling

# Check whether --enable-profiling was given.
if test "${enable_profiling+set}" = set; then
  enableval=$enable_profiling;
fi


if test "$enable_profiling" = "yes" ; then
  PROFILING_FLAG="-pg"
  CPPFLAGS="-pg $CPPFLAGS"
  FCFLAGS="-pg $FCFLAGS"

  LINKER="$LINKER -pg"
else
  PROFILING_FLAG=""
fi


VERSION=`svnversion .`

ac_config_files="$ac_config_files Makefile bin/spud-preprocess diamond/diamond/preprocess.py src/tests/Makefile diamond/setup.py examples/Makefile"

cat >confcache <<\_ACEOF
# This file is a shell script that caches the results of configure
# tests run on this system so they can be shared between configure
# scripts and configure runs, see configure's option --config-cache.
# It is not useful on other systems.  If it contains results you don't
# want to keep, you may remove or edit it.
#
# config.status only pays attention to the cache file if you give it
# the --recheck option to rerun configure.
#
# `ac_cv_env_foo' variables (set or unset) will be overridden when
# loading this file, other *unset* `ac_cv_foo' will be assigned the
# following values.

_ACEOF

# The following way of writing the cache mishandles newlines in values,
# but we know of no workaround that is simple, portable, and efficient.
# So, we kill variables containing newlines.
# Ultrix sh set writes to stderr and can't be redirected directly,
# and sets the high bit in the cache file unless we assign to the vars.
(
  for ac_var in `(set) 2>&1 | sed -n 's/^\([a-zA-Z_][a-zA-Z0-9_]*\)=.*/\1/p'`; do
    eval ac_val=\$$ac_var
    case $ac_val in #(
    *${as_nl}*)
      case $ac_var in #(
      *_cv_*) { echo "$as_me:$LINENO: WARNING: Cache variable $ac_var contains a newline." >&5
echo "$as_me: WARNING: Cache variable $ac_var contains a newline." >&2;} ;;
      esac
      case $ac_var in #(
      _ | IFS | as_nl) ;; #(
      *) $as_unset $ac_var ;;
      esac ;;
    esac
  done

  (set) 2>&1 |
    case $as_nl`(ac_space=' '; set) 2>&1` in #(
    *${as_nl}ac_space=\ *)
      # `set' does not quote correctly, so add quotes (double-quote
      # substitution turns \\\\ into \\, and sed turns \\ into \).
      sed -n \
	"s/'/'\\\\''/g;
	  s/^\\([_$as_cr_alnum]*_cv_[_$as_cr_alnum]*\\)=\\(.*\\)/\\1='\\2'/p"
      ;; #(
    *)
      # `set' quotes correctly as required by POSIX, so do not add quotes.
      sed -n "/^[_$as_cr_alnum]*_cv_[_$as_cr_alnum]*=/p"
      ;;
    esac |
    sort
) |
  sed '
     /^ac_cv_env_/b end
     t clear
     :clear
     s/^\([^=]*\)=\(.*[{}].*\)$/test "${\1+set}" = set || &/
     t end
     s/^\([^=]*\)=\(.*\)$/\1=${\1=\2}/
     :end' >>confcache
if diff "$cache_file" confcache >/dev/null 2>&1; then :; else
  if test -w "$cache_file"; then
    test "x$cache_file" != "x/dev/null" &&
      { echo "$as_me:$LINENO: updating cache $cache_file" >&5
echo "$as_me: updating cache $cache_file" >&6;}
    cat confcache >$cache_file
  else
    { echo "$as_me:$LINENO: not updating unwritable cache $cache_file" >&5
echo "$as_me: not updating unwritable cache $cache_file" >&6;}
  fi
fi
rm -f confcache

test "x$prefix" = xNONE && prefix=$ac_default_prefix
# Let make expand exec_prefix.
test "x$exec_prefix" = xNONE && exec_prefix='${prefix}'

DEFS=-DHAVE_CONFIG_H

ac_libobjs=
ac_ltlibobjs=
for ac_i in : $LIBOBJS; do test "x$ac_i" = x: && continue
  # 1. Remove the extension, and $U if already installed.
  ac_script='s/\$U\././;s/\.o$//;s/\.obj$//'
  ac_i=`echo "$ac_i" | sed "$ac_script"`
  # 2. Prepend LIBOBJDIR.  When used with automake>=1.10 LIBOBJDIR
  #    will be set to the directory where LIBOBJS objects are built.
  ac_libobjs="$ac_libobjs \${LIBOBJDIR}$ac_i\$U.$ac_objext"
  ac_ltlibobjs="$ac_ltlibobjs \${LIBOBJDIR}$ac_i"'$U.lo'
done
LIBOBJS=$ac_libobjs

LTLIBOBJS=$ac_ltlibobjs


: ${CONFIG_STATUS=./config.status}
ac_clean_files_save=$ac_clean_files
ac_clean_files="$ac_clean_files $CONFIG_STATUS"
{ echo "$as_me:$LINENO: creating $CONFIG_STATUS" >&5
echo "$as_me: creating $CONFIG_STATUS" >&6;}
cat >$CONFIG_STATUS <<_ACEOF
#! $SHELL
# Generated by $as_me.
# Run this file to recreate the current configuration.
# Compiler output produced by configure, useful for debugging
# configure, is in config.log if it exists.

debug=false
ac_cs_recheck=false
ac_cs_silent=false
SHELL=\${CONFIG_SHELL-$SHELL}
_ACEOF

cat >>$CONFIG_STATUS <<\_ACEOF
## --------------------- ##
## M4sh Initialization.  ##
## --------------------- ##

# Be more Bourne compatible
DUALCASE=1; export DUALCASE # for MKS sh
if test -n "${ZSH_VERSION+set}" && (emulate sh) >/dev/null 2>&1; then
  emulate sh
  NULLCMD=:
  # Zsh 3.x and 4.x performs word splitting on ${1+"$@"}, which
  # is contrary to our usage.  Disable this feature.
  alias -g '${1+"$@"}'='"$@"'
  setopt NO_GLOB_SUBST
else
  case `(set -o) 2>/dev/null` in
  *posix*) set -o posix ;;
esac

fi


# PATH needs CR
# Avoid depending upon Character Ranges.
as_cr_letters='abcdefghijklmnopqrstuvwxyz'
as_cr_LETTERS='ABCDEFGHIJKLMNOPQRSTUVWXYZ'
as_cr_Letters=$as_cr_letters$as_cr_LETTERS
as_cr_digits='0123456789'
as_cr_alnum=$as_cr_Letters$as_cr_digits

# The user is always right.
if test "${PATH_SEPARATOR+set}" != set; then
  echo "#! /bin/sh" >conf$$.sh
  echo  "exit 0"   >>conf$$.sh
  chmod +x conf$$.sh
  if (PATH="/nonexistent;."; conf$$.sh) >/dev/null 2>&1; then
    PATH_SEPARATOR=';'
  else
    PATH_SEPARATOR=:
  fi
  rm -f conf$$.sh
fi

# Support unset when possible.
if ( (MAIL=60; unset MAIL) || exit) >/dev/null 2>&1; then
  as_unset=unset
else
  as_unset=false
fi


# IFS
# We need space, tab and new line, in precisely that order.  Quoting is
# there to prevent editors from complaining about space-tab.
# (If _AS_PATH_WALK were called with IFS unset, it would disable word
# splitting by setting IFS to empty value.)
as_nl='
'
IFS=" ""	$as_nl"

# Find who we are.  Look in the path if we contain no directory separator.
case $0 in
  *[\\/]* ) as_myself=$0 ;;
  *) as_save_IFS=$IFS; IFS=$PATH_SEPARATOR
for as_dir in $PATH
do
  IFS=$as_save_IFS
  test -z "$as_dir" && as_dir=.
  test -r "$as_dir/$0" && as_myself=$as_dir/$0 && break
done
IFS=$as_save_IFS

     ;;
esac
# We did not find ourselves, most probably we were run as `sh COMMAND'
# in which case we are not to be found in the path.
if test "x$as_myself" = x; then
  as_myself=$0
fi
if test ! -f "$as_myself"; then
  echo "$as_myself: error: cannot find myself; rerun with an absolute file name" >&2
  { (exit 1); exit 1; }
fi

# Work around bugs in pre-3.0 UWIN ksh.
for as_var in ENV MAIL MAILPATH
do ($as_unset $as_var) >/dev/null 2>&1 && $as_unset $as_var
done
PS1='$ '
PS2='> '
PS4='+ '

# NLS nuisances.
for as_var in \
  LANG LANGUAGE LC_ADDRESS LC_ALL LC_COLLATE LC_CTYPE LC_IDENTIFICATION \
  LC_MEASUREMENT LC_MESSAGES LC_MONETARY LC_NAME LC_NUMERIC LC_PAPER \
  LC_TELEPHONE LC_TIME
do
  if (set +x; test -z "`(eval $as_var=C; export $as_var) 2>&1`"); then
    eval $as_var=C; export $as_var
  else
    ($as_unset $as_var) >/dev/null 2>&1 && $as_unset $as_var
  fi
done

# Required to use basename.
if expr a : '\(a\)' >/dev/null 2>&1 &&
   test "X`expr 00001 : '.*\(...\)'`" = X001; then
  as_expr=expr
else
  as_expr=false
fi

if (basename -- /) >/dev/null 2>&1 && test "X`basename -- / 2>&1`" = "X/"; then
  as_basename=basename
else
  as_basename=false
fi


# Name of the executable.
as_me=`$as_basename -- "$0" ||
$as_expr X/"$0" : '.*/\([^/][^/]*\)/*$' \| \
	 X"$0" : 'X\(//\)$' \| \
	 X"$0" : 'X\(/\)' \| . 2>/dev/null ||
echo X/"$0" |
    sed '/^.*\/\([^/][^/]*\)\/*$/{
	    s//\1/
	    q
	  }
	  /^X\/\(\/\/\)$/{
	    s//\1/
	    q
	  }
	  /^X\/\(\/\).*/{
	    s//\1/
	    q
	  }
	  s/.*/./; q'`

# CDPATH.
$as_unset CDPATH


  as_lineno_1=$LINENO
  as_lineno_2=$LINENO
  test "x$as_lineno_1" != "x$as_lineno_2" &&
  test "x`expr $as_lineno_1 + 1`" = "x$as_lineno_2" || {

  # Create $as_me.lineno as a copy of $as_myself, but with $LINENO
  # uniformly replaced by the line number.  The first 'sed' inserts a
  # line-number line after each line using $LINENO; the second 'sed'
  # does the real work.  The second script uses 'N' to pair each
  # line-number line with the line containing $LINENO, and appends
  # trailing '-' during substitution so that $LINENO is not a special
  # case at line end.
  # (Raja R Harinath suggested sed '=', and Paul Eggert wrote the
  # scripts with optimization help from Paolo Bonzini.  Blame Lee
  # E. McMahon (1931-1989) for sed's syntax.  :-)
  sed -n '
    p
    /[$]LINENO/=
  ' <$as_myself |
    sed '
      s/[$]LINENO.*/&-/
      t lineno
      b
      :lineno
      N
      :loop
      s/[$]LINENO\([^'$as_cr_alnum'_].*\n\)\(.*\)/\2\1\2/
      t loop
      s/-\n.*//
    ' >$as_me.lineno &&
  chmod +x "$as_me.lineno" ||
    { echo "$as_me: error: cannot create $as_me.lineno; rerun with a POSIX shell" >&2
   { (exit 1); exit 1; }; }

  # Don't try to exec as it changes $[0], causing all sort of problems
  # (the dirname of $[0] is not the place where we might find the
  # original and so on.  Autoconf is especially sensitive to this).
  . "./$as_me.lineno"
  # Exit status is that of the last command.
  exit
}


if (as_dir=`dirname -- /` && test "X$as_dir" = X/) >/dev/null 2>&1; then
  as_dirname=dirname
else
  as_dirname=false
fi

ECHO_C= ECHO_N= ECHO_T=
case `echo -n x` in
-n*)
  case `echo 'x\c'` in
  *c*) ECHO_T='	';;	# ECHO_T is single tab character.
  *)   ECHO_C='\c';;
  esac;;
*)
  ECHO_N='-n';;
esac

if expr a : '\(a\)' >/dev/null 2>&1 &&
   test "X`expr 00001 : '.*\(...\)'`" = X001; then
  as_expr=expr
else
  as_expr=false
fi

rm -f conf$$ conf$$.exe conf$$.file
if test -d conf$$.dir; then
  rm -f conf$$.dir/conf$$.file
else
  rm -f conf$$.dir
  mkdir conf$$.dir
fi
echo >conf$$.file
if ln -s conf$$.file conf$$ 2>/dev/null; then
  as_ln_s='ln -s'
  # ... but there are two gotchas:
  # 1) On MSYS, both `ln -s file dir' and `ln file dir' fail.
  # 2) DJGPP < 2.04 has no symlinks; `ln -s' creates a wrapper executable.
  # In both cases, we have to default to `cp -p'.
  ln -s conf$$.file conf$$.dir 2>/dev/null && test ! -f conf$$.exe ||
    as_ln_s='cp -p'
elif ln conf$$.file conf$$ 2>/dev/null; then
  as_ln_s=ln
else
  as_ln_s='cp -p'
fi
rm -f conf$$ conf$$.exe conf$$.dir/conf$$.file conf$$.file
rmdir conf$$.dir 2>/dev/null

if mkdir -p . 2>/dev/null; then
  as_mkdir_p=:
else
  test -d ./-p && rmdir ./-p
  as_mkdir_p=false
fi

if test -x / >/dev/null 2>&1; then
  as_test_x='test -x'
else
  if ls -dL / >/dev/null 2>&1; then
    as_ls_L_option=L
  else
    as_ls_L_option=
  fi
  as_test_x='
    eval sh -c '\''
      if test -d "$1"; then
        test -d "$1/.";
      else
	case $1 in
        -*)set "./$1";;
	esac;
	case `ls -ld'$as_ls_L_option' "$1" 2>/dev/null` in
	???[sx]*):;;*)false;;esac;fi
    '\'' sh
  '
fi
as_executable_p=$as_test_x

# Sed expression to map a string onto a valid CPP name.
as_tr_cpp="eval sed 'y%*$as_cr_letters%P$as_cr_LETTERS%;s%[^_$as_cr_alnum]%_%g'"

# Sed expression to map a string onto a valid variable name.
as_tr_sh="eval sed 'y%*+%pp%;s%[^_$as_cr_alnum]%_%g'"


exec 6>&1

# Save the log message, to keep $[0] and so on meaningful, and to
# report actual input values of CONFIG_FILES etc. instead of their
# values after options handling.
ac_log="
This file was extended by $as_me, which was
generated by GNU Autoconf 2.61.  Invocation command line was

  CONFIG_FILES    = $CONFIG_FILES
  CONFIG_HEADERS  = $CONFIG_HEADERS
  CONFIG_LINKS    = $CONFIG_LINKS
  CONFIG_COMMANDS = $CONFIG_COMMANDS
  $ $0 $@

on `(hostname || uname -n) 2>/dev/null | sed 1q`
"

_ACEOF

cat >>$CONFIG_STATUS <<_ACEOF
# Files that config.status was made for.
config_files="$ac_config_files"
config_headers="$ac_config_headers"

_ACEOF

cat >>$CONFIG_STATUS <<\_ACEOF
ac_cs_usage="\
\`$as_me' instantiates files from templates according to the
current configuration.

Usage: $0 [OPTIONS] [FILE]...

  -h, --help       print this help, then exit
  -V, --version    print version number and configuration settings, then exit
  -q, --quiet      do not print progress messages
  -d, --debug      don't remove temporary files
      --recheck    update $as_me by reconfiguring in the same conditions
  --file=FILE[:TEMPLATE]
		   instantiate the configuration file FILE
  --header=FILE[:TEMPLATE]
		   instantiate the configuration header FILE

Configuration files:
$config_files

Configuration headers:
$config_headers

Report bugs to <bug-autoconf@gnu.org>."

_ACEOF
cat >>$CONFIG_STATUS <<_ACEOF
ac_cs_version="\\
config.status
configured by $0, generated by GNU Autoconf 2.61,
  with options \\"`echo "$ac_configure_args" | sed 's/^ //; s/[\\""\`\$]/\\\\&/g'`\\"

Copyright (C) 2006 Free Software Foundation, Inc.
This config.status script is free software; the Free Software Foundation
gives unlimited permission to copy, distribute and modify it."

ac_pwd='$ac_pwd'
srcdir='$srcdir'
INSTALL='$INSTALL'
_ACEOF

cat >>$CONFIG_STATUS <<\_ACEOF
# If no file are specified by the user, then we need to provide default
# value.  By we need to know if files were specified by the user.
ac_need_defaults=:
while test $# != 0
do
  case $1 in
  --*=*)
    ac_option=`expr "X$1" : 'X\([^=]*\)='`
    ac_optarg=`expr "X$1" : 'X[^=]*=\(.*\)'`
    ac_shift=:
    ;;
  *)
    ac_option=$1
    ac_optarg=$2
    ac_shift=shift
    ;;
  esac

  case $ac_option in
  # Handling of the options.
  -recheck | --recheck | --rechec | --reche | --rech | --rec | --re | --r)
    ac_cs_recheck=: ;;
  --version | --versio | --versi | --vers | --ver | --ve | --v | -V )
    echo "$ac_cs_version"; exit ;;
  --debug | --debu | --deb | --de | --d | -d )
    debug=: ;;
  --file | --fil | --fi | --f )
    $ac_shift
    CONFIG_FILES="$CONFIG_FILES $ac_optarg"
    ac_need_defaults=false;;
  --header | --heade | --head | --hea )
    $ac_shift
    CONFIG_HEADERS="$CONFIG_HEADERS $ac_optarg"
    ac_need_defaults=false;;
  --he | --h)
    # Conflict between --help and --header
    { echo "$as_me: error: ambiguous option: $1
Try \`$0 --help' for more information." >&2
   { (exit 1); exit 1; }; };;
  --help | --hel | -h )
    echo "$ac_cs_usage"; exit ;;
  -q | -quiet | --quiet | --quie | --qui | --qu | --q \
  | -silent | --silent | --silen | --sile | --sil | --si | --s)
    ac_cs_silent=: ;;

  # This is an error.
  -*) { echo "$as_me: error: unrecognized option: $1
Try \`$0 --help' for more information." >&2
   { (exit 1); exit 1; }; } ;;

  *) ac_config_targets="$ac_config_targets $1"
     ac_need_defaults=false ;;

  esac
  shift
done

ac_configure_extra_args=

if $ac_cs_silent; then
  exec 6>/dev/null
  ac_configure_extra_args="$ac_configure_extra_args --silent"
fi

_ACEOF
cat >>$CONFIG_STATUS <<_ACEOF
if \$ac_cs_recheck; then
  echo "running CONFIG_SHELL=$SHELL $SHELL $0 "$ac_configure_args \$ac_configure_extra_args " --no-create --no-recursion" >&6
  CONFIG_SHELL=$SHELL
  export CONFIG_SHELL
  exec $SHELL "$0"$ac_configure_args \$ac_configure_extra_args --no-create --no-recursion
fi

_ACEOF
cat >>$CONFIG_STATUS <<\_ACEOF
exec 5>>config.log
{
  echo
  sed 'h;s/./-/g;s/^.../## /;s/...$/ ##/;p;x;p;x' <<_ASBOX
## Running $as_me. ##
_ASBOX
  echo "$ac_log"
} >&5

_ACEOF
cat >>$CONFIG_STATUS <<_ACEOF
_ACEOF

cat >>$CONFIG_STATUS <<\_ACEOF

# Handling of arguments.
for ac_config_target in $ac_config_targets
do
  case $ac_config_target in
    "include/spud_config.h") CONFIG_HEADERS="$CONFIG_HEADERS include/spud_config.h" ;;
    "Makefile") CONFIG_FILES="$CONFIG_FILES Makefile" ;;
    "bin/spud-preprocess") CONFIG_FILES="$CONFIG_FILES bin/spud-preprocess" ;;
    "diamond/diamond/preprocess.py") CONFIG_FILES="$CONFIG_FILES diamond/diamond/preprocess.py" ;;
    "src/tests/Makefile") CONFIG_FILES="$CONFIG_FILES src/tests/Makefile" ;;
    "diamond/setup.py") CONFIG_FILES="$CONFIG_FILES diamond/setup.py" ;;
    "examples/Makefile") CONFIG_FILES="$CONFIG_FILES examples/Makefile" ;;

  *) { { echo "$as_me:$LINENO: error: invalid argument: $ac_config_target" >&5
echo "$as_me: error: invalid argument: $ac_config_target" >&2;}
   { (exit 1); exit 1; }; };;
  esac
done


# If the user did not use the arguments to specify the items to instantiate,
# then the envvar interface is used.  Set only those that are not.
# We use the long form for the default assignment because of an extremely
# bizarre bug on SunOS 4.1.3.
if $ac_need_defaults; then
  test "${CONFIG_FILES+set}" = set || CONFIG_FILES=$config_files
  test "${CONFIG_HEADERS+set}" = set || CONFIG_HEADERS=$config_headers
fi

# Have a temporary directory for convenience.  Make it in the build tree
# simply because there is no reason against having it here, and in addition,
# creating and moving files from /tmp can sometimes cause problems.
# Hook for its removal unless debugging.
# Note that there is a small window in which the directory will not be cleaned:
# after its creation but before its name has been assigned to `$tmp'.
$debug ||
{
  tmp=
  trap 'exit_status=$?
  { test -z "$tmp" || test ! -d "$tmp" || rm -fr "$tmp"; } && exit $exit_status
' 0
  trap '{ (exit 1); exit 1; }' 1 2 13 15
}
# Create a (secure) tmp directory for tmp files.

{
  tmp=`(umask 077 && mktemp -d "./confXXXXXX") 2>/dev/null` &&
  test -n "$tmp" && test -d "$tmp"
}  ||
{
  tmp=./conf$$-$RANDOM
  (umask 077 && mkdir "$tmp")
} ||
{
   echo "$me: cannot create a temporary directory in ." >&2
   { (exit 1); exit 1; }
}

#
# Set up the sed scripts for CONFIG_FILES section.
#

# No need to generate the scripts if there are no CONFIG_FILES.
# This happens for instance when ./config.status config.h
if test -n "$CONFIG_FILES"; then

_ACEOF


ac_delim='%!_!# '
for ac_last_try in false false false false false :; do
  cat >conf$$subs.sed <<_ACEOF
SHELL!$SHELL$ac_delim
PATH_SEPARATOR!$PATH_SEPARATOR$ac_delim
PACKAGE_NAME!$PACKAGE_NAME$ac_delim
PACKAGE_TARNAME!$PACKAGE_TARNAME$ac_delim
PACKAGE_VERSION!$PACKAGE_VERSION$ac_delim
PACKAGE_STRING!$PACKAGE_STRING$ac_delim
PACKAGE_BUGREPORT!$PACKAGE_BUGREPORT$ac_delim
exec_prefix!$exec_prefix$ac_delim
prefix!$prefix$ac_delim
program_transform_name!$program_transform_name$ac_delim
bindir!$bindir$ac_delim
sbindir!$sbindir$ac_delim
libexecdir!$libexecdir$ac_delim
datarootdir!$datarootdir$ac_delim
datadir!$datadir$ac_delim
sysconfdir!$sysconfdir$ac_delim
sharedstatedir!$sharedstatedir$ac_delim
localstatedir!$localstatedir$ac_delim
includedir!$includedir$ac_delim
oldincludedir!$oldincludedir$ac_delim
docdir!$docdir$ac_delim
infodir!$infodir$ac_delim
htmldir!$htmldir$ac_delim
dvidir!$dvidir$ac_delim
pdfdir!$pdfdir$ac_delim
psdir!$psdir$ac_delim
libdir!$libdir$ac_delim
localedir!$localedir$ac_delim
mandir!$mandir$ac_delim
DEFS!$DEFS$ac_delim
ECHO_C!$ECHO_C$ac_delim
ECHO_N!$ECHO_N$ac_delim
ECHO_T!$ECHO_T$ac_delim
LIBS!$LIBS$ac_delim
build_alias!$build_alias$ac_delim
host_alias!$host_alias$ac_delim
target_alias!$target_alias$ac_delim
build!$build$ac_delim
build_cpu!$build_cpu$ac_delim
build_vendor!$build_vendor$ac_delim
build_os!$build_os$ac_delim
host!$host$ac_delim
host_cpu!$host_cpu$ac_delim
host_vendor!$host_vendor$ac_delim
host_os!$host_os$ac_delim
F77!$F77$ac_delim
FFLAGS!$FFLAGS$ac_delim
LDFLAGS!$LDFLAGS$ac_delim
ac_ct_F77!$ac_ct_F77$ac_delim
EXEEXT!$EXEEXT$ac_delim
OBJEXT!$OBJEXT$ac_delim
FLIBS!$FLIBS$ac_delim
FC!$FC$ac_delim
FCFLAGS!$FCFLAGS$ac_delim
ac_ct_FC!$ac_ct_FC$ac_delim
FCLIBS!$FCLIBS$ac_delim
CXX!$CXX$ac_delim
CXXFLAGS!$CXXFLAGS$ac_delim
CPPFLAGS!$CPPFLAGS$ac_delim
ac_ct_CXX!$ac_ct_CXX$ac_delim
CC!$CC$ac_delim
CFLAGS!$CFLAGS$ac_delim
ac_ct_CC!$ac_ct_CC$ac_delim
CPP!$CPP$ac_delim
GREP!$GREP$ac_delim
EGREP!$EGREP$ac_delim
INSTALL_PROGRAM!$INSTALL_PROGRAM$ac_delim
INSTALL_SCRIPT!$INSTALL_SCRIPT$ac_delim
INSTALL_DATA!$INSTALL_DATA$ac_delim
MAKE!$MAKE$ac_delim
AR!$AR$ac_delim
RANLIB!$RANLIB$ac_delim
PROFILING_FLAG!$PROFILING_FLAG$ac_delim
VERSION!$VERSION$ac_delim
ARFLAGS!$ARFLAGS$ac_delim
LINKER!$LINKER$ac_delim
LIBOBJS!$LIBOBJS$ac_delim
LTLIBOBJS!$LTLIBOBJS$ac_delim
_ACEOF

  if test `sed -n "s/.*$ac_delim\$/X/p" conf$$subs.sed | grep -c X` = 78; then
    break
  elif $ac_last_try; then
    { { echo "$as_me:$LINENO: error: could not make $CONFIG_STATUS" >&5
echo "$as_me: error: could not make $CONFIG_STATUS" >&2;}
   { (exit 1); exit 1; }; }
  else
    ac_delim="$ac_delim!$ac_delim _$ac_delim!! "
  fi
done

ac_eof=`sed -n '/^CEOF[0-9]*$/s/CEOF/0/p' conf$$subs.sed`
if test -n "$ac_eof"; then
  ac_eof=`echo "$ac_eof" | sort -nru | sed 1q`
  ac_eof=`expr $ac_eof + 1`
fi

cat >>$CONFIG_STATUS <<_ACEOF
cat >"\$tmp/subs-1.sed" <<\CEOF$ac_eof
/@[a-zA-Z_][a-zA-Z_0-9]*@/!b end
_ACEOF
sed '
s/[,\\&]/\\&/g; s/@/@|#_!!_#|/g
s/^/s,@/; s/!/@,|#_!!_#|/
:n
t n
s/'"$ac_delim"'$/,g/; t
s/$/\\/; p
N; s/^.*\n//; s/[,\\&]/\\&/g; s/@/@|#_!!_#|/g; b n
' >>$CONFIG_STATUS <conf$$subs.sed
rm -f conf$$subs.sed
cat >>$CONFIG_STATUS <<_ACEOF
:end
s/|#_!!_#|//g
CEOF$ac_eof
_ACEOF


# VPATH may cause trouble with some makes, so we remove $(srcdir),
# ${srcdir} and @srcdir@ from VPATH if srcdir is ".", strip leading and
# trailing colons and then remove the whole line if VPATH becomes empty
# (actually we leave an empty line to preserve line numbers).
if test "x$srcdir" = x.; then
  ac_vpsub='/^[	 ]*VPATH[	 ]*=/{
s/:*\$(srcdir):*/:/
s/:*\${srcdir}:*/:/
s/:*@srcdir@:*/:/
s/^\([^=]*=[	 ]*\):*/\1/
s/:*$//
s/^[^=]*=[	 ]*$//
}'
fi

cat >>$CONFIG_STATUS <<\_ACEOF
fi # test -n "$CONFIG_FILES"


for ac_tag in  :F $CONFIG_FILES  :H $CONFIG_HEADERS
do
  case $ac_tag in
  :[FHLC]) ac_mode=$ac_tag; continue;;
  esac
  case $ac_mode$ac_tag in
  :[FHL]*:*);;
  :L* | :C*:*) { { echo "$as_me:$LINENO: error: Invalid tag $ac_tag." >&5
echo "$as_me: error: Invalid tag $ac_tag." >&2;}
   { (exit 1); exit 1; }; };;
  :[FH]-) ac_tag=-:-;;
  :[FH]*) ac_tag=$ac_tag:$ac_tag.in;;
  esac
  ac_save_IFS=$IFS
  IFS=:
  set x $ac_tag
  IFS=$ac_save_IFS
  shift
  ac_file=$1
  shift

  case $ac_mode in
  :L) ac_source=$1;;
  :[FH])
    ac_file_inputs=
    for ac_f
    do
      case $ac_f in
      -) ac_f="$tmp/stdin";;
      *) # Look for the file first in the build tree, then in the source tree
	 # (if the path is not absolute).  The absolute path cannot be DOS-style,
	 # because $ac_f cannot contain `:'.
	 test -f "$ac_f" ||
	   case $ac_f in
	   [\\/$]*) false;;
	   *) test -f "$srcdir/$ac_f" && ac_f="$srcdir/$ac_f";;
	   esac ||
	   { { echo "$as_me:$LINENO: error: cannot find input file: $ac_f" >&5
echo "$as_me: error: cannot find input file: $ac_f" >&2;}
   { (exit 1); exit 1; }; };;
      esac
      ac_file_inputs="$ac_file_inputs $ac_f"
    done

    # Let's still pretend it is `configure' which instantiates (i.e., don't
    # use $as_me), people would be surprised to read:
    #    /* config.h.  Generated by config.status.  */
    configure_input="Generated from "`IFS=:
	  echo $* | sed 's|^[^:]*/||;s|:[^:]*/|, |g'`" by configure."
    if test x"$ac_file" != x-; then
      configure_input="$ac_file.  $configure_input"
      { echo "$as_me:$LINENO: creating $ac_file" >&5
echo "$as_me: creating $ac_file" >&6;}
    fi

    case $ac_tag in
    *:-:* | *:-) cat >"$tmp/stdin";;
    esac
    ;;
  esac

  ac_dir=`$as_dirname -- "$ac_file" ||
$as_expr X"$ac_file" : 'X\(.*[^/]\)//*[^/][^/]*/*$' \| \
	 X"$ac_file" : 'X\(//\)[^/]' \| \
	 X"$ac_file" : 'X\(//\)$' \| \
	 X"$ac_file" : 'X\(/\)' \| . 2>/dev/null ||
echo X"$ac_file" |
    sed '/^X\(.*[^/]\)\/\/*[^/][^/]*\/*$/{
	    s//\1/
	    q
	  }
	  /^X\(\/\/\)[^/].*/{
	    s//\1/
	    q
	  }
	  /^X\(\/\/\)$/{
	    s//\1/
	    q
	  }
	  /^X\(\/\).*/{
	    s//\1/
	    q
	  }
	  s/.*/./; q'`
  { as_dir="$ac_dir"
  case $as_dir in #(
  -*) as_dir=./$as_dir;;
  esac
  test -d "$as_dir" || { $as_mkdir_p && mkdir -p "$as_dir"; } || {
    as_dirs=
    while :; do
      case $as_dir in #(
      *\'*) as_qdir=`echo "$as_dir" | sed "s/'/'\\\\\\\\''/g"`;; #(
      *) as_qdir=$as_dir;;
      esac
      as_dirs="'$as_qdir' $as_dirs"
      as_dir=`$as_dirname -- "$as_dir" ||
$as_expr X"$as_dir" : 'X\(.*[^/]\)//*[^/][^/]*/*$' \| \
	 X"$as_dir" : 'X\(//\)[^/]' \| \
	 X"$as_dir" : 'X\(//\)$' \| \
	 X"$as_dir" : 'X\(/\)' \| . 2>/dev/null ||
echo X"$as_dir" |
    sed '/^X\(.*[^/]\)\/\/*[^/][^/]*\/*$/{
	    s//\1/
	    q
	  }
	  /^X\(\/\/\)[^/].*/{
	    s//\1/
	    q
	  }
	  /^X\(\/\/\)$/{
	    s//\1/
	    q
	  }
	  /^X\(\/\).*/{
	    s//\1/
	    q
	  }
	  s/.*/./; q'`
      test -d "$as_dir" && break
    done
    test -z "$as_dirs" || eval "mkdir $as_dirs"
  } || test -d "$as_dir" || { { echo "$as_me:$LINENO: error: cannot create directory $as_dir" >&5
echo "$as_me: error: cannot create directory $as_dir" >&2;}
   { (exit 1); exit 1; }; }; }
  ac_builddir=.

case "$ac_dir" in
.) ac_dir_suffix= ac_top_builddir_sub=. ac_top_build_prefix= ;;
*)
  ac_dir_suffix=/`echo "$ac_dir" | sed 's,^\.[\\/],,'`
  # A ".." for each directory in $ac_dir_suffix.
  ac_top_builddir_sub=`echo "$ac_dir_suffix" | sed 's,/[^\\/]*,/..,g;s,/,,'`
  case $ac_top_builddir_sub in
  "") ac_top_builddir_sub=. ac_top_build_prefix= ;;
  *)  ac_top_build_prefix=$ac_top_builddir_sub/ ;;
  esac ;;
esac
ac_abs_top_builddir=$ac_pwd
ac_abs_builddir=$ac_pwd$ac_dir_suffix
# for backward compatibility:
ac_top_builddir=$ac_top_build_prefix

case $srcdir in
  .)  # We are building in place.
    ac_srcdir=.
    ac_top_srcdir=$ac_top_builddir_sub
    ac_abs_top_srcdir=$ac_pwd ;;
  [\\/]* | ?:[\\/]* )  # Absolute name.
    ac_srcdir=$srcdir$ac_dir_suffix;
    ac_top_srcdir=$srcdir
    ac_abs_top_srcdir=$srcdir ;;
  *) # Relative name.
    ac_srcdir=$ac_top_build_prefix$srcdir$ac_dir_suffix
    ac_top_srcdir=$ac_top_build_prefix$srcdir
    ac_abs_top_srcdir=$ac_pwd/$srcdir ;;
esac
ac_abs_srcdir=$ac_abs_top_srcdir$ac_dir_suffix


  case $ac_mode in
  :F)
  #
  # CONFIG_FILE
  #

  case $INSTALL in
  [\\/$]* | ?:[\\/]* ) ac_INSTALL=$INSTALL ;;
  *) ac_INSTALL=$ac_top_build_prefix$INSTALL ;;
  esac
_ACEOF

cat >>$CONFIG_STATUS <<\_ACEOF
# If the template does not know about datarootdir, expand it.
# FIXME: This hack should be removed a few years after 2.60.
ac_datarootdir_hack=; ac_datarootdir_seen=

case `sed -n '/datarootdir/ {
  p
  q
}
/@datadir@/p
/@docdir@/p
/@infodir@/p
/@localedir@/p
/@mandir@/p
' $ac_file_inputs` in
*datarootdir*) ac_datarootdir_seen=yes;;
*@datadir@*|*@docdir@*|*@infodir@*|*@localedir@*|*@mandir@*)
  { echo "$as_me:$LINENO: WARNING: $ac_file_inputs seems to ignore the --datarootdir setting" >&5
echo "$as_me: WARNING: $ac_file_inputs seems to ignore the --datarootdir setting" >&2;}
_ACEOF
cat >>$CONFIG_STATUS <<_ACEOF
  ac_datarootdir_hack='
  s&@datadir@&$datadir&g
  s&@docdir@&$docdir&g
  s&@infodir@&$infodir&g
  s&@localedir@&$localedir&g
  s&@mandir@&$mandir&g
    s&\\\${datarootdir}&$datarootdir&g' ;;
esac
_ACEOF

# Neutralize VPATH when `$srcdir' = `.'.
# Shell code in configure.ac might set extrasub.
# FIXME: do we really want to maintain this feature?
cat >>$CONFIG_STATUS <<_ACEOF
  sed "$ac_vpsub
$extrasub
_ACEOF
cat >>$CONFIG_STATUS <<\_ACEOF
:t
/@[a-zA-Z_][a-zA-Z_0-9]*@/!b
s&@configure_input@&$configure_input&;t t
s&@top_builddir@&$ac_top_builddir_sub&;t t
s&@srcdir@&$ac_srcdir&;t t
s&@abs_srcdir@&$ac_abs_srcdir&;t t
s&@top_srcdir@&$ac_top_srcdir&;t t
s&@abs_top_srcdir@&$ac_abs_top_srcdir&;t t
s&@builddir@&$ac_builddir&;t t
s&@abs_builddir@&$ac_abs_builddir&;t t
s&@abs_top_builddir@&$ac_abs_top_builddir&;t t
s&@INSTALL@&$ac_INSTALL&;t t
$ac_datarootdir_hack
" $ac_file_inputs | sed -f "$tmp/subs-1.sed" >$tmp/out

test -z "$ac_datarootdir_hack$ac_datarootdir_seen" &&
  { ac_out=`sed -n '/\${datarootdir}/p' "$tmp/out"`; test -n "$ac_out"; } &&
  { ac_out=`sed -n '/^[	 ]*datarootdir[	 ]*:*=/p' "$tmp/out"`; test -z "$ac_out"; } &&
  { echo "$as_me:$LINENO: WARNING: $ac_file contains a reference to the variable \`datarootdir'
which seems to be undefined.  Please make sure it is defined." >&5
echo "$as_me: WARNING: $ac_file contains a reference to the variable \`datarootdir'
which seems to be undefined.  Please make sure it is defined." >&2;}

  rm -f "$tmp/stdin"
  case $ac_file in
  -) cat "$tmp/out"; rm -f "$tmp/out";;
  *) rm -f "$ac_file"; mv "$tmp/out" $ac_file;;
  esac
 ;;
  :H)
  #
  # CONFIG_HEADER
  #
_ACEOF

# Transform confdefs.h into a sed script `conftest.defines', that
# substitutes the proper values into config.h.in to produce config.h.
rm -f conftest.defines conftest.tail
# First, append a space to every undef/define line, to ease matching.
echo 's/$/ /' >conftest.defines
# Then, protect against being on the right side of a sed subst, or in
# an unquoted here document, in config.status.  If some macros were
# called several times there might be several #defines for the same
# symbol, which is useless.  But do not sort them, since the last
# AC_DEFINE must be honored.
ac_word_re=[_$as_cr_Letters][_$as_cr_alnum]*
# These sed commands are passed to sed as "A NAME B PARAMS C VALUE D", where
# NAME is the cpp macro being defined, VALUE is the value it is being given.
# PARAMS is the parameter list in the macro definition--in most cases, it's
# just an empty string.
ac_dA='s,^\\([	 #]*\\)[^	 ]*\\([	 ]*'
ac_dB='\\)[	 (].*,\\1define\\2'
ac_dC=' '
ac_dD=' ,'

uniq confdefs.h |
  sed -n '
	t rset
	:rset
	s/^[	 ]*#[	 ]*define[	 ][	 ]*//
	t ok
	d
	:ok
	s/[\\&,]/\\&/g
	s/^\('"$ac_word_re"'\)\(([^()]*)\)[	 ]*\(.*\)/ '"$ac_dA"'\1'"$ac_dB"'\2'"${ac_dC}"'\3'"$ac_dD"'/p
	s/^\('"$ac_word_re"'\)[	 ]*\(.*\)/'"$ac_dA"'\1'"$ac_dB$ac_dC"'\2'"$ac_dD"'/p
  ' >>conftest.defines

# Remove the space that was appended to ease matching.
# Then replace #undef with comments.  This is necessary, for
# example, in the case of _POSIX_SOURCE, which is predefined and required
# on some systems where configure will not decide to define it.
# (The regexp can be short, since the line contains either #define or #undef.)
echo 's/ $//
s,^[	 #]*u.*,/* & */,' >>conftest.defines

# Break up conftest.defines:
ac_max_sed_lines=50

# First sed command is:	 sed -f defines.sed $ac_file_inputs >"$tmp/out1"
# Second one is:	 sed -f defines.sed "$tmp/out1" >"$tmp/out2"
# Third one will be:	 sed -f defines.sed "$tmp/out2" >"$tmp/out1"
# et cetera.
ac_in='$ac_file_inputs'
ac_out='"$tmp/out1"'
ac_nxt='"$tmp/out2"'

while :
do
  # Write a here document:
    cat >>$CONFIG_STATUS <<_ACEOF
    # First, check the format of the line:
    cat >"\$tmp/defines.sed" <<\\CEOF
/^[	 ]*#[	 ]*undef[	 ][	 ]*$ac_word_re[	 ]*\$/b def
/^[	 ]*#[	 ]*define[	 ][	 ]*$ac_word_re[(	 ]/b def
b
:def
_ACEOF
  sed ${ac_max_sed_lines}q conftest.defines >>$CONFIG_STATUS
  echo 'CEOF
    sed -f "$tmp/defines.sed"' "$ac_in >$ac_out" >>$CONFIG_STATUS
  ac_in=$ac_out; ac_out=$ac_nxt; ac_nxt=$ac_in
  sed 1,${ac_max_sed_lines}d conftest.defines >conftest.tail
  grep . conftest.tail >/dev/null || break
  rm -f conftest.defines
  mv conftest.tail conftest.defines
done
rm -f conftest.defines conftest.tail

echo "ac_result=$ac_in" >>$CONFIG_STATUS
cat >>$CONFIG_STATUS <<\_ACEOF
  if test x"$ac_file" != x-; then
    echo "/* $configure_input  */" >"$tmp/config.h"
    cat "$ac_result" >>"$tmp/config.h"
    if diff $ac_file "$tmp/config.h" >/dev/null 2>&1; then
      { echo "$as_me:$LINENO: $ac_file is unchanged" >&5
echo "$as_me: $ac_file is unchanged" >&6;}
    else
      rm -f $ac_file
      mv "$tmp/config.h" $ac_file
    fi
  else
    echo "/* $configure_input  */"
    cat "$ac_result"
  fi
  rm -f "$tmp/out12"
 ;;


  esac

done # for ac_tag


{ (exit 0); exit 0; }
_ACEOF
chmod +x $CONFIG_STATUS
ac_clean_files=$ac_clean_files_save


# configure is writing to config.log, and then calls config.status.
# config.status does its own redirection, appending to config.log.
# Unfortunately, on DOS this fails, as config.log is still kept open
# by configure, so config.status won't be able to write to it; its
# output is simply discarded.  So we exec the FD to /dev/null,
# effectively closing config.log, so it can be properly (re)opened and
# appended to by config.status.  When coming back to configure, we
# need to make the FD available again.
if test "$no_create" != yes; then
  ac_cs_success=:
  ac_config_status_args=
  test "$silent" = yes &&
    ac_config_status_args="$ac_config_status_args --quiet"
  exec 5>/dev/null
  $SHELL $CONFIG_STATUS $ac_config_status_args || ac_cs_success=false
  exec 5>>config.log
  # Use ||, not &&, to avoid exiting from the if with $? = 1, which
  # would make configure fail if this is the last instruction.
  $ac_cs_success || { (exit 1); exit 1; }
fi
