# Supplementary material for: Spud 1.0: generalising and automating the user interfaces of scientific computer models
Source: Copernicus journal article supplement (doi:10.5194/gmd-2-33-2009), 2009-03-06
Supplement: Supplementary file 1 [file gmd-2-33-2009-supplement.zip › spud-1.0.7/configure.in]

#    Copyright (C) 2006 Imperial College London and others.
#
#    Please see the AUTHORS file in the main source directory for a full list
#    of copyright holders.
#
#    Prof. C Pain
#    Applied Modelling and Computation Group
#    Department of Earth Science and Engineering
#    Imperial College London
#
#    C.Pain@Imperial.ac.uk
#
#    This library is free software; you can redistribute it and/or
#    modify it under the terms of the GNU Lesser General Public
#    License as published by the Free Software Foundation,
#    version 2.1 of the License.
#
#    This library is distributed in the hope that it will be useful,
#    but WITHOUT ANY WARRANTY; without even the implied warranty of
#    MERCHANTABILITY or FITNESS FOR A PARTICULAR PURPOSE.  See the GNU
#    Lesser General Public License for more details.
#
#    You should have received a copy of the GNU Lesser General Public
#    License along with this library; if not, write to the Free Software
#    Foundation, Inc., 59 Temple Place, Suite 330, Boston, MA  02111-1307
#    USA

dnl Process this file with autoconf to produce a configure script.
AC_INIT(include/spud.h)
AC_CONFIG_HEADERS(include/spud_config.h)

# This is to get around some odd behavious of some fortran compilers
FCFLAGS="$FCFLAGS -I/usr/include"

#
# Name spud
#
AC_ARG_ENABLE(debugging,
[AC_HELP_STRING([--enable-debugging],
[turns on debugging flags])])

# Check system type
AC_CANONICAL_HOST

# Find compilers
AC_MSG_NOTICE([*** Fishing for legacy fortran compiler.])
AC_PROG_F77(ifort ifc efc sunf95 gfortran pgf95 pathf95 g95 f90,,f90,$PATH)
AC_F77_LIBRARY_LDFLAGS
fcompiler=`basename $F77`

AC_MSG_NOTICE([*** Fishing for modern Fortran compiler])
AC_PROG_FC(ifort ifc efc sunf95 gfortran pgf95 pathf95 g95 f90,,f90,$PATH)
AC_FC_LIBRARY_LDFLAGS
fccompiler=`basename $FC`

if test "$fcompiler" = "sunf95" ; then
    MODINC_FLAG="-M"
    FFLAGS="-M../include $FFLAGS"
    FCFLAGS="-M../include $FCFLAGS"
else
    MODINC_FLAG="-I"
fi

if test "$F77" = "$FC" ; then
    smart_fortran="yes"
    AC_MSG_NOTICE([*** Assuming that $FC can process both free and fixed form fortran files.])
else
    AC_MSG_NOTICE([*** Assuming that $FC cannot process both free and fixed form fortran files (silly fortran).])
    smart_fortran="no"
fi

AC_PROG_CXX(icpc icc ecc sunCC pgCC g++ CC)
AC_PROG_CPP
LINKER=$CXX

AC_LONG_64_BITS

# Find fortran libraries required when linking with C++ main.
AC_FC_LIBRARY_LDFLAGS

AC_F77_WRAPPERS

# Check for standard libraries
AC_LANG_PUSH([C])
AC_CHECK_LIB(stdc++,main,,)
AC_CHECK_LIB(m,main,,)
AC_CHECK_LIB(pthread,main,,)

LIBS="$LAPACK_LIBS $BLAS_LIBS $LIBS $FCLIBS $FLIBS"

LINKER=$CXX

AC_ARG_ENABLE(shared,
[AC_HELP_STRING([--enable-shared],
[Compile objects with -fPIC to enable the 'make shared' target.])])

if test "$enable_shared" = "yes" ; then
  PIC_FLAG="-fPIC"
  FCFLAGS="$FCFLAGS $PIC_FLAG"
  CXXFLAGS="$CXXFLAGS $PIC_FLAG"
else
  PIC_FLAG=""
fi

##
## what compiler options work
##
if test "$FC" = "g95"; then
    FCFLAGS="-ffast-math -fno-second-underscore $FCFLAGS"
fi

if test "$FC" = "gfortran"; then
    if test "$enable_debugging" = "yes" ; then
	FCFLAGS="-frecord-marker=4 $FCFLAGS"
    else
	FCFLAGS="-ffast-math -frecord-marker=4 $FCFLAGS"
    fi
    CPPFLAGS="$CPPFLAGS -DUSING_GFORTRAN=1"
fi

AC_LANG_PUSH(Fortran 77)
AC_MSG_CHECKING([how do we get fortran 77 to allow long lines])
old_FLAGS="$FFLAGS"
extended_source_flag=none
AC_TRY_COMPILE([],
  [
       PRINT*, "hello world                                                                                      "],
  [
  AC_MSG_RESULT(no extra flags required)
  extended_source_flag=happy
  ],[])

if test "$extended_source_flag" != happy ; then
if test "$extended_source_flag" = none ; then
  FFLAGS="-extend_source"
  AC_TRY_COMPILE([],
  [
       PRINT*, "hello world                                                                                      "],
  [
  extended_source_flag=$FFLAGS
  AC_MSG_RESULT([$FFLAGS])
  FFLAGS="$old_FLAGS $FFLAGS"
  ],[])
fi
if test "$extended_source_flag" = none ; then
  FFLAGS="-132"
  AC_TRY_COMPILE([],
  [
       PRINT*, "hello world                                                                                      "],
  [
  extended_source_flag=$FFLAGS
  AC_MSG_RESULT([$FFLAGS])
  FFLAGS="$old_FLAGS $FFLAGS"
  ],[])
fi
if test "$extended_source_flag" = none ; then
  FFLAGS="-ffree-line-length-none -ffixed-line-length-none"
  AC_TRY_COMPILE([],
  [
       PRINT*, "hello world                                                                                      "],
  [
  extended_source_flag=$FFLAGS
  AC_MSG_RESULT([$FFLAGS])
  FFLAGS="$old_FLAGS $FFLAGS"
  ],[])
fi
if test "$extended_source_flag" = none ; then
  FFLAGS="-ffixed-line-length-huge -ffree-line-length-huge"
  AC_TRY_COMPILE([],
  [
       PRINT*, "hello world                                                                                      "],
  [
  extended_source_flag=$FFLAGS
  AC_MSG_RESULT([$FFLAGS])
  FFLAGS="$old_FLAGS $FFLAGS"
  ],[])
fi
if test "$extended_source_flag" = none ; then
  FFLAGS="-ffixed-line-length-132 -ffree-line-length-huge"
  AC_TRY_COMPILE([],
  [
       PRINT*, "hello world                                                                                      "],
  [
  extended_source_flag=$FFLAGS
  AC_MSG_RESULT([$FFLAGS])
  FFLAGS="$old_FLAGS $FFLAGS"
  ],[])
fi
if test "$extended_source_flag" = none ; then
  FFLAGS="-ffixed-line-length-132"
  AC_TRY_COMPILE([],
  [
       PRINT*, "hello world                                                                                      "],
  [
  extended_source_flag=$FFLAGS
  AC_MSG_RESULT([$FFLAGS])
  FFLAGS="$old_FLAGS $FFLAGS"
  ],[])
fi
if test "$extended_source_flag" = none ; then
  FFLAGS="-Mextend"
  AC_TRY_COMPILE([],
  [
       PRINT*, "hello world                                                                                      "],
  [
  extended_source_flag=$FFLAGS
  AC_MSG_RESULT([$FFLAGS])
  FFLAGS="$old_FLAGS $FFLAGS"
  ],[])
fi
if test "$extended_source_flag" = none ; then
  FFLAGS="-qfixed=256"
  AC_TRY_COMPILE([],
  [
       PRINT*, "hello world                                                                                      "],
    [
    extended_source_flag=$FFLAGS
    AC_MSG_RESULT([$FFLAGS])
    FFLAGS="$old_FLAGS $FFLAGS"
    ],[])
fi
if test "$extended_source_flag" = none ; then
  FFLAGS="-e"
  AC_TRY_COMPILE([],
  [
       PRINT*, "hello world                                                                                      "],
    [
    extended_source_flag=$FFLAGS
    AC_MSG_RESULT([$FFLAGS])
    FFLAGS="$old_FLAGS $FFLAGS"
    ],[])
fi

if test "$extended_source_flag" = none ; then
  AC_MSG_RESULT([we cannot])
else
  FCFLAGS="$FCFLAGS $extended_source_flag"
fi
fi

AC_LANG_POP([Fortran 77])

AC_PROG_INSTALL
AC_CHECK_PROG(MAKE, gmake, gmake, make, $PATH)

# Set default for ARFLAGS, since autoconf does not have a macro for
# it. This allows people to set it when running configure or make.
AC_CHECK_PROG(AR, ar, ar, ,$PATH)
test -n "$ARFLAGS" || ARFLAGS="cr"
AC_PROG_RANLIB

AC_ARG_ENABLE(verbose,
[AC_HELP_STRING([--enable-verbose],
[turns on super verbosity])])

if test "$enable_verbose" = "yes" ; then
   CPPFLAGS="$CPPFLAGS -DVERBOSE_MESSAGES=1"
fi

if test "$enable_debugging" = "yes" ; then
  CXXFLAGS="-g -O0 `echo $CXXFLAGS | sed 's/-O2//g'`"
  FCFLAGS="-g -O0 `echo $FCFLAGS | sed 's/-O2//g'`"

  if test "$fcompiler" = "ifort" ; then
    FCFLAGS="-C -traceback -check nooutput_conversion -check noarg_temp_created  ${FCFLAGS}"
    CXXFLAGS="-fno-omit-frame-pointer ${CXXFLAGS}"
  elif test "$fcompiler" = "gfortran" ; then
    FCFLAGS="-fbounds-check -Wall ${FCFLAGS}"
    CXXFLAGS="-fbounds-check -Wall ${CXXFLAGS}"
    LDFLAGS="-rdynamic ${LDFLAGS}"
  elif test "$fcompiler" = "g95" ; then
    FCFLAGS="-fbounds-check -ftrace=full ${FCFLAGS}"
  elif test "$fcompiler" = "sunf95" ; then
    FCFLAGS="-C -ftrap=invalid -fpover ${FCFLAGS}"
    CXXFLAGS="-ftrap=invalid ${CXXFLAGS}"
  else
    FCFLAGS="-C ${FCFLAGS}"
  fi

else
    AC_MSG_NOTICE([Setting optimisation flags])
    CPPFLAGS="$CPPFLAGS -DNDEBUG=1"
    FCFLAGS="-O3 `echo $FCFLAGS | sed 's/-g -O2//g'`"
    CXXFLAGS="-O3 `echo $CXXFLAGS | sed 's/-g -O2//g'`"
fi

if test "$FC" = "ifc" ; then
  FCFLAGS="-implicitnone -w95 $FCFLAGS"
fi

#####
#
LIBS="$LIBS -L./lib"

##############################################################
# enable gprof profiling

AC_ARG_ENABLE(profiling,
[AC_HELP_STRING([--enable-profiling],
[enable gprof profiling])])

if test "$enable_profiling" = "yes" ; then
  PROFILING_FLAG="-pg"
  CPPFLAGS="-pg $CPPFLAGS"
  FCFLAGS="-pg $FCFLAGS"

  LINKER="$LINKER -pg"
else
  PROFILING_FLAG=""
fi
AC_SUBST(PROFILING_FLAG)

VERSION=`svnversion .`
AC_SUBST(VERSION)
AC_SUBST(ARFLAGS)
AC_SUBST(LINKER)
AC_SUBST(MAKE)

AC_OUTPUT(Makefile bin/spud-preprocess diamond/diamond/preprocess.py src/tests/Makefile diamond/setup.py examples/Makefile)
