# Supplementary material for: Spud 1.0: generalising and automating the user interfaces of scientific computer models
Source: Copernicus journal article supplement (doi:10.5194/gmd-2-33-2009), 2009-03-06
Supplement: Supplementary file 1 [file gmd-2-33-2009-supplement.zip › spud-1.0.7/debian/control]

Source: spud
Maintainer: The ICOM team <patrick.farrell@imperial.ac.uk>
Uploaders: David Ham <david.ham@imperial.ac.uk>
Section: science
Priority: extra
Build-Depends: gfortran (>=4.2), g++ (>=4.2), python-setuptools (>= 0.6b3-1), python-all-dev (>= 2.3.5-11), debhelper (>= 5.0.38), python-central (>= 0.5.6), texlive
Standards-Version: 3.8.0
XS-Python-Version: >= 2.5

Package: diamond
Architecture: all
Depends: python-gtk2, python-lxml, libxml2-utils, python, spudtools
Recommends: python-psyco
Suggests: 
Conflicts: python-diamond
Replaces: python-diamond
Provides: ${python:Provides}
XB-Python-Version: ${python:Versions}
Description: A schema-driven interface for writing XML documents
 Diamond is a dynamic schema-driven graphical user interface for writing
 XML documents. The interface is automatically generated from a schema
 written in RELAX NG describing an XML language. The interface is optimised
 for configuring models for solving problems in computational mechanics,
 though the technology is generic to any sort of XML document creation.

Package: libspud-dev
Architecture: any
Depends: ${shlibs:Depends}, spudtools
Recommends: diamond
Section: libdevel
Suggests:
Description: An automatic options system for scientific models.
 Spud is an automatic options system which reads an xml options file 
 into a dictionary for immediate access from within the model. The xml 
 file is generated using a spud-compatible RELAX NG schema and a
 schema-aware editor such as Diamond.

Package: spudtools
Architecture: all
Depends: ${shlibs:Depends}, trang-amcg
Recommends: diamond
Conflicts: libspud-dev (<1.0.6)
Replaces: libspud-dev (<1.0.6)
Section: science
Suggests:
Description: An automatic options system for scientific models.
 Spud is an automatic options system which reads an xml options file 
 into a dictionary for immediate access from within the model. The xml 
 file is generated using a spud-compatible RELAX NG schema and a
 schema-aware editor such as Diamond. Spudtools contains the schema
 for the spud base language and the spud-preprocess script for
 converting schemas between the compact and xml syntaxes.
