# Supplementary material for: Spud 1.0: generalising and automating the user interfaces of scientific computer models
Source: Copernicus journal article supplement (doi:10.5194/gmd-2-33-2009), 2009-03-06
Supplement: Supplementary file 1 [file gmd-2-33-2009-supplement.zip › spud-1.0.7/debian/diamond.docs]

AUTHORS
