# Supplementary material for: Spud 1.0: generalising and automating the user interfaces of scientific computer models
Source: Copernicus journal article supplement (doi:10.5194/gmd-2-33-2009), 2009-03-06
Supplement: Supplementary file 1 [file gmd-2-33-2009-supplement.zip › spud-1.0.7/debian/libspud-dev.copyright]

Except as noted below, Spud is copyright (C) 2007 Imperial College
London and others. For a full list of contributors see the AUTHORS
file.

Spud is free software; you can redistribute it and/or
modify it under the terms of the GNU Lesser General Public
License as published by the Free Software Foundation; either
version 2.1 of the License, or (at your option) any later version.

This library is distributed in the hope that it will be useful,
but WITHOUT ANY WARRANTY; without even the implied warranty of
MERCHANTABILITY or FITNESS FOR A PARTICULAR PURPOSE.  See the GNU
Lesser General Public License for more details.

On Debian systems, the complete text of the GNU Lesser General Public
License can be found in the file `/usr/share/common-licenses/LGPL-2.1'.

-----

Tinyxml is copyright (c) 2000-2006 Lee Thomason (www.grinninglizard.com)

This software is provided 'as-is', without any express or implied
warranty. In no event will the authors be held liable for any
damages arising from the use of this software.

Permission is granted to anyone to use this software for any
purpose, including commercial applications, and to alter it and
redistribute it freely, subject to the following restrictions:

1. The origin of this software must not be misrepresented; you must
not claim that you wrote the original software. If you use this
software in a product, an acknowledgment in the product documentation
would be appreciated but is not required.

2. Altered source versions must be plainly marked as such, and
must not be misrepresented as being the original software.

3. This notice may not be removed or altered from any source
distribution.
