# Supplementary material for: Spud 1.0: generalising and automating the user interfaces of scientific computer models
Source: Copernicus journal article supplement (doi:10.5194/gmd-2-33-2009), 2009-03-06
Supplement: Supplementary file 1 [file gmd-2-33-2009-supplement.zip › spud-1.0.7/diamond/bin/diamond]

#!/usr/bin/env python

#    This file is part of Diamond.
#
#    Diamond is free software: you can redistribute it and/or modify
#    it under the terms of the GNU General Public License as published by
#    the Free Software Foundation, either version 3 of the License, or
#    (at your option) any later version.
#
#    Diamond is distributed in the hope that it will be useful,
#    but WITHOUT ANY WARRANTY; without even the implied warranty of
#    MERCHANTABILITY or FITNESS FOR A PARTICULAR PURPOSE.  See the
#    GNU General Public License for more details.
#
#    You should have received a copy of the GNU General Public License
#    along with Diamond.  If not, see <http://www.gnu.org/licenses/>.

import getopt
import os
import os.path
import sys
import traceback

import gtk
import gtk.gdk
import gobject

# do this right at the start, so we can find the diamond modules
diamond_path = os.path.join( os.path.dirname(__file__), os.pardir )
sys.path.insert(0, diamond_path)

import diamond.debug as debug

def Help():
  """
  Prints usage information to standard output.
  """

  debug.dprint("Usage: diamond [OPTIONS] ... [FILE]\n" + \
               "\n" + \
               "A Relax NG aware XML editor. [FILE] is the XML file to be opened (a new file is\n" + \
               "created if this is not supplied).\n" + \
               "\n" + \
               "Options:\n" + \
               "\n" + \
               "-h               Display this message\n" + \
               "-s [SCHEMAFILE]  Use the supplied schema file\n" + \
               "-t [TRONFILE]    Use the supplied schematron file for extended validation\n" + \
               "-v               Verbosity switch - if supplied Diamond prints additional\n" + \
               "                 debugging information to standard output and standard error", 0)

  return

def main():

  # Detach from controlling terminal
  try:
    pid = os.fork()
    if pid == 0:
      os.setsid()
      pid = os.fork()
      if pid != 0:
        os._exit(0)
    else:
      os._exit(0)
  except:
    pass

  try:
    opts, args = getopt.getopt(sys.argv[1:], "hvs:t:")
  except:
    Help()
    sys.exit(1)

  if len(args) > 1:
    Help()
    sys.exit(1)

  if not ("-v", "") in opts:
    debug.SetDebugLevel(0)
  if ("-h", "") in opts:
    Help()
    return

  import diamond.config as config
  import diamond.dialogs as dialogs
  import diamond.interface as interface
  import diamond.schema as schema
  import diamond.tree as tree
  import diamond.plugins as plugins

  try:
    input_filename = args[0]
  except IndexError:
    input_filename = None

  logofile = None
  for possible_logofile in [os.path.join(diamond_path, "gui", "diamond.svg"), "/usr/share/diamond/gui/diamond.svg"]:
    try:
      os.stat(possible_logofile)
      logofile = possible_logofile
      break
    except OSError:
      pass


  # Let's find a schema.

  suffix = "xml"

  # if the user specifies a schema on the command line, use that.

  input_schemafile = None
  input_schematron_file = None
  for opt in opts:
    if opt[0] == "-s":
      input_schemafile = opt[1]
    elif opt[0] == "-t":
      input_schematron_file = opt[1]

  # if the user has specified a file to work on, use the suffix as a key

  if input_filename is not None and input_schemafile is None:
    suffix = input_filename.split(".")[-1]
    try:
      input_schemafile = config.schemata[suffix][1]
    except:
      debug.deprint("Could not find schema matching suffix %s." % suffix, 0)
      debug.deprint("Have you registered it in /etc/diamond/schemata/ or $HOME/.diamond/schemata?", 0)
      sys.exit(1)

  # if there is only one schema, use that

  if input_schemafile is None:
    if len(config.schemata) == 1:
      suffix = config.schemata.keys()[0]
      input_schemafile = config.schemata[suffix][1]

  # otherwise ask the user to choose

  if input_schemafile is None:
    choices = [key + ": " + config.schemata[key][0] for key in config.schemata]
    choice = dialogs.radio_dialog("Choose a schema", "Choose a schema to use:", choices, logofile)
    suffix = choice.split(":")[0]
    input_schemafile = config.schemata[suffix][1]

  # ensure that the specified schema actually exists!

  try:
    os.stat(input_schemafile)
  except OSError:
    debug.deprint("Could not find schemafile %s!" % input_schemafile, 0)
    sys.exit(1)

  if input_schematron_file is not None:
    # ensure that the specified schematron file actually exists!
    try:
      os.stat(input_schematron_file)
    except OSError:
      debug.deprint("Could not find Schematron file %s!" % input_schematron_file, 0)
      sys.exit(1)

  if input_filename is not None:
    try:
      os.stat(input_filename)
    except OSError:
       pass

  # Import the GUI Glade file.

  gladefile = None
  for possible_gladefile in [os.path.join(diamond_path, "gui", "gui.glade"), "/usr/share/diamond/gui/gui.glade"]:
    try:
      os.stat(possible_gladefile)
      gladefile = possible_gladefile
      break
    except OSError:
      pass
  if gladefile is None:
    debug.deprint("Cannot locate GUI!", 0)
    sys.exit(1)

  # If input_schemafile doesn't exist, use the fluidity_options schema.
  if input_schemafile == None:
    for possible_schemafile in [os.path.join(diamond_path, "fluidity_options.rng"), "/usr/share/diamond/schema/fluidity_options.rng"]:
      try:
        os.stat(possible_schemafile)
        input_schemafile = possible_schemafile
        break
      except OSError:
        pass

  debug.dprint("\n" + \
               "Glade file:  " + str(gladefile) + "\n" + \
               "Schema file: " + str(input_schemafile) + "\n" + \
               "Logo file:   " + str(logofile) + "\n" + \
               "Input file:  " + str(input_filename) + "\n")

  plugins.configure_plugins(suffix)

  i = interface.Diamond(gladefile = gladefile, logofile = logofile, suffix = suffix)

  def initialise(i, s, f):
    i.open_file(schemafile = s)
    if not f is None:
      try:
        os.stat(f)
        i.open_file(filename = f)
      except:
        i.set_saved(False, f)
    i.main_window.window.set_cursor(None)
    i.statusbar.clear_statusbar()

  i.statusbar.set_statusbar("Loading ...")
  i.main_window.window.set_cursor(gtk.gdk.Cursor(gtk.gdk.WATCH))
  gobject.idle_add(initialise, i, input_schemafile, input_filename)
  while gtk.events_pending():
    gtk.main_iteration()

  gtk.gdk.threads_init()
  gtk.main()

  return

if __name__ == "__main__":
#  import hotshot
#  prof = hotshot.Profile("hotshot_stats.prof")
#  prof.runcall(main)
#  prof.close()
  main()
