# Supplementary material for: Spud 1.0: generalising and automating the user interfaces of scientific computer models
Source: Copernicus journal article supplement (doi:10.5194/gmd-2-33-2009), 2009-03-06
Supplement: Supplementary file 1 [file gmd-2-33-2009-supplement.zip › spud-1.0.7/diamond/diamond/choice.py]

#!/usr/bin/env python

#    This file is part of Diamond.
#
#    Diamond is free software: you can redistribute it and/or modify
#    it under the terms of the GNU General Public License as published by
#    the Free Software Foundation, either version 3 of the License, or
#    (at your option) any later version.
#
#    Diamond is distributed in the hope that it will be useful,
#    but WITHOUT ANY WARRANTY; without even the implied warranty of
#    MERCHANTABILITY or FITNESS FOR A PARTICULAR PURPOSE.  See the
#    GNU General Public License for more details.
#
#    You should have received a copy of the GNU General Public License
#    along with Diamond.  If not, see <http://www.gnu.org/licenses/>.

import base64
import bz2
import copy
import StringIO
from lxml import etree

import tree

class Choice:
  def __init__(self, l, cardinality=''):
    self.l = l
    if l == []:
      raise Exception
    self.index = 0
    name = ""
    for choice in l:
      assert choice.__class__ is tree.Tree
      name = name + choice.name + ":"
    name = name[:-1]
    self.name = name
    self.schemaname = name
    self.cardinality = cardinality
    self.parent = None
    self.set_default_active()

  def set_default_active(self):
    self.active = True
    if self.cardinality == '?' or self.cardinality == '*':
      self.active = False

  def choose(self, i):
    self.index = i

  def find_tree(self, name):
    for t in self.l:
      if t.name == name:
        return t

    debug.deprint("self.name == %s" % self.name, 0)
    for choice in self.l:
      debug.deprint("choice.name == %s" % choice.name, 0)
    raise Exception, "No such choice name: %s" % name

  def set_active_choice_by_name(self, name):
    matched = False
    for t in self.l:
      if t.name == name[0:len(t.name)]:
        matched = True
        self.index = self.l.index(t)

    if not matched:
      raise Exception, "no such name %s found" % name

    self.recompute_validity()

  def set_active_choice_by_ref(self, ref):
    self.index = self.l.index(ref)
    self.recompute_validity()

  def get_current_tree(self):
    return self.l[self.index]

  def add_children(self, schema):
    return self.get_current_tree().add_children(schema)

  def pickle(self):
    return base64.b64encode(bz2.compress(pickle.dumps(self)))

  def recompute_validity(self):
    self.get_current_tree().recompute_validity()

  def copy(self):
    new_choices = []
    for choice in self.l:
      new_choices.append(choice.copy())

    new_choice = Choice(new_choices)
    for attr in ["index", "name", "schemaname", "cardinality", "active"]:
      setattr(new_choice, attr, copy.copy(getattr(self, attr)))

    new_choice.set_parent(self.parent)
    for choice in new_choice.l:
      choice.children = copy.copy([])

    return new_choice

  def get_possible_names(self):
    return [x.name for x in self.l]

  def set_parent(self, parent):
    self.parent = parent
    for choice in self.l:
      choice.parent = parent

  def write_core(self, parent):
    l = self.l
    for i in range(len(l)):
      if self.index == i:
        l[i].write_core(parent)
#      else:
#        root=etree.Element(parent.tag)
#        l[i].write_core(root)
#        comment_buffer = StringIO.StringIO(etree.tostring(root))
#        comment_text = ("DIAMOND MAGIC COMMENT (neglected choice subtree %s):\n" % l[i].schemaname)
#        comment_text = comment_text + base64.b64encode(bz2.compress(comment_buffer.getvalue()))
#        parent.append(etree.Comment(unicode(comment_text)))

    return parent

  def choices(self):
    return self.l
