# Supplementary material for: Spud 1.0: generalising and automating the user interfaces of scientific computer models
Source: Copernicus journal article supplement (doi:10.5194/gmd-2-33-2009), 2009-03-06
Supplement: Supplementary file 1 [file gmd-2-33-2009-supplement.zip › spud-1.0.7/diamond/diamond/schema.py]

#!/usr/bin/env python

#    This file is part of Diamond.
#
#    Diamond is free software: you can redistribute it and/or modify
#    it under the terms of the GNU General Public License as published by
#    the Free Software Foundation, either version 3 of the License, or
#    (at your option) any later version.
#
#    Diamond is distributed in the hope that it will be useful,
#    but WITHOUT ANY WARRANTY; without even the implied warranty of
#    MERCHANTABILITY or FITNESS FOR A PARTICULAR PURPOSE.  See the
#    GNU General Public License for more details.
#
#    You should have received a copy of the GNU General Public License
#    along with Diamond.  If not, see <http://www.gnu.org/licenses/>.

import base64
import bz2
import copy
import sys

import cStringIO

from lxml import etree

import debug
import choice
import plist
import preprocess
import tree

###############################
#     LIBRARY FUNCTIONS       #
###############################

# find_hidden_xmldata looks for DIAMOND MAGIC COMMENT children in the given xmlnode, decompresses them, and adds
# them to the tree.
def find_hidden_xmldata(datatree, xmlnode):
  hidden = []
  for xmlchild in xmlnode.iterchildren(tag=etree.Comment):
    text = xmlchild.text
    data = text.split('\n')
    name = data[0]

    # A DIAMOND MAGIC comment should contain those words on the first line of the comment.
    if datatree.schemaname in name and "DIAMOND MAGIC COMMENT" in name:
      pickle = data[1]
      uncompressed = bz2.decompress(base64.b64decode(pickle))
      try:
        doc = etree.fromstring(uncompressed)
      except:
        print "Error reading compressed XML. Output follows:"
        print "\"", bz2.decompress(base64.b64decode(pickle)), "\""
        sys.exit(1)

      # Comments generated using the 4suite API, which included an XML declaration,
      # are incompatable with the new format. Notify the user.
      if uncompressed.find("<?xml version=") != -1:
         print "Using old-style magic comments. Ignoring."
         return []

      # Iterate over all elements in this newly-decompressed subtree, and add them to the
      # in-memory tree structure.
      for child in doc.iterchildren(tag=etree.Element):
        new_xmldata = child
        hidden.append(new_xmldata)
        break

  return hidden

##########################
#     SCHEMA CLASS       #
##########################

class Schema(object):
  def __init__(self, schemafile):
    p = etree.XMLParser(remove_comments=True)
    self.tree = etree.parse(cStringIO.StringIO(preprocess.preprocess(schemafile)), p)

    self.callbacks = {'element': self.cb_element,
                      'documentation': self.cb_documentation,
                      'value': self.cb_value,
                      'attribute': self.cb_attribute,
                      'data': self.cb_data,
                      'optional': self.cb_optional,
                      'zeroOrMore': self.cb_zeroormore,
                      'oneOrMore': self.cb_oneormore,
                      'choice': self.cb_choice,
                      'empty': self.cb_empty,
                      'list': self.cb_list,
                      'group': self.cb_group,
                      'interleave': self.cb_group,
                      'name': self.cb_name,
                      'text': self.cb_text,
		      'anyName' : self.cb_anyname,
		      'nsName' : self.cb_nsname,
		      'except' : self.cb_except,
                      'ignore' : self.cb_ignore,
                      'notAllowed' : self.cb_notallowed}
                      
    self.lost_eles = ""
  
    return

  def element_children(self, element):
    """
    Return a list of the children of the supplied element, following references
    as required.
    """

    children = []
    for child1 in element.iterchildren(tag=etree.Element):
      if self.tag(child1) == "ref":
        if not "name" in child1.keys():
          debug.deprint("Warning: Encountered reference with no name")
          continue

        name = child1.get("name")

        xpath = self.tree.xpath('/t:grammar/t:define[@name="' + name + '"]',
               namespaces={'t': 'http://relaxng.org/ns/structure/1.0'})

        if len(xpath) == 0:
          debug.deprint("Warning: Schema reference %s not found" % name)
          continue

        for child2 in self.element_children(xpath[0]):
          children.append(child2)
      else:
        children.append(child1)

    return children
    
  def choice_children(self, children):
    """
    Collapse all choices within a choice into a single list of (non-choice) children
    """
  
    out_children = []
    for child in children:
      if self.tag(child) == "choice":
        out_children = out_children + self.choice_children(self.element_children(child))
      else:
        out_children.append(child)
        
    return out_children

  def valid_children(self, eid):
    if isinstance(eid, tree.Tree):
      eid = eid.schemaname

    if eid == ":start":
      try:
        node = self.tree.xpath('/t:grammar/t:start', namespaces={'t': 'http://relaxng.org/ns/structure/1.0'})[0]
      except:
        debug.deprint("No valid start node found. Are you using a library Relax-NG file like spud_base.rng?", 0)
        sys.exit(0)
    else:
      xpath = self.tree.xpath(eid)
      if len(xpath) == 0:
        debug.deprint("Warning: no element with XPath %s" % eid)
        return []
      node = xpath[0]

    results = []

    for child in self.element_children(node):
      self.append(results, self.to_tree(child))

    if eid == ":start" and len(results) != 1:
      debug.deprint("Error: there must be exactly one root element in an XML document, but found:", 0)
      for result in results:
        debug.deprint("  %s" % result.name, 0)
      sys.exit(1)
      
    return results

  def to_tree(self, element):
    tag = self.tag(element)
    f = self.callbacks[tag]
    facts = {}
    x = f(element, facts)
    return x

  #############################################
  # Beginning of schema processing functions. #
  #############################################

  def cb_name(self, element, facts):
    name = element.text
    facts["name"] = name

  def cb_element(self, element, facts):
    newfacts = {}
    if "cardinality" in facts:
      newfacts["cardinality"] = facts["cardinality"]

    if "name" in element.keys():
      newfacts["name"] = element.get("name")
    else:
      debug.deprint("Warning: Encountered element with no name")

    newfacts['schemaname'] = self.tree.getpath(element)

    for child in self.element_children(element):
      tag = self.tag(child)

      if tag not in ['element', 'optional', 'zeroOrMore', 'oneOrMore', 'ignore']:
        f = self.callbacks[tag]
        x = f(child, newfacts)

    try:
      d = newfacts["datatype"]
      if isinstance(d, tuple):
        new_d = []

        for x in d:
          if x is not None:
            new_d.append(x)

        d = tuple(new_d)
        newfacts["datatype"] = d
        if len(d) == 0:
          newfacts["datatype"] = None
        elif len(d) == 1 and isinstance(d[0], plist.List):
          newfacts["datatype"] = d[0]
        else:
          l_values = []
          l_data   = []
          for x in d:
            if isinstance(x, str):
              l_values.append(x)
            else:
              l_data.append(x)

          if len(l_data) > 1:
            if "name" in element.keys():
              debug.deprint("Warning: Element %s has multiple datatypes - using first one" % newfacts["name"])
            else:
              debug.deprint("Warning: Unnamed element has multiple datatypes - using first one")

          if len(l_data) > 0:
            if len(l_values) == 0:
              newfacts["datatype"] = l_data[0]
            else:
              newfacts["datatype"] = tuple([tuple(l_values)] + l_data[0])
    except KeyError:
      pass

    return tree.Tree(**newfacts)

  def cb_documentation(self, element, facts):
    facts['doc'] = element.text

  def cb_value(self, element, facts):
    if "datatype" in facts:
      l = list(facts["datatype"])
    else:
      l = []

    l.append(element.text)
    facts["datatype"] = tuple(l)

  def cb_attribute(self, element, facts):
    if not "name" in element.keys():
      debug.deprint("Warning: Encountered attribute with no name")
      return

    newfacts = {}
    name = element.get("name")

    for child in self.element_children(element):
      tag = self.tag(child)
      f = self.callbacks[tag]
      x = f(child, newfacts)

    if "attrs" not in facts:
      facts["attrs"] = {}

    try:
      datatype = newfacts["datatype"]
    except:
      debug.deprint("Warning: Encountered attribute with no datatype")
      return
    curval = None

    if isinstance(datatype, tuple):
      new_datatype = []
      for x in datatype:
        if not x is None:
          new_datatype.append(x)
      datatype = new_datatype
      if len(datatype) == 0:
        datatype = None
      elif len(datatype) == 1:
        datatype = datatype[0]
        if isinstance(datatype, str):
          curval = datatype
          datatype = 'fixed'
        else:
          curval = None
      else:
        l_values = []
        l_data   = []
        for x in datatype:
          if isinstance(x, str):
            l_values.append(x)
          else:
            l_data.append(x)

        if len(l_data) > 0:
          debug.deprint("Warning: Attribute %s has multiple datatypes - using first one" % name)
          if len(l_values) == 0:
            datatype = l_data[0]
          else:
            datatype = tuple([tuple(l_values)] + l_data[0])
        else:
          datatype = tuple(l_values)

    facts["attrs"][name] = (datatype, curval)

  def cb_data(self, element, facts):
    if "datatype" in facts:
      if isinstance(facts["datatype"], tuple):
        l = list(facts["datatype"])
      else:
        l = [facts["datatype"]]
    else:
      l = []

    mapping = {'integer': int,
               'float': float,
               'double': float,
               'string': str,
               'ID' : str,
               'anyURI' : str,
               'IDREF' : int,
               'NMTOKEN' : str}

    datatype_name = element.get("type")
    l.append(mapping[datatype_name])
    if len(l) == 1:
      facts["datatype"] = l[0]
    else:
      facts["datatype"] = tuple(l)

  def cb_optional(self, element, facts):
    facts["cardinality"] = '?'
    r = []
    for child in self.element_children(element):
      tag = self.tag(child)
      f = self.callbacks[tag]
      self.append(r, f(child, facts))

    return r

  def cb_zeroormore(self, element, facts):
    facts["cardinality"] = '*'
    r = []
    for child in self.element_children(element):
      tag = self.tag(child)
      f = self.callbacks[tag]
      self.append(r, f(child, facts))

    return r

  def cb_oneormore(self, element, facts):
    facts["cardinality"] = '+'
    r = []
    for child in self.element_children(element):
      tag = self.tag(child)
      f = self.callbacks[tag]
      self.append(r, f(child, facts))

    return r

  def cb_choice(self, element, facts):
    # there are really two cases here.
    # choice between values of elements,
    # and choice between elements

    tagnames = [self.tag(child) for child in element]

    if "value" in tagnames:
      for child in self.element_children(element):
        tag = self.tag(child)
        f = self.callbacks[tag]
        x = f(child, facts)

    else:
      if "schemaname" in facts:
        return

      r = []
      children = self.choice_children(self.element_children(element))
      
      # bloody simplified RNG
      if len(children) == 2:
        empty = [x for x in children if self.tag(x) == "empty"]
        nonempty = [x for x in children if self.tag(x) != "empty"]
        if len(empty) > 0:
          tag = self.tag(nonempty[0])
          if tag == "oneOrMore":
            return self.cb_oneormore(element, facts)
          else:
            f = self.callbacks[tag]
            return f(element, facts)

      for child in children:
        newfacts = {}
        tag = self.tag(child)
        f = self.callbacks[tag]
        self.append(r, f(child, newfacts))

      return choice.Choice(r, **facts)

  def cb_empty(self, element, facts):
    pass

  def cb_list(self, element, facts):
    newfacts = {}
    for child in self.element_children(element):
      tag = self.tag(child)
      f = self.callbacks[tag]
      f(child, newfacts)

    d = newfacts["datatype"]
    try:
      c = newfacts["cardinality"]
    except KeyError:
      c = ''
      if isinstance(d, tuple):
        c = str(len(d))
        d = d[0]

    l = plist.List(d, c)
    if "datatype" in facts:
      e = list(facts["datatype"])
    else:
      e = []

    e.append(l)
    facts["datatype"] = tuple(e)

  def cb_group(self, element, facts):
    results = []
    for child in self.element_children(element):
      newfacts = {}
      tag = self.tag(child)
      f = self.callbacks[tag]
      self.append(results, f(child, newfacts))

    return results

  def cb_text(self, element, facts):
    if "datatype" in facts:
      if isinstance(facts["datatype"], tuple):
        l = list(facts["datatype"])
      else:
        l = [facts["datatype"]]
    else:
      l = []

    l.append(str)
    if len(l) == 1:
      facts["datatype"] = l[0]
    else:
      facts["datatype"] = tuple(l)

  def cb_anyname(self, element, facts):
    debug.deprint("anyName element found. Yet to handle.", 0)
#    sys.exit(1)

  def cb_nsname(self, element, facts):
    debug.deprint("nsName element found. Yet to handle.", 0)
#    sys.exit(1)

  def cb_except(self, element, facts):
    debug.deprint("except element found. Yet to handle.", 0)
#    sys.exit(1)

  def cb_ignore(self, element, facts):
    pass

  def cb_notallowed(self, element, facts):
    debug.dprint("notallowed element found. Yet to handle.", 0)

  #######################################
  # End of schema processing functions. #
  #######################################

  def tag(self, element):
    # Ignore non-RelaxNG elements. Is this the best way to handle it? 
    namespace = element.tag.split('}')[0]
    if namespace.find("relaxng") != -1:
      return element.tag.split('}')[-1]
    else:
      return "ignore"

  # append - append either a list or single element 'x' to 'r'.
  def append(self, r, x):
    if x is None:
      return

    if isinstance(x, list):
      for y in x:
        r.append(y)
      return

    r.append(x)

  ##########################################
  # Beginning of XML processing functions. #
  ##########################################

  # read takes a file handle, constructs a generic in-memory representation using the
  # the etree API, and then converts it to a tree of Tree and Choice elements.
  def read(self, xmlfile):
    doc = etree.parse(xmlfile)

    self.lost_eles = ""

    datatree = self.valid_children(":start")[0]
    xmlnode  = doc.getroot()
    self.xml_read_merge(datatree, xmlnode)
    self.xml_read_core(datatree, xmlnode, doc)

    if self.lost_eles != "":
      debug.deprint("WARNING: lost XML elements:\n" + self.lost_eles)
      
    return datatree, self.lost_eles

  def xml_read_merge(self, datatree, xmlnode):
    # The datatree has the following set:
    # name, schemaname, doc, cardinality, datatype, parent,
    # attribute datatypes.
    # the xmlnode contains the following information:
    # attribute values, data
    # merge the two.
    
    datatree.xmlnode = xmlnode
    xmlkeys = xmlnode.keys()

    if datatree.__class__ is tree.Tree:
      to_set = datatree
    elif datatree.__class__ is choice.Choice:
      if "name" in xmlkeys:
        xmlname = xmlnode.get("name")
        have_found = False

        possibles = [tree_choice for tree_choice in datatree.choices() if tree_choice.name == xmlnode.tag]
        # first loop over the fixed-value names
        for tree_choice in possibles:
          if "name" not in tree_choice.attrs:
            continue

          datatype = tree_choice.attrs["name"][0]
          if datatype == 'fixed':
            treename = tree_choice.attrs["name"][1]
            if treename == xmlname:
              have_found = True
              datatree.set_active_choice_by_ref(tree_choice)
              break

        # if we haven't found it, look for a generic name
        if have_found is False:
          for tree_choice in possibles:
            if "name" not in tree_choice.attrs:
              continue

            datatype = tree_choice.attrs["name"][0]
            if datatype != 'fixed':
              have_found = True
              datatree.set_active_choice_by_ref(tree_choice)
              break

      else:
        datatree.set_active_choice_by_name(xmlnode.tag)

      to_set = datatree.get_current_tree()

    # attribute values.
    for key in to_set.attrs.keys():
      if key in xmlkeys:
        try:
          to_set.set_attr(key, xmlnode.get(key))
        except:
          pass

    # Get the text value (the node's data)
    if xmlnode.text is not None:
     try:
       text=xmlnode.text.strip()
       if text != "":
         to_set.set_data(text)
     except:
       pass
      

    # data.
    for child in xmlnode.iterchildren(tag=etree.Element):
      if child.tail is not None:
         try:
           text = child.tail.strip()
           if text != "":
             to_set.set_data(text)
             break
         except:
           pass

    to_set.recompute_validity()
    datatree.recompute_validity()

  ###########################################################################################
  # construct the priority queue
  # we treat compulsory nodes first, then descend through the cardinalities
  ###########################################################################################  
  
  def construct_priority_queue(self, schemachildren):
    # priority_queue will store the schemachildren, in the order in which
    # they query data from the XML
    priority_queue = []
    
    # compulsory first.
    for schemachild in schemachildren:
      if schemachild.cardinality == '':
        priority_queue.append(schemachild)

    # then oneormore.
    for schemachild in schemachildren:
      if schemachild.cardinality == '+':
        priority_queue.append(schemachild)

    # then, optional
    for schemachild in schemachildren:
      if schemachild.cardinality == '?':
        priority_queue.append(schemachild)

    # then zeroormore.
    for schemachild in schemachildren:
      if schemachild.cardinality == '*':
        priority_queue.append(schemachild)
        
    return priority_queue

  ###########################################################################################
  # initialise the availability data
  # avail[name][xmlnode] records whether xmlnode is available or not
  ###########################################################################################
  def init_avail_data(self, xmlnode, schemachildren):
    used = {}
    avail = {}
    
    for xml in xmlnode.iterchildren(tag=etree.Element):
      used[xml] = False
    
    for schemachild in schemachildren:
      for name in schemachild.get_possible_names():
        avail[name] = {}

    for name in avail:
      for xmldata in xmlnode.iterchildren(tag=name):
        avail[name][xmldata] = True
        
    return (used, avail)

  ###########################################################################################
  # assign the available xml nodes to the children the schema says should be there
  # in order of priority.
  # xmls[schemachild.schemaname] is the list of xml nodes
  # that schemachild should take
  ###########################################################################################
  def assign_xml_nodes(self, priority_queue, xmlnode, avail):   
    xmls = {}

    for schemachild in priority_queue:
      if schemachild.cardinality in ['', '?']:
        for curtree in schemachild.choices():
          name = curtree.name

          have_fixed_name = False
          if "name" in curtree.attrs:
            datatype = curtree.attrs["name"][0]
            if datatype == 'fixed':
              have_fixed_name = True

          if have_fixed_name is False:
            xml = xmlnode.xpath(name)
          else:
            xml = xmlnode.xpath(name + '[@name="%s"]' % curtree.get_attr("name"))

          for xmldata in xml:
            if avail[name][xmldata]:
              avail[name][xmldata] = False
              xmls[schemachild.schemaname] = [xmldata]
              break 

          if schemachild.schemaname not in xmls:
            if schemachild.cardinality == '':
              xmls[schemachild.schemaname] = copy.deepcopy([])
#            elif schemachild.cardinality == '?':
#              hidden_xmldata = self.find_hidden_xmldata(schemachild, xmlnode)
#              if len(hidden_xmldata) > 0:
#                new_xmldata = hidden_xmldata[0]
#                xmls[schemachild.schemaname] = [new_xmldata]
#                break
            else:
              xmls[schemachild.schemaname] = copy.deepcopy([])
      elif schemachild.cardinality in ['*', '+']:
        xmls[schemachild.schemaname] = copy.deepcopy([])
        for curtree in schemachild.choices():
          name = curtree.name

          have_fixed_name = False
          if "name" in curtree.attrs:
            datatype = curtree.attrs["name"][0]
            if datatype == 'fixed':
              have_fixed_name = True

          if have_fixed_name is False:
            xml = xmlnode.xpath(name)
          else:
            xml = xmlnode.xpath(name + '[@name="%s"]' % curtree.get_attr("name"))

          for xmldata in xml:
            if avail[name][xmldata]:
              avail[name][xmldata] = False
              xmls[schemachild.schemaname].append(xmldata)
                
    return xmls

  ###########################################################################################
  # now that we have assigned the xml nodes, loop through and grab them
  # stuff the tree data in bins[schemachild.schemaname]
  ###########################################################################################
  def assign_xml_children(self, priority_queue, xmlnode, xmls, schemachildren, used, rootdoc):
    # bins[schemachild.schemaname] will store the data associated with schemachild
    bins = {}

    for schemachild in schemachildren:
      bins[schemachild.schemaname] = []
      
    for schemachild in priority_queue:
      if schemachild.cardinality in ['', '?']:
        child = schemachild.copy()
        child.xmlnode = None
        child.active = True
        if len(xmls[schemachild.schemaname]) == 1:
          xmldata = xmls[schemachild.schemaname][0]
          used[xmldata] = True
          self.xml_read_merge(child, xmldata)

          # Was this part of the uncompressed XML file or part of a hidden comment?
          if xmldata.getroottree().getroot() != rootdoc.getroot():
            self.xml_read_core(child.get_current_tree(), xmldata, xmldata.getroottree())
            child.active = False
            child.recurse = False
        else:
          if schemachild.cardinality == '?':
            child.active = False

        bins[schemachild.schemaname] = [child]

      elif schemachild.cardinality in ['*', '+']:
        for xmldata in xmls[schemachild.schemaname]:
          child = schemachild.copy()
          child.active = True
          used[xmldata] = True
          self.xml_read_merge(child, xmldata)
          bins[schemachild.schemaname].append(child)

      if schemachild.cardinality == '+':
        # check that we have at least one.
        count = len(bins[schemachild.schemaname])
        if count == 0:
          child = schemachild.copy()
          child.active = True
          child.xmlnode = None
          bins[schemachild.schemaname] = [child]

      if schemachild.cardinality in ['*', '+']:
        # add an inactive instance
        child = schemachild.copy()
        child.active = False
        child.xmlnode = None
        bins[schemachild.schemaname].append(child)

      # search for neglected choices
      if schemachild.__class__ is choice.Choice and schemachild.cardinality in ['', '?']:
        for child in bins[schemachild.schemaname]:

          # Does the child have a valid XML node attached?
          if not hasattr(child, "xmlnode"): continue
          if child.xmlnode is None: continue

          current_choice = child.get_current_tree()
          for tree_choice in child.l:
            if tree_choice is current_choice: continue

#            # The other choices are compressed and stored in a DIAMOND MAGIC comment. These
#            # should be read in and added to the in-memory tree.
#            hidden_xml = self.find_hidden_xmldata(tree_choice, child.xmlnode.getparent())
#            if len(hidden_xml) > 0:
#              new_xmldata = hidden_xml[0]
#              self.xml_read_merge(tree_choice, new_xmldata)
#              self.xml_read_core(tree_choice, new_xmldata, rootdoc)
                
    return bins

  # find_hidden_xmldata looks for DIAMOND MAGIC COMMENTs in the given xmlnode, decompresses them, and adds
  # them to the tree.
  def find_hidden_xmldata(self, datatree, xmlnode):
    hidden = []
    for xmlchild in xmlnode.iterchildren(tag=etree.Comment):
        text = xmlchild.text
        data = text.split('\n')
        name = data[0]

        if datatree.schemaname in name and "DIAMOND MAGIC COMMENT" in name:
          pickle = data[1]
          uncompressed = bz2.decompress(base64.b64decode(pickle))
          try:
            doc = etree.fromstring(uncompressed)
          except:
            debug.deprint("Error reading compressed XML. Output: %s" % bz2.decompress(base64.b64decode(pickle)), 0)
            sys.exit(1)

          # Comments generated using the 4suite API are incompatable with the new format.
          if uncompressed.find("<?xml version=") != -1:
            debug.dprint("File uses old-style magic comments. Ignoring.")
            return []

          # Iterate over all elements in this newly-decompressed subtree, and add them to the
          # in-memory tree structure.
          for child in doc.iterchildren(tag=etree.Element):
            new_xmldata = child
            hidden.append(new_xmldata)
            break

    return hidden
  
  # Loop over lost nodes, and store their XML so the user can be notified later.
  def check_unused_nodes(self, used): 
    for xml in used:
      if used[xml] is False:
        buf = cStringIO.StringIO()
        buf.write(etree.tostring(xml, pretty_print = True))
        s = buf.getvalue()
        buf.close()
        self.lost_eles += s
  
  # Append the children to the datatree in the order the schema presents them.
  # Order matters here.
  def append_children(self, schemachildren, datatree, bins):
    for schemachild in schemachildren:
      for child in bins[schemachild.schemaname]:
        child.set_parent(datatree)
        datatree.children.append(child)  
      
  # Recurse down the in-memory XML tree, reading elements and merging their
  # information into the in-memory Tree structure.
  def read_children(self, datatree, rootdoc):
    for schild in datatree.children:

      if hasattr(schild, "recurse"):
        if schild.recurse is False:
          continue

      if schild.__class__ is choice.Choice:
        child = schild.get_current_tree()
      else:
        child = schild

      child.children = copy.copy([])
      self.xml_read_core(child, schild.xmlnode, rootdoc)

  # xml_read_core recurses throughout the tree, calling xml_read_merge on the current node "xmlnode" and
  # and reading information about the node's children.
  def xml_read_core(self, datatree, xmlnode, rootdoc):
    """This is the part that recurses, you see."""

    assert len(datatree.children) == 0

    # no information from XML to be had :-/
    if xmlnode is None:
      debug.deprint("Warning: Node %s with no XML information" % datatree.name)
      datatree.add_children(self)
      return

    schemachildren = self.valid_children(datatree)
    
    priority_queue = self.construct_priority_queue(schemachildren) 
    (used, avail) = self.init_avail_data(xmlnode, schemachildren)
    xmls = self.assign_xml_nodes(priority_queue, xmlnode, avail)
    bins = self.assign_xml_children(priority_queue, xmlnode, xmls, schemachildren, used, rootdoc)
    self.append_children(schemachildren, datatree, bins)              
    self.check_unused_nodes(used)
    self.read_children(datatree, rootdoc)

    datatree.recompute_validity()
