# Supplementary material for: Spud 1.0: generalising and automating the user interfaces of scientific computer models
Source: Copernicus journal article supplement (doi:10.5194/gmd-2-33-2009), 2009-03-06
Supplement: Supplementary file 1 [file gmd-2-33-2009-supplement.zip › spud-1.0.7/diamond/doc/main.xml]

<!--
 
  This is a GNOME documentation template, designed by the GNOME
  Documentation Project Team. Please use it for writing GNOME
  documentation, making obvious changes. In particular, all the words
  written in UPPERCASE (with the exception of GNOME) should be
  replaced. As for "legalnotice", please leave the reference
  unchanged.

  Remember that this is a guide, rather than a perfect model to follow
  slavishly. Make your manual logical and readable.  And don't forget
  to remove these comments in your final documentation!  ;-)
-->
<!--
 
      (Do not remove this comment block.)
  Maintained by the GNOME Documentation Project
  http://developer.gnome.org/projects/gdp
  Template version: 2.0 beta
  Template last modified Apr 11, 2002
-->
<!--
 =============Document Header ============================= 
-->
<article id="index" lang="en">
<!--
 please do not change the id; for translations, change lang to 
-->
<!-- appropriate code -->
<articleinfo>
<title>
<application>Diamond</application>
 manual
</title>
<copyright>
<holder>Matthew Whitworth</holder>
</copyright>
<!--
 translators: uncomment this:

  <copyright>
   <year>2002</year>
   <holder>ME-THE-TRANSLATOR (Latin translation)</holder>
  </copyright>

   
-->
<!--
 An address can be added to the publisher information.  If a role is 
     not specified, the publisher/author is the same for all versions of the 
     document.  
-->
<publisher>
<publishername> GNOME Documentation Project </publishername>
</publisher>
 
<!--
 This file  contains link to license for the documentation (GNU FDL), and 
        other legal stuff such as "NO WARRANTY" statement. Please do not change 
	any of this. 
-->
<authorgroup>
<author>
<firstname>Documentation</firstname>
<surname>Matthew Whitworth</surname>
<affiliation>
<orgname>Imperial Applied Modelling and Computation Group</orgname>
<address>
<email>mtw07@doc.ic.ac.uk</email>
</address>
</affiliation>
</author>
<!--
 This is appropriate place for other contributors: translators,
     maintainers,  etc. Commented out by default.
     
      <othercredit role="translator">
		<firstname>Latin</firstname> 
		<surname>Translator 1</surname> 
		<affiliation> 
	  		<orgname>Latin Translation Team</orgname> 
	  		<address> <email>translator@gnome.org</email> </address> 
		</affiliation>
		<contrib>Latin translation</contrib>
      </othercredit>
-->
</authorgroup>
<!--
 According to GNU FDL, revision history is mandatory if you are 
-->
<!--
 modifying/reusing someone else's document.  If not, you can omit it. 
-->
<!--
 Remember to remove the &manrevision; entity from the revision entries other
-->
<!-- than the current revision. -->
<!--
 The revision numbering system for GNOME manuals is as follows: 
-->
<!-- * the revision number consists of two components -->
<!--
 * the first component of the revision number reflects the release version of the GNOME desktop. 
-->
<!--
 * the second component of the revision number is a decimal unit that is incremented with each revision of the manual. 
-->
<!--
 For example, if the GNOME desktop release is V2.x, the first version of the manual that 
-->
<!--
 is written in that desktop timeframe is V2.0, the second version of the manual is V2.1, etc. 
-->
<!--
 When the desktop release version changes to V3.x, the revision number of the manual changes 
-->
<!-- to V3.0, and so on. -->
 
<releaseinfo>
This manual describes version 0.2 of Diamond.
    
</releaseinfo>
 
<legalnotice>
<title>Feedback</title> 
 
<para>
To report a bug or make a suggestion regarding the 
<application>Diamond</application>
 application or
      this manual, follow the directions in the 
<ulink url="ghelp:gnome-feedback" type="help">GNOME Feedback Page</ulink>
. 
      
</para>
 
<!--
 Translators may also add here feedback address for translations 
-->
</legalnotice>
</articleinfo>
 
<indexterm zone="index">
<primary>MY-GNOME-APP</primary>
</indexterm>
 
<indexterm zone="index">
<primary>mygnomeapp</primary>
</indexterm>
 
<!--
 ============= Document Body ============================= 
-->
 
<!--
 ============= Introduction ============================== 
-->
 
<!--
 Use the Introduction section to give a brief overview of what
     the application is and what it does. 
-->
 
<sect1 id="myapp-introduction">
<title>Introduction</title>
 
<para>
The 
<application>Diamond</application>
 application enables you to view image files. 
    
<application>Diamond</application>
 provides the following features:
</para>
 
<itemizedlist>
 
<listitem>
<para>Support for the following image file formats:</para>
 
<itemizedlist>
 
<listitem>
<para>BMP - Windows Bitmap</para>
</listitem>
 
<listitem>
<para>GIF - Graphics Interchange Format</para>
</listitem>
 
<listitem>
<para>ICO - Windows Icon</para>
</listitem>
 
<listitem>
<para>JPEG - Joint Photographic Experts Group</para>
</listitem>
 
<listitem>
<para>PNG - Portable Network Graphics </para>
</listitem>
 
<listitem>
<para>PNM - Portable Anymap from the PPM Toolkit</para>
</listitem>
 
<listitem>
<para>RAS - Sun Raster </para>
</listitem>
 
<listitem>
<para>TIFF - Tagged Image File Format</para>
</listitem>
 
<listitem>
<para>XPM - X Pixmap</para>
</listitem>
</itemizedlist>
</listitem>
 
<listitem>
 
<para>
A variety of zoom levels and full screen viewing, with low usage
	  of memory regardless of the zoom level. 
</para>
</listitem>
 
<listitem>
 
<para>
Bonobo embedding technology that enables you to embed image views
	  in other GNOME applications. 
</para>
</listitem>
</itemizedlist>
 
<note>
<para>This is a note.</para>
</note>
</sect1>
 
<!--
 =========== Getting Started ============================== 
-->
 
<!--
 Use the Getting Started section to describe the steps required
     to start the application and to describe the user interface components
     of the application. If there is other information that it is important
     for readers to know before they start using the application, you should
     also include this information here. 
     If the information about how to get started is very short, you can 
     include it in the Introduction and omit this section. 
-->
 
<sect1 id="myapp-getting-started">
<title>Getting Started</title>
 
<sect2 id="myapp-start">
 
<title>
To Start 
<application>MY-GNOME-APPLICATION</application>
</title>
 
<para>
You can start 
 
<application>
<application>MY-GNOME-APPLICATION</application>
</application>
 in the following ways:
    
</para>
 
<variablelist>
 
<varlistentry>
 
<term>
<guimenu>Applications</guimenu>
 menu
</term>
 
<listitem>
 
<para>
Choose 
    		
 
<menuchoice>
<guisubmenu>Submenu Name </guisubmenu>
<guimenuitem>My-GNOME-APPLICATION</guimenuitem>
</menuchoice>
. 
</para>
</listitem>
</varlistentry>
 
<varlistentry>
<term>Command line</term>
 
<listitem>
 
<para>
To start 
 
<application>
<application>MY-GNOME-APPLICATION</application>
</application>
 from a command line, type the following command, 
    		then press 
<keycap>Return</keycap>
:
</para>
 
<para>
<command>myapp</command>
<replaceable>filename.jpg</replaceable>
</para>
 
<para>
where 
			
<replaceable>filename.jpg</replaceable>
 is the name of the file you
			want to open.
    		
</para>
 
<para>
<application>MY-GNOME-APPLICATION</application>
 opens each file that you specify in a new window.
</para>
</listitem>
</varlistentry>
</variablelist>
</sect2>
 
<sect2 id="myapp-when-start">
 
<title>
When You Start 
<application>MY-GNOME-APPLICATION</application>
</title>
 
<para>
When you start 
 
<application>
<application>MY-GNOME-APPLICATION</application>
</application>
, the following window is displayed.
</para>
<!-- ==== Figure ==== -->
 
<figure id="mainwindow-fig">
 
<title>
<application>MY-GNOME-APPLICATION</application>
 Start Up Window
</title>
 
<screenshot>
 
<mediaobject>
 
<imageobject>
<imagedata fileref="figures/myapp_start_window.png" format="PNG"/>
</imageobject>
 
<!--
 EPS versions of the figures are not required at the moment. 
-->
 
<!--
 
		    <imageobject>
      		<imagedata fileref="figures/image.eps" format="EPS"/>
    		    </imageobject>
	    
-->
 
<textobject>
 
<phrase>
Shows 
<application>MY-GNOME-APPLICATION</application>
 main window. Contains titlebar, menubar, toolbar, display area, and
	      scrollbars. Menubar contains File, View, Settings, and Help menus. 
</phrase>
</textobject>
</mediaobject>
</screenshot>
</figure>
<!-- ==== End of Figure ==== -->
 
<!--
 Include any descriptions of the GUI immediately after the screenshot of the main UI, 
-->
 
<!--
 for example, the items on the menubar and on the toolbar. This section is optional. 
-->
 
<para>
The 
<application>MY-GNOME-APPLICATION</application>
 window contains the following elements:
    
</para>
 
<variablelist>
 
<varlistentry>
<term>Menubar. </term>
 
<listitem>
 
<para>
The menus on the menubar contain all of the commands you need to work with files in 
	
 
<application>
<application>MY-GNOME-APPLICATION</application>
</application>
.
</para>
</listitem>
</varlistentry>
 
<varlistentry>
<term>Toolbar. </term>
 
<listitem>
 
<para>
 The toolbar contains a subset of the commands that you can access from the menubar.
</para>
</listitem>
</varlistentry>
 
<varlistentry>
<term>Statusbar. </term>
 
<listitem>
 
<para>
The statusbar displays information about current 
 
<application>
<application>MY-GNOME-APPLICATION</application>
</application>
 
	activity and contextual information about the menu items. 
</para>
</listitem>
</varlistentry>
</variablelist>
</sect2>
</sect1>
 
<!--
 ================ Usage ================================ 
-->
 
<!--
 Use this section to describe how to use the application to perform the tasks for 
  which the application is designed. 
-->
 
<sect1 id="myapp-usage">
<title>Usage</title>
 
<para>
You can use the 
<application>MY-GNOME-APPLICATION</application>
 application to
      perform the following tasks: 
      
 
<itemizedlist>
 
<listitem>
 
<para>
<xref linkend="myapp-open-image"/>
</para>
</listitem>
 
<listitem>
 
<para>
<xref linkend="myapp-manipulate-view"/>
</para>
</listitem>
 
<listitem>
 
<para>
<xref linkend="myapp-scroll-image"/>
</para>
</listitem>
 
<listitem>
 
<para>
<xref linkend="myapp-close-image"/>
</para>
</listitem>
</itemizedlist>
</para>
 
<!--
 ================ Usage Subsection ================================ 
-->
 
<sect2 id="myapp-open-image">
<title>To Open an Image</title>
 
<para>
To open an image, choose 
	
 
<menuchoice>
<guimenu>File</guimenu>
<guimenuitem>Open Image</guimenuitem>
</menuchoice>
. The 
	
<guilabel>Open Image</guilabel>
 dialog is displayed. Select the file
	that you want to open, then click 
	
<guibutton>OK</guibutton>
. To open another image in a new window,
	choose 
	
 
<menuchoice>
<guimenu>File</guimenu>
<guimenuitem>Create New Window</guimenuitem>
</menuchoice>
. Choose 
	
 
<menuchoice>
<guimenu>File</guimenu>
<guimenuitem>Open Image</guimenuitem>
</menuchoice>
	to select the file that you want to open. You can also drag an image
	from another application such as a file manager to the 
<application>MY-GNOME-APPLICATION</application>

	window. If the 
<application>MY-GNOME-APPLICATION</application>
 window is empty, the application displays
	the image in the window. If the window is not empty, the
	application starts a new window to display the file. The
	application displays the name of the image file and the size
	of the image in pixels in the titlebar of the window. 
</para>
 
<para>

	If you try to open an image file format that 
<application>MY-GNOME-APPLICATION</application>
 does
	not recognize, the application displays an error
	message.
      
</para>
 
<caution>
<para>This is a caution.</para>
</caution>
</sect2>
 
<!--
 ================ Usage Subsection ================================ 
-->
 
<sect2 id="myapp-manipulate-view">
<title>To Manipulate the View of an Image</title>
 
<para>
You can use the following methods to resize the view of an image in
	the 
<application>MY-GNOME-APPLICATION</application>
 window:
</para>
 
<itemizedlist>
 
<listitem>
 
<para>
To enlarge the view of an image, choose 
	    
 
<menuchoice>
<guimenu>View</guimenu>
<guimenuitem>Zoom In</guimenuitem>
</menuchoice>
.
</para>
</listitem>
 
<listitem>
 
<para>
To shrink the view of an image, choose 
	    
 
<menuchoice>
<guimenu>View</guimenu>
<guimenuitem>Zoom Out</guimenuitem>
</menuchoice>
.
</para>
</listitem>
 
<listitem>
 
<para>
To view the image at its actual size, choose 
	    
 
<menuchoice>
<guimenu>View</guimenu>
<guimenuitem>Zoom 1:1</guimenuitem>
</menuchoice>
. 
</para>
</listitem>
 
<listitem>
 
<para>
To enlarge or shrink the view of an image so that the image
	    fits the 
<application>MY-GNOME-APPLICATION</application>
 window, choose 
	    
 
<menuchoice>
<guimenu>View</guimenu>
<guimenuitem>Fit to Window</guimenuitem>
</menuchoice>
.
</para>
</listitem>
 
<listitem>
 
<para>
To enlarge or shrink the image to a specific zoom factor,
	    choose 
	    
 
<menuchoice>
<guimenu>View</guimenu>
<guimenuitem>Zoom factor</guimenuitem>
</menuchoice>
, then choose the appropriate zoom factor from the
	    drop-down list.
</para>
</listitem>
 
<listitem>
 
<para>
To display the image in full screen mode, choose 
	    
 
<menuchoice>
<guimenu>View</guimenu>
<guimenuitem>Full Screen</guimenuitem>
</menuchoice>
. Full screen mode displays the image in a window that
	    fills the full screen. The window does not contain a
	    window frame, titlebar, 
	    menubar, or toolbar. To exit from this mode, press the 
	    
<keycap>Esc</keycap>
 key or 
	    
 
<keycombo>
<keycap>Ctrl</keycap>
<keycap>W</keycap>
</keycombo>
.
	  
</para>
</listitem>
</itemizedlist>
 
<tip>
<para>This is a tip.</para>
</tip>
</sect2>
 
<!--
 ================ Usage Subsection ================================ 
-->
 
<sect2 id="myapp-scroll-image">
<title>To Scroll an Image</title>
 
<para>
To scroll around an image that is larger than the image window or
	full screen window, you can use the following methods:
</para>
 
<itemizedlist>
 
<listitem>
<para>Use the arrow keys on the keyboard.</para>
</listitem>
 
<listitem>
 
<para>
Drag the image in the opposite direction to the direction in
	    which you want to scroll. For example, if you want to
	      scroll down the image, 
	    drag the image upwards in the window.
</para>
</listitem>
 
<listitem>
<para>Use the scrollbars on the window.</para>
</listitem>
</itemizedlist>
</sect2>
 
<!--
 ================ Usage Subsection ================================ 
-->
 
<sect2 id="myapp-close-image">
<title>To Close an Image</title>
 
<para>
To close an image, choose 
	
 
<menuchoice>
<guimenu>File</guimenu>
<guimenuitem>Close This Window</guimenuitem>
</menuchoice>
. If the window is the last
	
<application>MY-GNOME-APPLICATION</application>
 window open, the application exits. 
</para>
 
<para>
To quit 
<application>MY-GNOME-APPLICATION</application>
 and close all of the
	windows that you opened in the current session, choose 
	
 
<menuchoice>
<guimenu>File</guimenu>
<guimenuitem>Exit</guimenuitem>
</menuchoice>
. 
</para>
 
<warning>
<para>This is a warning.</para>
</warning>
</sect2>
</sect1>
 
<!--
 ============= Customization ============================= 
-->
 
<!--
 Use this section to describe how to customize the application. 
-->
 
<sect1 id="myapp-prefs">
<title>Settings</title>
 
<para>
To configure 
<application>MY-GNOME-APPLICATION</application>
, choose 
      
 
<menuchoice>
<guimenu>Settings</guimenu>
<guimenuitem>Preferences</guimenuitem>
</menuchoice>
. The 
      
<guilabel>Preferences</guilabel>
 dialog contains the following tabbed
      sections:
</para>
 
<itemizedlist>
 
<listitem>
 
<para>
<xref linkend="myapp-prefs-display"/>
</para>
</listitem>
 
<listitem>
 
<para>
<xref linkend="myapp-prefs-viewers"/>
</para>
</listitem>
</itemizedlist>
 
<!--
 =============== Customization Subsection ================ 
-->
 
<!--
 Use a new section to describe different tabbed sections on the Settings or Preferences
	     dialog. 
-->
 
<sect2 id="myapp-prefs-display">
<title>Display</title>
 
<variablelist>
 
<varlistentry>
 
<term>
<guilabel>Interpolation type</guilabel>
</term>
 
<listitem>
 
<para>
Use this drop-down list box to specify the
	      interpolation method that
	      
<application>MY-GNOME-APPLICATION</application>
 uses when the
	      application resizes images. Select one of the following
	      options:
</para>
 
<itemizedlist>
 
<listitem>
 
<para>
<guilabel>Nearest neighbor</guilabel>
</para>
 
<para>
This method of interpolation takes a location in the
		  original image and replicates the pixel that is
		  nearest to this location. When 
		  you zoom in on an image, the pixels are
		  replicated. When you zoom out of an 
		  image, the image loses some of its detail. 
</para>
</listitem>
 
<listitem>
 
<para>
<guilabel>Bilinear</guilabel>
</para>
 
<para>
This is a simple and fast method of interpolation. When
		  you zoom in on an image, 
<application>MY-GNOME-APPLICATION</application>
 uses up to four
		  adjacent pixels to compute the colors of the new
		  pixels. When you zoom out of 
		  an image, 
<application>MY-GNOME-APPLICATION</application>
 averages regions of color in the
		  existing image to compute the colors of the pixels. 
</para>
</listitem>
 
<listitem>
 
<para>
<guilabel>Hyperbolic</guilabel>
</para>
 
<para>
This is a high-quality, slow method of interpolation. The
		  application performs interpolation on the image in
		  the manner described in 
		  Digital Image Warping by George Wolberg.
</para>
</listitem>
</itemizedlist>
 
<para>
Default: 
	      
<guilabel>Nearest neighbor</guilabel>
.
</para>
</listitem>
</varlistentry>
 
<varlistentry>
 
<term>
<guilabel>Transparency type</guilabel>
</term>
 
<listitem>
 
<para>
Use this drop-down list box to specify how
	      
<application>MY-GNOME-APPLICATION</application>
 displays transparent or partially opaque
	      backgrounds in images. Select one of the following options:
</para>
 
<itemizedlist>
 
<listitem>
 
<para>
<guilabel>Dark checks</guilabel>
</para>
<para>This option displays black and dark gray checks.</para>
</listitem>
 
<listitem>
 
<para>
<guilabel>Midtone checks</guilabel>
</para>
 
<para>
This option displays dark gray and light gray
		  checks.
</para>
</listitem>
 
<listitem>
 
<para>
<guilabel>Light checks</guilabel>
</para>
<para>This option displays light gray and white checks.</para>
</listitem>
 
<listitem>
 
<para>
<guilabel>Black only</guilabel>
</para>
<para>This option displays solid black.</para>
</listitem>
 
<listitem>
 
<para>
<guilabel>Gray only</guilabel>
</para>
<para>This option displays solid gray.</para>
</listitem>
 
<listitem>
 
<para>
<guilabel>White only</guilabel>
</para>
<para>This option displays solid white.</para>
</listitem>
</itemizedlist>
 
<para>
Default: 
	      
<guilabel>Dark checks</guilabel>
.
</para>
</listitem>
</varlistentry>
 
<varlistentry>
 
<term>
<guilabel>Check size</guilabel>
</term>
 
<listitem>
 
<para>
Use this drop-down list box to specify the size of the checks
	      to use to display transparent or partially opaque
	      backgrounds in images. This 
	      option is only relevant if you choose 
	      
<guilabel>Dark checks</guilabel>
, 
	      
<guilabel>Midtone checks</guilabel>
, or 
	      
<guilabel>Light checks</guilabel>
 from the 
	      
<guilabel>Transparency type</guilabel>
 drop-down list box.
	      Select one of the following options:
</para>
 
<itemizedlist>
 
<listitem>
 
<para>
<guilabel>Small</guilabel>
</para>
</listitem>
 
<listitem>
 
<para>
<guilabel>Medium</guilabel>
</para>
</listitem>
 
<listitem>
 
<para>
<guilabel>Large</guilabel>
</para>
</listitem>
</itemizedlist>
 
<para>
Default: 
	      
<guilabel>Small</guilabel>
.
</para>
</listitem>
</varlistentry>
 
<varlistentry>
 
<term>
<guilabel>Dither type</guilabel>
</term>
 
<listitem>
 
<para>
Use this drop-down list box to specify the dithering method
	      to use to display images. Dithering is a technique that
	      is used to simulate 
	      colors in the original image file but that your system
	      can not display. Select 
	      one of the following options:
</para>
 
<itemizedlist>
 
<listitem>
 
<para>
<guilabel>None</guilabel>
</para>
<para>This option does not use dithering. </para>
</listitem>
 
<listitem>
 
<para>
<guilabel>Normal (pseudocolor)</guilabel>
</para>
 
<para>
This option performs dithering on pseudocolor displays,
		  which use a limited palette of colors. 
</para>
</listitem>
 
<listitem>
 
<para>
<guilabel>Maximum (high color)</guilabel>
</para>
 
<para>
This option performs dithering on pseudocolor and high
		  color displays. 
</para>
</listitem>
</itemizedlist>
 
<para>
Default: 
	      
<guilabel>None</guilabel>
.
</para>
</listitem>
</varlistentry>
 
<varlistentry>
 
<term>
<guilabel>Two-pass scrolling</guilabel>
</term>
 
<listitem>
 
<para>
Select this option to render an image in two passes
	      when you scroll the image quickly. The first pass
	      renders a low quality version of the image. The second
	      pass renders a full quality version of the image over
	      the low quality version. Two-pass scrolling enables you
	      to view at least a low quality version of the image at
	      all times regardless of how quickly you scroll the
	      image. 
	    
</para>
<para>Default: unselected.</para>
</listitem>
</varlistentry>
</variablelist>
</sect2>
 
<!--
 ============= Customization Subsection ===================== 
-->
 
<!--
 Another tabbed section on the Preferences dialog. 
-->
 
<sect2 id="myapp-prefs-viewers">
<title>Viewers</title>
 
<para>
You can set the following viewer preferences: 
	
 
<itemizedlist>
 
<listitem>
 
<para>
<xref linkend="myapp-viewer-prefs-image-window"/>
</para>
</listitem>
 
<listitem>
 
<para>
<xref linkend="myapp-viewer-prefs-full-screen"/>
</para>
</listitem>
</itemizedlist>
</para>
 
<sect3 id="myapp-viewer-prefs-image-window">
<title>Image Windows</title>
 
<para>
The 
	  
<guilabel>Image Windows</guilabel>
 group contains the preferences
	  that you can set to view images in image windows.
</para>
 
<variablelist>
 
<varlistentry>
 
<term>
<guilabel>Use scrollbars</guilabel>
</term>
 
<listitem>
 
<para>
Use this drop-down list box to specify when to use
		scrollbars to scroll through an image. Select one of
		the following options:
</para>
 
<itemizedlist>
 
<listitem>
 
<para>
<guilabel>Never</guilabel>
</para>
 
<para>
This option never displays scrollbars. You can use the
		    arrow keys on the keyboard or the mouse to scroll
		    through the image. 
</para>
</listitem>
 
<listitem>
 
<para>
<guilabel>Only if image does not fit</guilabel>
</para>
 
<para>
This option displays scrollbars when the image is
		    larger than the image window.
</para>
</listitem>
</itemizedlist>
 
<para>
Default: 
		
<guilabel>Never</guilabel>
.
</para>
</listitem>
</varlistentry>
 
<varlistentry>
 
<term>
<guilabel>Pick window size and zoom factor
		automatically</guilabel>
</term>
 
<listitem>
 
<para>
Select this option to resize the image window to fit the
		image or to resize the image to fit the image
		window. If the image is small, 
		
<application>MY-GNOME-APPLICATION</application>
 resizes the image window to fit the image. If
		the image is large, 
<application>MY-GNOME-APPLICATION</application>
 resizes the image to fit
		the image window. 
</para>
<para>Default: unselected.</para>
</listitem>
</varlistentry>
 
<varlistentry>
 
<term>
<guilabel>Open images in a new window</guilabel>
</term>
 
<listitem>
 
<para>
Select this option to open a new
		
<application>MY-GNOME-APPLICATION</application>
 window each time you open an image. If you do
		not select this option, 
<application>MY-GNOME-APPLICATION</application>
 replaces the existing
		image with the new image when you open an image. 
</para>
<para>Default: unselected.</para>
</listitem>
</varlistentry>
</variablelist>
</sect3>
 
<sect3 id="myapp-viewer-prefs-full-screen">
<title>Full Screen</title>
 
<para>
The 
	  
<guilabel>Full Screen</guilabel>
 group contains the preferences that
	  you can set to view images in full screen mode.
</para>
 
<variablelist>
 
<varlistentry>
 
<term>
<guilabel>Use scrollbars</guilabel>
</term>
 
<listitem>
 
<para>
Use this drop-down list box to specify when to use
		scrollbars to scroll through an image. Select one of the following
		options:
</para>
 
<itemizedlist>
 
<listitem>
 
<para>
<guilabel>Never</guilabel>
</para>
 
<para>
This option never displays scrollbars. You can use the
		    arrow keys on the keyboard or the mouse to scroll
		    through the image. 
</para>
</listitem>
 
<listitem>
 
<para>
<guilabel>Only if image does not fit</guilabel>
</para>
 
<para>
This option displays scrollbars when the image is
		    larger than the full screen. 
</para>
</listitem>
</itemizedlist>
 
<para>
Default: 
		
<guilabel>Never</guilabel>
.
</para>
</listitem>
</varlistentry>
 
<varlistentry>
 
<term>
<guilabel>Use 1:1 zoom factor</guilabel>
</term>
 
<listitem>
 
<para>
Select this option to use the 1:1 zoom factor when you open
		an image. The 1:1 zoom factor displays the image at
		its actual size. 
</para>
<para>Default: selected.</para>
</listitem>
</varlistentry>
 
<varlistentry>
 
<term>
<guilabel>Use same zoom factor as image window</guilabel>
</term>
 
<listitem>
 
<para>
Select this option to use the same zoom factor that the
		application uses to display the image in an image
	      window. 
</para>
<para>Default: unselected.</para>
</listitem>
</varlistentry>
 
<varlistentry>
 
<term>
<guilabel>Fit all images to screen</guilabel>
</term>
 
<listitem>
 
<para>
Select this option to resize images to fill the full screen
		when you open the images in full screen mode. 
</para>
<para>Default: unselected.</para>
</listitem>
</varlistentry>
 
<varlistentry>
 
<term>
<guilabel>Fit standard-sized images to screen</guilabel>
</term>
 
<listitem>
 
<para>
Select this option to automatically resize images
		that are the same size as standard screens so that the
		images fill the full screen when you open them in full
		screen mode. If you select this option, 
<application>MY-GNOME-APPLICATION</application>
 ignores
		the settings for the previous three options when you
		open an image that is the same size as a standard
		screen.  Examples of standard screen sizes are 640 x
		480 pixels, 1024 x 768 pixels, and so on. 
</para>
<para>Default: unselected.</para>
</listitem>
</varlistentry>
 
<varlistentry>
 
<term>
<guilabel>Put a bevel around the edge of the screen</guilabel>
</term>
 
<listitem>
 
<para>
Select this option to display a 3D beveled border around
		the full screen view of an image. 
</para>
<para>Default: unselected.</para>
</listitem>
</varlistentry>
</variablelist>
</sect3>
</sect2>
</sect1>
 
<!--
 ============= Bugs ================================== 
-->
 
<!--
 This section is optional and is commented out by default. 
     You can use it to describe known bugs and limitations of the 
	  program if there are any - please be frank and list all
     problems you know of. 
  
  <sect1 id="mayapp-bugs">
  <title>Known Bugs and Limitations</title>
  <para> </para>
 </sect1>
-->
 
<!--
 ============= About ================================== 
-->
 
<!--
 This section contains info about the program (not docs), such as
      author's name(s), web page, license, feedback address. This
      section is optional: primary place for this info is "About.." box of
      the program. However, if you do wish to include this info in the
      manual, this is the place to put it. Alternatively, you can put this information in the title page.
-->
 
<sect1 id="myapp-about">
 
<title>
About 
<application>MY-GNOME-APPLICATION</application>
</title>
 
<para>
<application>MY-GNOME-APPLICATION</application>
 was written by GNOME-HACKER
      (
<email>hacker@gnome.org</email>
). To find more information about
      
<application>MY-GNOME-APPLICATION</application>
, please visit the 
      
<ulink url="http://www.my-gnome-app.org" type="http">MY-GNOME-APP Web
	page</ulink>
. 
</para>
 
<para>

      To report a bug or make a suggestion regarding this application or
      this manual, follow the directions in this 
      
<ulink url="ghelp:gnome-feedback" type="help">document</ulink>
.
    
</para>
 
<para>
 This program is distributed under the terms of the GNU
      General Public license as published by the Free Software
      Foundation; either version 2 of the License, or (at your option)
      any later version. A copy of this license can be found at this
      
<ulink url="ghelp:gpl" type="help">link</ulink>
, or in the file
      COPYING included with the source code of this program. 
</para>
</sect1>
</article>
