# Supplementary material for: Spud 1.0: generalising and automating the user interfaces of scientific computer models
Source: Copernicus journal article supplement (doi:10.5194/gmd-2-33-2009), 2009-03-06
Supplement: Supplementary file 1 [file gmd-2-33-2009-supplement.zip › spud-1.0.7/diamond/gui/gui.glade]

<?xml version="1.0" encoding="UTF-8" standalone="no"?>
<!DOCTYPE glade-interface SYSTEM "glade-2.0.dtd">
<!--*- mode: xml -*-->
<glade-interface>
  <widget class="GtkWindow" id="mainWindow">
    <property name="title" translatable="yes">Diamond</property>
    <property name="default_width">800</property>
    <property name="default_height">600</property>
    <signal name="destroy" handler="on_quit"/>
    <child>
      <widget class="GtkVBox" id="mainVbox">
        <property name="visible">True</property>
        <child>
          <widget class="GtkMenuBar" id="menu">
            <property name="visible">True</property>
            <child>
              <widget class="GtkMenuItem" id="menuFile">
                <property name="visible">True</property>
                <property name="label" translatable="yes">_File</property>
                <property name="use_underline">True</property>
                <child>
                  <widget class="GtkMenu" id="menuitemFile">
                    <child>
                      <widget class="GtkImageMenuItem" id="file_new">
                        <property name="visible">True</property>
                        <property name="extension_events">GDK_EXTENSION_EVENTS_ALL</property>
                        <property name="label">gtk-new</property>
                        <property name="use_underline">True</property>
                        <property name="use_stock">True</property>
                        <signal name="activate" handler="on_new"/>
                      </widget>
                    </child>
                    <child>
                      <widget class="GtkImageMenuItem" id="file_open">
                        <property name="visible">True</property>
                        <property name="label">gtk-open</property>
                        <property name="use_underline">True</property>
                        <property name="use_stock">True</property>
                        <signal name="activate" handler="on_open"/>
                      </widget>
                    </child>
                    <child>
                      <widget class="GtkMenuItem" id="file_open_schema">
                        <property name="visible">True</property>
                        <property name="events">GDK_POINTER_MOTION_MASK | GDK_POINTER_MOTION_HINT_MASK | GDK_BUTTON_PRESS_MASK | GDK_BUTTON_RELEASE_MASK</property>
                        <property name="label" translatable="yes">Open schema</property>
                        <property name="use_underline">True</property>
                        <signal name="activate" handler="on_open_schema"/>
                      </widget>
                    </child>
                    <child>
                      <widget class="GtkImageMenuItem" id="file_save">
                        <property name="visible">True</property>
                        <property name="label">gtk-save</property>
                        <property name="use_underline">True</property>
                        <property name="use_stock">True</property>
                        <signal name="activate" handler="on_save"/>
                      </widget>
                    </child>
                    <child>
                      <widget class="GtkImageMenuItem" id="file_saveas">
                        <property name="visible">True</property>
                        <property name="label">gtk-save-as</property>
                        <property name="use_underline">True</property>
                        <property name="use_stock">True</property>
                        <signal name="activate" handler="on_save_as"/>
                      </widget>
                    </child>
                    <child>
                      <widget class="GtkSeparatorMenuItem" id="file_separator">
                        <property name="visible">True</property>
                      </widget>
                    </child>
                    <child>
                      <widget class="GtkImageMenuItem" id="file_quit">
                        <property name="visible">True</property>
                        <property name="label">gtk-quit</property>
                        <property name="use_underline">True</property>
                        <property name="use_stock">True</property>
                        <signal name="activate" handler="on_quit"/>
                      </widget>
                    </child>
                  </widget>
                </child>
              </widget>
            </child>
            <child>
              <widget class="GtkMenuItem" id="menuActions">
                <property name="visible">True</property>
                <property name="label" translatable="yes">_Edit</property>
                <property name="use_underline">True</property>
                <child>
                  <widget class="GtkMenu" id="menuitemActions">
                    <child>
                      <widget class="GtkImageMenuItem" id="actions_find">
                        <property name="visible">True</property>
                        <property name="events">GDK_POINTER_MOTION_MASK | GDK_POINTER_MOTION_HINT_MASK | GDK_BUTTON_PRESS_MASK | GDK_BUTTON_RELEASE_MASK</property>
                        <property name="label" translatable="yes">gtk-find</property>
                        <property name="use_underline">True</property>
                        <property name="use_stock">True</property>
                        <signal name="activate" handler="on_find"/>
                      </widget>
                    </child>
                    <child>
                      <widget class="GtkImageMenuItem" id="menuitem1">
                        <property name="visible">True</property>
                        <property name="tooltip" translatable="yes">Copy spud path</property>
                        <property name="label" translatable="yes">Copy spud path</property>
                        <property name="use_underline">True</property>
                        <signal name="activate" handler="on_copy_spud_path"/>
                        <child internal-child="image">
                          <widget class="GtkImage" id="menu-item-image1">
                            <property name="stock">gtk-copy</property>
                          </widget>
                        </child>
                      </widget>
                    </child>
                  </widget>
                </child>
              </widget>
            </child>
            <child>
              <widget class="GtkMenuItem" id="View">
                <property name="visible">True</property>
                <property name="label" translatable="yes">View</property>
                <property name="use_underline">True</property>
                <child>
                  <widget class="GtkMenu" id="menuItemView">
                    <property name="visible">True</property>
                    <child>
                      <widget class="GtkMenuItem" id="expand_all">
                        <property name="visible">True</property>
                        <property name="events">GDK_POINTER_MOTION_MASK | GDK_POINTER_MOTION_HINT_MASK | GDK_BUTTON_PRESS_MASK | GDK_BUTTON_RELEASE_MASK</property>
                        <property name="label" translatable="yes">Expand all</property>
                        <property name="use_underline">True</property>
                        <signal name="activate" handler="on_expand_all"/>
                        <accelerator key="equal" modifiers="GDK_CONTROL_MASK" signal="activate"/>
                      </widget>
                    </child>
                    <child>
                      <widget class="GtkMenuItem" id="collapse_all">
                        <property name="visible">True</property>
                        <property name="events">GDK_POINTER_MOTION_MASK | GDK_POINTER_MOTION_HINT_MASK | GDK_BUTTON_PRESS_MASK | GDK_BUTTON_RELEASE_MASK</property>
                        <property name="extension_events">GDK_EXTENSION_EVENTS_ALL</property>
                        <property name="label" translatable="yes">Collapse all</property>
                        <property name="use_underline">True</property>
                        <signal name="activate" handler="on_collapse_all"/>
                        <accelerator key="minus" modifiers="GDK_CONTROL_MASK" signal="activate"/>
                      </widget>
                    </child>
                  </widget>
                </child>
              </widget>
            </child>
            <child>
              <widget class="GtkMenuItem" id="Validate">
                <property name="visible">True</property>
                <property name="label" translatable="yes">Validate</property>
                <property name="use_underline">True</property>
                <child>
                  <widget class="GtkMenu" id="menu2">
                    <property name="visible">True</property>
                    <child>
                      <widget class="GtkMenuItem" id="actions_validate">
                        <property name="visible">True</property>
                        <property name="label" translatable="yes">Validate XML</property>
                        <property name="use_underline">True</property>
                        <signal name="activate" handler="on_validate"/>
                      </widget>
                    </child>
                    <child>
                      <widget class="GtkMenuItem" id="actions_svalidate">
                        <property name="visible">True</property>
                        <property name="events">GDK_POINTER_MOTION_MASK | GDK_POINTER_MOTION_HINT_MASK | GDK_BUTTON_PRESS_MASK | GDK_BUTTON_RELEASE_MASK</property>
                        <property name="label" translatable="yes">Validate Schematron</property>
                        <property name="use_underline">True</property>
                        <signal name="activate" handler="on_validate_schematron"/>
                      </widget>
                    </child>
                  </widget>
                </child>
              </widget>
            </child>
            <child>
              <widget class="GtkMenuItem" id="Tools1">
                <property name="visible">True</property>
                <property name="label" translatable="yes">Tools</property>
                <property name="use_underline">True</property>
                <child>
                  <widget class="GtkMenu" id="menu4">
                    <property name="visible">True</property>
                    <child>
                      <widget class="GtkCheckMenuItem" id="display_properties">
                        <property name="visible">True</property>
                        <property name="tooltip" translatable="yes">Display the option properties on the right hand side of the main window.</property>
                        <property name="label" translatable="yes">Display properties</property>
                        <property name="use_underline">True</property>
                        <property name="active">True</property>
                        <signal name="toggled" handler="on_display_properties_toggled"/>
                        <accelerator key="p" modifiers="GDK_CONTROL_MASK" signal="activate"/>
                      </widget>
                    </child>
                    <child>
                      <widget class="GtkMenuItem" id="Statistics">
                        <property name="visible">True</property>
                        <property name="events">GDK_POINTER_MOTION_MASK | GDK_POINTER_MOTION_HINT_MASK | GDK_BUTTON_PRESS_MASK | GDK_BUTTON_RELEASE_MASK</property>
                        <property name="label" translatable="yes">Statistics</property>
                        <property name="use_underline">True</property>
                        <signal name="activate" handler="on_statistics"/>
                        <accelerator key="minus" modifiers="GDK_CONTROL_MASK" signal="activate"/>
                      </widget>
                    </child>
                    <child>
                      <widget class="GtkMenuItem" id="Console">
                        <property name="visible">True</property>
                        <property name="events">GDK_POINTER_MOTION_MASK | GDK_POINTER_MOTION_HINT_MASK | GDK_BUTTON_PRESS_MASK | GDK_BUTTON_RELEASE_MASK</property>
                        <property name="label" translatable="yes">Console</property>
                        <property name="use_underline">True</property>
                        <signal name="activate" handler="on_console"/>
                        <accelerator key="equal" modifiers="GDK_CONTROL_MASK" signal="activate"/>
                      </widget>
                    </child>
                    <child>
                      <widget class="GtkMenuItem" id="actions_asserts">
                        <property name="visible">True</property>
                        <property name="events">GDK_POINTER_MOTION_MASK | GDK_POINTER_MOTION_HINT_MASK | GDK_BUTTON_PRESS_MASK | GDK_BUTTON_RELEASE_MASK</property>
                        <property name="label" translatable="yes">Run fluidity asserts</property>
                        <property name="use_underline">True</property>
                        <signal name="activate" handler="on_fluidity_asserts"/>
                        <child>
                          <widget class="GtkMenu" id="menu4">
                            <property name="visible">True</property>
                          </widget>
                        </child>
                      </widget>
                    </child>
                    <child>
                      <widget class="GtkMenuItem" id="Visualise initial setup">
                        <property name="visible">True</property>
                        <property name="events">GDK_POINTER_MOTION_MASK | GDK_POINTER_MOTION_HINT_MASK | GDK_BUTTON_PRESS_MASK | GDK_BUTTON_RELEASE_MASK</property>
                        <property name="label" translatable="yes">Visualise initial setup</property>
                        <property name="use_underline">True</property>
                        <signal name="activate" handler="on_visualise"/>
                      </widget>
                    </child>
                  </widget>
                </child>
              </widget>
            </child>
            <child>
              <widget class="GtkMenuItem" id="menuHelp">
                <property name="visible">True</property>
                <property name="label" translatable="yes">_Help</property>
                <property name="use_underline">True</property>
                <child>
                  <widget class="GtkMenu" id="menuitemHelp">
                    <child>
                      <widget class="GtkImageMenuItem" id="help_about">
                        <property name="visible">True</property>
                        <property name="label" translatable="yes">gtk-about</property>
                        <property name="use_underline">True</property>
                        <property name="use_stock">True</property>
                        <signal name="activate" handler="on_about"/>
                      </widget>
                    </child>
                  </widget>
                </child>
              </widget>
            </child>
          </widget>
          <packing>
            <property name="expand">False</property>
            <property name="fill">False</property>
          </packing>
        </child>
        <child>
          <widget class="GtkHPaned" id="mainHPanes">
            <property name="visible">True</property>
            <property name="can_focus">True</property>
            <property name="events">GDK_POINTER_MOTION_MASK | GDK_POINTER_MOTION_HINT_MASK | GDK_BUTTON_PRESS_MASK | GDK_BUTTON_RELEASE_MASK</property>
            <child>
              <widget class="GtkScrolledWindow" id="scrolledWindow">
                <property name="width_request">200</property>
                <property name="visible">True</property>
                <property name="can_focus">True</property>
                <property name="hscrollbar_policy">GTK_POLICY_AUTOMATIC</property>
                <property name="vscrollbar_policy">GTK_POLICY_AUTOMATIC</property>
                <child>
                  <widget class="GtkTreeView" id="optionsTree">
                    <property name="visible">True</property>
                    <property name="can_focus">True</property>
                    <property name="enable_search">False</property>
                  </widget>
                </child>
              </widget>
              <packing>
                <property name="resize">True</property>
                <property name="shrink">False</property>
              </packing>
            </child>
            <child>
              <widget class="GtkFrame" id="optionsFrame">
                <property name="width_request">200</property>
                <property name="visible">True</property>
                <property name="label_xalign">0</property>
                <property name="shadow_type">GTK_SHADOW_NONE</property>
                <child>
                  <widget class="GtkAlignment" id="optionsFrameAlignment">
                    <property name="visible">True</property>
                    <property name="xalign">0</property>
                    <property name="yalign">0</property>
                    <property name="top_padding">6</property>
                    <property name="left_padding">12</property>
                    <child>
                      <widget class="GtkVPaned" id="optionsFrameVPanes1">
                        <property name="visible">True</property>
                        <property name="can_focus">True</property>
                        <property name="events">GDK_POINTER_MOTION_MASK | GDK_POINTER_MOTION_HINT_MASK | GDK_BUTTON_PRESS_MASK | GDK_BUTTON_RELEASE_MASK</property>
                        <child>
                          <widget class="GtkFrame" id="descriptionFrame">
                            <property name="visible">True</property>
                            <property name="events">GDK_POINTER_MOTION_MASK | GDK_POINTER_MOTION_HINT_MASK | GDK_BUTTON_PRESS_MASK | GDK_BUTTON_RELEASE_MASK</property>
                            <property name="label_xalign">0</property>
                            <property name="shadow_type">GTK_SHADOW_NONE</property>
                            <child>
                              <widget class="GtkScrolledWindow" id="descriptionFrameScrolledWindow">
                                <property name="visible">True</property>
                                <property name="can_focus">True</property>
                                <property name="events">GDK_POINTER_MOTION_MASK | GDK_POINTER_MOTION_HINT_MASK | GDK_BUTTON_PRESS_MASK | GDK_BUTTON_RELEASE_MASK</property>
                                <property name="hscrollbar_policy">GTK_POLICY_AUTOMATIC</property>
                                <property name="vscrollbar_policy">GTK_POLICY_AUTOMATIC</property>
                                <child>
                                  <widget class="GtkTextView" id="nodeDescription">
                                    <property name="height_request">50</property>
                                    <property name="visible">True</property>
                                    <property name="can_focus">True</property>
                                    <property name="events">GDK_POINTER_MOTION_MASK | GDK_POINTER_MOTION_HINT_MASK | GDK_BUTTON_PRESS_MASK | GDK_BUTTON_RELEASE_MASK</property>
                                    <property name="editable">False</property>
                                    <property name="wrap_mode">GTK_WRAP_WORD</property>
                                    <property name="cursor_visible">False</property>
                                  </widget>
                                </child>
                              </widget>
                            </child>
                            <child>
                              <widget class="GtkLabel" id="descriptionFrameLabel">
                                <property name="visible">True</property>
                                <property name="events">GDK_POINTER_MOTION_MASK | GDK_POINTER_MOTION_HINT_MASK | GDK_BUTTON_PRESS_MASK | GDK_BUTTON_RELEASE_MASK</property>
                                <property name="label" translatable="yes">&lt;b&gt;Description&lt;/b&gt;</property>
                                <property name="use_markup">True</property>
                              </widget>
                              <packing>
                                <property name="type">label_item</property>
                              </packing>
                            </child>
                          </widget>
                          <packing>
                            <property name="resize">False</property>
                            <property name="shrink">False</property>
                          </packing>
                        </child>
                        <child>
                          <widget class="GtkVPaned" id="optionsFrameVPanes2">
                            <property name="visible">True</property>
                            <property name="can_focus">True</property>
                            <property name="events">GDK_POINTER_MOTION_MASK | GDK_POINTER_MOTION_HINT_MASK | GDK_BUTTON_PRESS_MASK | GDK_BUTTON_RELEASE_MASK</property>
                            <child>
                              <widget class="GtkVBox" id="attributeDataVBox">
                                <property name="visible">True</property>
                                <property name="events">GDK_POINTER_MOTION_MASK | GDK_POINTER_MOTION_HINT_MASK | GDK_BUTTON_PRESS_MASK | GDK_BUTTON_RELEASE_MASK</property>
                                <child>
                                  <widget class="GtkFrame" id="attributeFrame">
                                    <property name="visible">True</property>
                                    <property name="events">GDK_POINTER_MOTION_MASK | GDK_POINTER_MOTION_HINT_MASK | GDK_BUTTON_PRESS_MASK | GDK_BUTTON_RELEASE_MASK</property>
                                    <property name="label_xalign">0</property>
                                    <property name="shadow_type">GTK_SHADOW_NONE</property>
                                    <child>
                                      <widget class="GtkScrolledWindow" id="attributeFrameScrolledWindow">
                                        <property name="visible">True</property>
                                        <property name="can_focus">True</property>
                                        <property name="events">GDK_POINTER_MOTION_MASK | GDK_POINTER_MOTION_HINT_MASK | GDK_BUTTON_PRESS_MASK | GDK_BUTTON_RELEASE_MASK</property>
                                        <property name="hscrollbar_policy">GTK_POLICY_AUTOMATIC</property>
                                        <property name="vscrollbar_policy">GTK_POLICY_AUTOMATIC</property>
                                        <child>
                                          <widget class="GtkTreeView" id="nodeAttributes">
                                            <property name="height_request">100</property>
                                            <property name="visible">True</property>
                                            <property name="can_focus">True</property>
                                            <property name="events">GDK_POINTER_MOTION_MASK | GDK_POINTER_MOTION_HINT_MASK | GDK_BUTTON_PRESS_MASK | GDK_BUTTON_RELEASE_MASK</property>
                                          </widget>
                                        </child>
                                      </widget>
                                    </child>
                                    <child>
                                      <widget class="GtkLabel" id="attributeFrameLabel">
                                        <property name="visible">True</property>
                                        <property name="events">GDK_POINTER_MOTION_MASK | GDK_POINTER_MOTION_HINT_MASK | GDK_BUTTON_PRESS_MASK | GDK_BUTTON_RELEASE_MASK</property>
                                        <property name="label" translatable="yes">&lt;b&gt;Attributes&lt;/b&gt;</property>
                                        <property name="use_markup">True</property>
                                      </widget>
                                      <packing>
                                        <property name="type">label_item</property>
                                      </packing>
                                    </child>
                                  </widget>
                                  <packing>
                                    <property name="padding">2</property>
                                  </packing>
                                </child>
                                <child>
                                  <widget class="GtkFrame" id="dataFrame">
                                    <property name="visible">True</property>
                                    <property name="events">GDK_POINTER_MOTION_MASK | GDK_POINTER_MOTION_HINT_MASK | GDK_BUTTON_PRESS_MASK | GDK_BUTTON_RELEASE_MASK</property>
                                    <property name="label_xalign">0</property>
                                    <property name="shadow_type">GTK_SHADOW_NONE</property>
                                    <child>
                                      <widget class="GtkLabel" id="dataFrameLabel">
                                        <property name="visible">True</property>
                                        <property name="events">GDK_POINTER_MOTION_MASK | GDK_POINTER_MOTION_HINT_MASK | GDK_BUTTON_PRESS_MASK | GDK_BUTTON_RELEASE_MASK</property>
                                        <property name="label" translatable="yes">&lt;b&gt;Data&lt;/b&gt;</property>
                                        <property name="use_markup">True</property>
                                      </widget>
                                      <packing>
                                        <property name="type">label_item</property>
                                      </packing>
                                    </child>
                                  </widget>
                                  <packing>
                                    <property name="expand">False</property>
                                    <property name="padding">2</property>
                                    <property name="position">1</property>
                                  </packing>
                                </child>
                                <child>
                                  <widget class="GtkHBox" id="dataButtonsHBox">
                                    <property name="visible">True</property>
                                    <property name="events">GDK_POINTER_MOTION_MASK | GDK_POINTER_MOTION_HINT_MASK | GDK_BUTTON_PRESS_MASK | GDK_BUTTON_RELEASE_MASK</property>
                                    <child>
                                      <widget class="GtkButton" id="dataRevertButton">
                                        <property name="visible">True</property>
                                        <property name="can_focus">True</property>
                                        <property name="receives_default">True</property>
                                        <property name="events">GDK_POINTER_MOTION_MASK | GDK_POINTER_MOTION_HINT_MASK | GDK_BUTTON_PRESS_MASK | GDK_BUTTON_RELEASE_MASK</property>
                                        <property name="label" translatable="yes">Revert Data</property>
                                        <property name="response_id">0</property>
                                      </widget>
                                    </child>
                                    <child>
                                      <widget class="GtkButton" id="dataStoreButton">
                                        <property name="visible">True</property>
                                        <property name="can_focus">True</property>
                                        <property name="receives_default">True</property>
                                        <property name="events">GDK_POINTER_MOTION_MASK | GDK_POINTER_MOTION_HINT_MASK | GDK_BUTTON_PRESS_MASK | GDK_BUTTON_RELEASE_MASK</property>
                                        <property name="label" translatable="yes">Store Data</property>
                                        <property name="response_id">0</property>
                                      </widget>
                                      <packing>
                                        <property name="position">1</property>
                                      </packing>
                                    </child>
                                  </widget>
                                  <packing>
                                    <property name="expand">False</property>
                                    <property name="position">2</property>
                                  </packing>
                                </child>
                              </widget>
                              <packing>
                                <property name="resize">True</property>
                                <property name="shrink">False</property>
                              </packing>
                            </child>
                            <child>
                              <widget class="GtkFrame" id="commentFrame">
                                <property name="visible">True</property>
                                <property name="events">GDK_POINTER_MOTION_MASK | GDK_POINTER_MOTION_HINT_MASK | GDK_BUTTON_PRESS_MASK | GDK_BUTTON_RELEASE_MASK</property>
                                <property name="label_xalign">0</property>
                                <property name="shadow_type">GTK_SHADOW_NONE</property>
                                <child>
                                  <widget class="GtkScrolledWindow" id="commentFrameScrolledWindow">
                                    <property name="visible">True</property>
                                    <property name="can_focus">True</property>
                                    <property name="events">GDK_POINTER_MOTION_MASK | GDK_POINTER_MOTION_HINT_MASK | GDK_BUTTON_PRESS_MASK | GDK_BUTTON_RELEASE_MASK</property>
                                    <property name="hscrollbar_policy">GTK_POLICY_AUTOMATIC</property>
                                    <property name="vscrollbar_policy">GTK_POLICY_AUTOMATIC</property>
                                    <child>
                                      <widget class="GtkTextView" id="nodeComment">
                                        <property name="height_request">50</property>
                                        <property name="visible">True</property>
                                        <property name="can_focus">True</property>
                                        <property name="events">GDK_POINTER_MOTION_MASK | GDK_POINTER_MOTION_HINT_MASK | GDK_BUTTON_PRESS_MASK | GDK_BUTTON_RELEASE_MASK</property>
                                        <property name="editable">False</property>
                                        <property name="wrap_mode">GTK_WRAP_WORD</property>
                                        <property name="cursor_visible">False</property>
                                      </widget>
                                    </child>
                                  </widget>
                                </child>
                                <child>
                                  <widget class="GtkLabel" id="commentFrameLabel">
                                    <property name="visible">True</property>
                                    <property name="events">GDK_POINTER_MOTION_MASK | GDK_POINTER_MOTION_HINT_MASK | GDK_BUTTON_PRESS_MASK | GDK_BUTTON_RELEASE_MASK</property>
                                    <property name="label" translatable="yes">&lt;b&gt;Comment&lt;/b&gt;</property>
                                    <property name="use_markup">True</property>
                                  </widget>
                                  <packing>
                                    <property name="type">label_item</property>
                                  </packing>
                                </child>
                              </widget>
                              <packing>
                                <property name="resize">False</property>
                                <property name="shrink">False</property>
                              </packing>
                            </child>
                          </widget>
                          <packing>
                            <property name="resize">True</property>
                            <property name="shrink">False</property>
                          </packing>
                        </child>
                      </widget>
                    </child>
                  </widget>
                </child>
                <child>
                  <widget class="GtkLabel" id="optionsFrameLabel">
                    <property name="visible">True</property>
                    <property name="label" translatable="yes">&lt;b&gt;Option Properties&lt;/b&gt;</property>
                    <property name="use_markup">True</property>
                  </widget>
                  <packing>
                    <property name="type">label_item</property>
                  </packing>
                </child>
              </widget>
              <packing>
                <property name="resize">True</property>
                <property name="shrink">False</property>
              </packing>
            </child>
          </widget>
          <packing>
            <property name="position">1</property>
          </packing>
        </child>
        <child>
          <widget class="GtkScrolledWindow" id="errListWindow">
            <property name="can_focus">True</property>
            <property name="hscrollbar_policy">GTK_POLICY_AUTOMATIC</property>
            <property name="vscrollbar_policy">GTK_POLICY_AUTOMATIC</property>
            <child>
              <widget class="GtkTreeView" id="sch_err_list">
                <property name="can_focus">True</property>
                <property name="has_focus">True</property>
              </widget>
            </child>
          </widget>
          <packing>
            <property name="expand">False</property>
            <property name="fill">False</property>
            <property name="position">2</property>
          </packing>
        </child>
        <child>
          <widget class="GtkHButtonBox" id="plugin_buttonbox">
            <property name="visible">True</property>
            <property name="layout_style">GTK_BUTTONBOX_START</property>
            <child>
              <placeholder/>
            </child>
          </widget>
          <packing>
            <property name="expand">False</property>
            <property name="fill">False</property>
            <property name="position">3</property>
          </packing>
        </child>
        <child>
          <widget class="GtkStatusbar" id="statusBar">
            <property name="visible">True</property>
          </widget>
          <packing>
            <property name="expand">False</property>
            <property name="fill">False</property>
            <property name="position">3</property>
          </packing>
        </child>
      </widget>
    </child>
  </widget>
  <widget class="GtkDialog" id="find_dialog">
    <property name="title" translatable="yes">Find</property>
    <property name="resizable">False</property>
    <property name="type_hint">GDK_WINDOW_TYPE_HINT_DIALOG</property>
    <property name="has_separator">False</property>
    <signal name="close" handler="on_find_dialog_close"/>
    <signal name="destroy" handler="on_find_dialog_close"/>
    <child internal-child="vbox">
      <widget class="GtkVBox" id="dialog-vbox1">
        <property name="visible">True</property>
        <property name="spacing">8</property>
        <child>
          <widget class="GtkVBox" id="search_dialog_content">
            <property name="visible">True</property>
            <property name="border_width">5</property>
            <property name="spacing">18</property>
            <child>
              <widget class="GtkTable" id="table">
                <property name="visible">True</property>
                <property name="n_columns">2</property>
                <property name="column_spacing">12</property>
                <property name="row_spacing">12</property>
                <child>
                  <widget class="GtkEntry" id="search_entry">
                    <property name="visible">True</property>
                    <property name="can_focus">True</property>
                    <property name="events">GDK_POINTER_MOTION_MASK | GDK_POINTER_MOTION_HINT_MASK | GDK_BUTTON_PRESS_MASK | GDK_BUTTON_RELEASE_MASK</property>
                  </widget>
                  <packing>
                    <property name="left_attach">1</property>
                    <property name="right_attach">2</property>
                  </packing>
                </child>
                <child>
                  <widget class="GtkLabel" id="search_label">
                    <property name="visible">True</property>
                    <property name="xalign">0</property>
                    <property name="label" translatable="yes">_Search for: </property>
                    <property name="use_underline">True</property>
                  </widget>
                  <packing>
                    <property name="x_options">GTK_FILL</property>
                    <property name="y_options"></property>
                  </packing>
                </child>
              </widget>
              <packing>
                <property name="expand">False</property>
                <property name="fill">False</property>
              </packing>
            </child>
          </widget>
          <packing>
            <property name="expand">False</property>
            <property name="position">1</property>
          </packing>
        </child>
        <child>
          <widget class="GtkCheckButton" id="caseSensitiveCheckButton">
            <property name="visible">True</property>
            <property name="can_focus">True</property>
            <property name="events">GDK_POINTER_MOTION_MASK | GDK_POINTER_MOTION_HINT_MASK | GDK_BUTTON_PRESS_MASK | GDK_BUTTON_RELEASE_MASK</property>
            <property name="label" translatable="yes">Case Sensitive</property>
            <property name="response_id">0</property>
            <property name="draw_indicator">True</property>
          </widget>
          <packing>
            <property name="position">2</property>
          </packing>
        </child>
        <child>
          <widget class="GtkCheckButton" id="searchInactiveChoiceSubtreesCheckButton">
            <property name="visible">True</property>
            <property name="can_focus">True</property>
            <property name="events">GDK_POINTER_MOTION_MASK | GDK_POINTER_MOTION_HINT_MASK | GDK_BUTTON_PRESS_MASK | GDK_BUTTON_RELEASE_MASK</property>
            <property name="label" translatable="yes">Search Inactive Choice Subtrees</property>
            <property name="response_id">0</property>
            <property name="draw_indicator">True</property>
          </widget>
          <packing>
            <property name="position">3</property>
          </packing>
        </child>
        <child internal-child="action_area">
          <widget class="GtkHButtonBox" id="dialog-action_area1">
            <property name="visible">True</property>
            <property name="layout_style">GTK_BUTTONBOX_END</property>
            <child>
              <widget class="GtkButton" id="close_button">
                <property name="visible">True</property>
                <property name="can_focus">True</property>
                <property name="can_default">True</property>
                <property name="label">gtk-close</property>
                <property name="use_stock">True</property>
                <property name="response_id">0</property>
                <signal name="clicked" handler="on_close_clicked"/>
              </widget>
            </child>
            <child>
              <widget class="GtkButton" id="find_next_button">
                <property name="visible">True</property>
                <property name="can_focus">True</property>
                <property name="can_default">True</property>
                <property name="label">gtk-find</property>
                <property name="use_stock">True</property>
                <property name="response_id">0</property>
                <signal name="clicked" handler="on_find_clicked"/>
              </widget>
              <packing>
                <property name="position">1</property>
              </packing>
            </child>
          </widget>
          <packing>
            <property name="expand">False</property>
            <property name="fill">False</property>
            <property name="pack_type">GTK_PACK_END</property>
          </packing>
        </child>
      </widget>
    </child>
  </widget>
</glade-interface>
