# Supplementary material for: Spud 1.0: generalising and automating the user interfaces of scientific computer models
Source: Copernicus journal article supplement (doi:10.5194/gmd-2-33-2009), 2009-03-06
Supplement: Supplementary file 1 [file gmd-2-33-2009-supplement.zip › spud-1.0.7/diamond/plugins/test.py]

from diamond.plugins import register_plugin, cb_decorator

def plugin_applies(xpath):
  if xpath == "/my_root_element":
    return True
  else:
    return False

@cb_decorator
def handle_click(xml, xpath):
  print "xpath == ", xpath
  print "xml[0:80] == ", xml[0:80]
  print "Hello, world!"


register_plugin(plugin_applies, "Test", handle_click)
