# Supplementary material for: Spud 1.0: generalising and automating the user interfaces of scientific computer models
Source: Copernicus journal article supplement (doi:10.5194/gmd-2-33-2009), 2009-03-06
Supplement: Supplementary file 1 [file gmd-2-33-2009-supplement.zip › spud-1.0.7/diamond/README.txt]

Diamond:
http://amcg.ese.ic.ac.uk/index.php?title=Local:Diamond

The new Fluidity options system:
http://amcg.ese.ic.ac.uk/index.php?title=Local:Options

Running Fluidity from new options:
http://amcg.ese.ic.ac.uk/index.php?title=Local:Running_Fluidity_from_new_options
