# Supplementary material for: Spud 1.0: generalising and automating the user interfaces of scientific computer models
Source: Copernicus journal article supplement (doi:10.5194/gmd-2-33-2009), 2009-03-06
Supplement: Supplementary file 1 [file gmd-2-33-2009-supplement.zip › spud-1.0.7/diamond/setup.py.in]

from distutils.core import setup
from distutils.extension import Extension
import os

try:
  destdir = os.environ["DESTDIR"]
except KeyError:
  destdir = ""

setup(
      name='diamond',
      version='1.0',
      description="Fluidity preprocessor",
      author = "The ICOM team",
      author_email = "patrick.farrell@imperial.ac.uk",
      url = "http://amcg.ese.ic.ac.uk",
      packages = ['diamond'],
      package_dir = {'diamond': 'diamond'},
      scripts=["bin/diamond"],
      data_files = [(destdir + "@prefix@/share/diamond/gui", ["gui/gui.glade", "gui/diamond.svg"])],
     )
