# Supplementary material for: Spud 1.0: generalising and automating the user interfaces of scientific computer models
Source: Copernicus journal article supplement (doi:10.5194/gmd-2-33-2009), 2009-03-06
Supplement: Supplementary file 1 [file gmd-2-33-2009-supplement.zip › spud-1.0.7/diamond/tests/read_xml/find_hidden_xmldata.py]

#!/usr/bin/env python

import diamond.schema
import unittest

class FindHiddenModule(unittest.TestCase):
	def testNoMagicComments(self):
		hiddens = schema.find_hidden_xmldata(
		self.assertEqual(self.schema.tree.getroot(), None)

if __name__ == '__main__':
	unittest.main()
