# Supplementary material for: Spud 1.0: generalising and automating the user interfaces of scientific computer models
Source: Copernicus journal article supplement (doi:10.5194/gmd-2-33-2009), 2009-03-06
Supplement: Supplementary file 1 [file gmd-2-33-2009-supplement.zip › spud-1.0.7/diamond/tests/schema/test_cb_methods.py]

#!/usr/bin/env python

import diamond.schema
import unittest

class TestSchemaModule(unittest.TestCase):
	def setUp(self):
		self.schema = diamond.schema.Schema("first.rng")

	def testName(self):
		root=self.schema.tree.getroot()
		self.cb_name(root.children[0], {})
		

if __name__ == '__main__':
	unittest.main()
