# Supplementary material for: Spud 1.0: generalising and automating the user interfaces of scientific computer models
Source: Copernicus journal article supplement (doi:10.5194/gmd-2-33-2009), 2009-03-06
Supplement: Supplementary file 1 [file gmd-2-33-2009-supplement.zip › spud-1.0.7/diamond/tests/to_test.txt]

schema.py
	TREE
	read
	xml_read_merge
	construct_priority_queue
	init_avail_data
	assign_xml_nodes
	assign_xml_children
	check_unused_nodes
	append_children
	read_children
	find_hidden_xmldata
	xml_read_core
tree.py
