# Supplementary material for: Spud 1.0: generalising and automating the user interfaces of scientific computer models
Source: Copernicus journal article supplement (doi:10.5194/gmd-2-33-2009), 2009-03-06
Supplement: Supplementary file 1 [file gmd-2-33-2009-supplement.zip › spud-1.0.7/doc/Makefile]

default: spud_manual.pdf

%.pdf: %.tex
	pdflatex $^
	if fgrep "Rerun to" $*.log; then $(MAKE) --assume-new $^ $@;fi
ifndef NOBIBTEX
	if fgrep "There were undefined"  $*.log;\
	then bibtex $*; \
	$(MAKE) NOBIBTEX=true --assume-new $^ $@;fi
endif

# We don't rm *.ps *.pdf because that might clobber image files. Instead, put any
# ps files which should go in $(PSFILES)
clean: 
	rm $(TARGETS) $(PSFILES) *.eps *.dvi *.aux *.log *.bbl *.blg *.out *.toc 2>/dev/null||true
