# Supplementary material for: Spud 1.0: generalising and automating the user interfaces of scientific computer models
Source: Copernicus journal article supplement (doi:10.5194/gmd-2-33-2009), 2009-03-06
Supplement: Supplementary file 1 [file gmd-2-33-2009-supplement.zip › spud-1.0.7/examples/ballistics.rng]

<?xml version="1.0" encoding="UTF-8"?>
<grammar xmlns:a="http://relaxng.org/ns/compatibility/annotations/1.0" xmlns="http://relaxng.org/ns/structure/1.0" datatypeLibrary="">
  <include href="spud_base.rng"/>
  <start>
    <element name="ballistics_options">
      <element name="simulation_name">
        <ref name="filename">
          <a:documentation>The name of the simulation.
This will be used as the basename of output files. </a:documentation>
        </ref>
      </element>
      <!--
        Timestepping_options is a named pattern defined below. 
        In this case this is used to reduce clutter and increase readability.
      -->
      <ref name="timestepping_options"/>
      <element name="gravity">
        <ref name="real">
          <a:documentation>The acceleration due to gravity measured downwards.
e.g. 9.8</a:documentation>
        </ref>
      </element>
      <oneOrMore>
        <ref name="projectile"/>
      </oneOrMore>
      <!-- The + means one or more projectiles. -->
      <element name="geometry">
        <element name="dimension">
          <element name="integer_value">
            <a:documentation>Only 2D simulations are suppored by ballistics.</a:documentation>
            <attribute name="rank">
              <value>0</value>
            </attribute>
            <value>2</value>
          </element>
        </element>
      </element>
    </element>
  </start>
  <define name="timestepping_options">
    <element name="timestepping">
      <element name="dt">
        <ref name="real">
          <a:documentation>The length of each timestep.</a:documentation>
        </ref>
      </element>
      <element name="finish_time">
        <ref name="real">
          <a:documentation>The time at which the simulation should stop.</a:documentation>
        </ref>
      </element>
      <element name="time_integration_scheme">
        <element name="string_value">
          <a:documentation>The algorithm which will be used to move the projectiles. 
explicit_euler is the first order unstable numeric scheme.
analytic is the analytic solution.</a:documentation>
          <!--
            Lines is a hint to the gui about the size of the text box.
            It is not an enforced limit on string length.
          -->
          <attribute name="lines">
            <value>1</value>
          </attribute>
          <choice>
            <value>explicit_euler</value>
            <value>analytic</value>
          </choice>
        </element>
      </element>
    </element>
  </define>
  <define name="projectile">
    <element name="projectile">
      <attribute name="name">
        <a:documentation>An object with a velocity. Projectiles move during the simulation 
and are accelerated by gravity.

The projectile name identifies this projectile in the output.</a:documentation>
        <data type="string"/>
      </attribute>
      <element name="initial_velocity">
        <ref name="real_dim_vector">
          <a:documentation>Velocity of the projectile at launch.</a:documentation>
        </ref>
      </element>
      <element name="launch_position">
        <ref name="real_dim_minus_one_vector">
          <a:documentation>Position along the x axis at which the projectile begins.</a:documentation>
        </ref>
      </element>
    </element>
  </define>
</grammar>
