# Supplementary material for: Spud 1.0: generalising and automating the user interfaces of scientific computer models
Source: Copernicus journal article supplement (doi:10.5194/gmd-2-33-2009), 2009-03-06
Supplement: Supplementary file 1 [file gmd-2-33-2009-supplement.zip › spud-1.0.7/examples/ballistics.xml]

<?xml version='1.0' encoding='utf8'?>
<ballistics_options>
  <simulation_name>
    <string_value lines="1" type="filename">bal1</string_value>
  </simulation_name>
  <timestepping>
    <dt>
      <real_value rank="0">0.1</real_value>
    </dt>
    <finish_time>
      <real_value rank="0">10</real_value>
    </finish_time>
    <time_integration_scheme>
      <string_value lines="1">explicit_euler</string_value>
    </time_integration_scheme>
  </timestepping>
  <gravity>
    <real_value rank="0">10</real_value>
  </gravity>
  <projectile name="proj1">
    <initial_velocity>
      <real_value shape="2" dim1="dim" rank="1">10 10</real_value>
    </initial_velocity>
    <launch_position>
      <real_value shape="1" dim1="dim-1" rank="1">10</real_value>
    </launch_position>
  </projectile>
  <projectile name="proj2">
    <initial_velocity>
      <real_value shape="2" dim1="dim" rank="1">-5 10</real_value>
    </initial_velocity>
    <launch_position>
      <real_value shape="1" dim1="dim-1" rank="1">20</real_value>
    </launch_position>
  </projectile>
  <geometry>
    <dimension>
      <integer_value rank="0">2</integer_value>
    </dimension>
  </geometry>
</ballistics_options>
