# Supplementary material for: Spud 1.0: generalising and automating the user interfaces of scientific computer models
Source: Copernicus journal article supplement (doi:10.5194/gmd-2-33-2009), 2009-03-06
Supplement: Supplementary file 1 [file gmd-2-33-2009-supplement.zip › spud-1.0.7/examples/Makefile.in]

#    Copyright (C) 2007 Imperial College London and others.
#
#    Please see the AUTHORS file in the main source directory for a full list
#    of copyright holders.
#
#    Applied Modelling and Computation Group
#    Department of Earth Science and Engineering
#    Imperial College London
#
#    David.Ham@Imperial.ac.uk
#
#    This library is free software; you can redistribute it and/or
#    modify it under the terms of the GNU Lesser General Public
#    License as published by the Free Software Foundation,
#    version 2.1 of the License.
#
#    This library is distributed in the hope that it will be useful,
#    but WITHOUT ANY WARRANTY; without even the implied warranty of
#    MERCHANTABILITY or FITNESS FOR A PARTICULAR PURPOSE.  See the GNU
#    Lesser General Public License for more details.
#
#    You should have received a copy of the GNU Lesser General Public
#    License along with this library; if not, write to the Free Software
#    Foundation, Inc., 59 Temple Place, Suite 330, Boston, MA  02111-1307
#    USA

FC      = @FC@
FCFLAGS = -I../include @FCFLAGS@ 

CXX = @CXX@ -I../include
CXXFLAGS= @CPPFLAGS@ @CXXFLAGS@ -I../include

LIB = ../libspud.a

HEADERS = ../include/cspud.h ../include/spud.h ../include/spud_config.h ../include/spud_enums.h ../include/tinystr.h ../include/tinyxml.h

BINARIES=ballistics

.SUFFIXES: .f90 .F90 .c .cpp .o .a $(.SUFFIXES)

%.o:	%.f90
	$(FC) $(FCFLAGS) -c $<
%.o:	%.F90
	$(FC) $(FCFLAGS) -c $<
%.o:	%.c
	$(CC) $(CFLAGS) -c $<
%.o:	%.cpp
	$(CXX) $(CXXFLAGS) -c $<

ballistics: ballistics.o
	$(FC) -o $@ $^ -L../  $(LIB) -lstdc++ @PROFILING_FLAG@

clean:
	rm -f $(BINARIES)
	rm -f *.o *.mod *.output
