# Supplementary material for: Spud 1.0: generalising and automating the user interfaces of scientific computer models
Source: Copernicus journal article supplement (doi:10.5194/gmd-2-33-2009), 2009-03-06
Supplement: Supplementary file 1 [file gmd-2-33-2009-supplement.zip › spud-1.0.7/examples/show_ballistics]

#!/usr/bin/python
from optparse import OptionParser
import sys
import numpy
import pylab

# Script starts here.
optparser=OptionParser(usage='usage: %prog  <filename.csv>',
                       add_help_option=True,
                       description="""This plots the result of a ballistics simulation """)

(options, argv) = optparser.parse_args()

if len(argv)!=1:
    optparser.print_help()
    sys.exit(1)

output=file(argv[0], 'r')

header=output.readline().split(",")

column_count=len(header)

projectile_count=(column_count-1)/2

data=numpy.fromfile(output, sep=",")

data=data.reshape(data.size/column_count, column_count)

for i in range(projectile_count):
    pylab.plot(data[:,2*(i+1)-1], data[:,2*(i+1)],'+-')

pylab.legend([field[:-2] for field in header[1::2]])

pylab.show()
