# Supplementary material for: Spud 1.0: generalising and automating the user interfaces of scientific computer models
Source: Copernicus journal article supplement (doi:10.5194/gmd-2-33-2009), 2009-03-06
Supplement: Supplementary file 1 [file gmd-2-33-2009-supplement.zip › spud-1.0.7/Makefile.in]

#    Copyright (C) 2007 Imperial College London and others.
#
#    Please see the AUTHORS file in the main source directory for a full list
#    of copyright holders.
#
#    Applied Modelling and Computation Group
#    Department of Earth Science and Engineering
#    Imperial College London
#
#    David.Ham@Imperial.ac.uk
#
#    This library is free software; you can redistribute it and/or
#    modify it under the terms of the GNU Lesser General Public
#    License as published by the Free Software Foundation,
#    version 2.1 of the License.
#
#    This library is distributed in the hope that it will be useful,
#    but WITHOUT ANY WARRANTY; without even the implied warranty of
#    MERCHANTABILITY or FITNESS FOR A PARTICULAR PURPOSE.  See the GNU
#    Lesser General Public License for more details.
#
#    You should have received a copy of the GNU Lesser General Public
#    License along with this library; if not, write to the Free Software
#    Foundation, Inc., 59 Temple Place, Suite 330, Boston, MA  02111-1307
#    USA

SHELL = /bin/sh

FC      = @FC@
FCFLAGS = @CPPFLAGS@ @FCFLAGS@ -Iinclude

CXX     = @CXX@
CXXFLAGS= @CPPFLAGS@ @CXXFLAGS@ -Iinclude

MAKE    = @MAKE@
AR      = @AR@
ARFLAGS = @ARFLAGS@

LIB = libspud.a

HEADERS = include/cspud.h include/spud.h include/spud_config.h include/spud_enums.h include/tinystr.h include/tinyxml.h
MODS = spud.mod
OBJS = fspud.o spud.o spud_interfaces.o tinystr.o tinyxml.o tinyxmlerror.o tinyxmlparser.o

VPATH = src/

.SUFFIXES: .f90 .F90 .c .cpp .o .a

.f90.o:
	$(FC) $(FCFLAGS) -c $<
.cpp.o:
	$(CXX) $(CXXFLAGS) -c $<

default: libspud.a build-diamond

libspud.a: $(OBJS)
	$(AR) $(ARFLAGS) $(LIB) $(OBJS)

build-diamond:
	cd diamond; python setup.py build; cd ..

test: unittest

unittest: libspud.a
	@cd src/tests; $(MAKE)

.PHONY:doc

doc: 
	@cd doc; $(MAKE) spud_manual.pdf

install: install-libspud install-spudtools install-diamond

install-libspud: libspud.a
	@INSTALL@ -d $(DESTDIR)@prefix@/lib
	@INSTALL@ -d $(DESTDIR)@prefix@/include
	@INSTALL@ $(LIB) $(DESTDIR)@prefix@/lib
	@INSTALL@ $(MODS) $(DESTDIR)@prefix@/include
	@INSTALL@ $(HEADERS) $(DESTDIR)@prefix@/include

install-spudtools: 
	@INSTALL@ -d $(DESTDIR)@prefix@/share/spud
	@INSTALL@ -d $(DESTDIR)@prefix@/bin
	@INSTALL@ -m755 bin/spud-preprocess $(DESTDIR)@prefix@/bin
	@INSTALL@ -m755 bin/spud-set $(DESTDIR)@prefix@/bin
	@INSTALL@ -m644 schema/spud_base.rnc $(DESTDIR)@prefix@/share/spud
	@INSTALL@ -m644 schema/spud_base.rng $(DESTDIR)@prefix@/share/spud

install-diamond:
	cd diamond;	python setup.py install --prefix=$(DESTDIR)@prefix@; cd ..

clean:
	@cd doc; $(MAKE) clean
	rm -f *.o libspud.a $(MODS) $(OBJS)
	@cd src/tests; $(MAKE) clean

distclean: clean
	rm -fr config.log config.status autom4te.cache Makefile
	rm -f include/spud_config.h
	rm -f bin/spud-preprocess diamond/diamond/preprocess.py
	@cd src/tests; $(MAKE) distclean
