# Supplementary material for: Spud 1.0: generalising and automating the user interfaces of scientific computer models
Source: Copernicus journal article supplement (doi:10.5194/gmd-2-33-2009), 2009-03-06
Supplement: Supplementary file 1 [file gmd-2-33-2009-supplement.zip › spud-1.0.7/schema/spud_base.rnc]

# Any value in the xml file can be accompanied by a comment
# displayed together in the gui.
comment =
   element comment {
      xsd:string
   }?

# A simple string
anystring =
   (
      element string_value{
         # Lines is a hint to the gui about the size of the text box.
         # It is not an enforced limit on string length.
         attribute lines { "1" },
         xsd:string
      },
      comment
   )

# a filename for which the gui 
filename =
   (
      element string_value{
         attribute type { "filename" },
         # Lines is a hint to the gui about the size of the text box.
         # It is not an enforced limit on string length.
         attribute lines { "1" },
         xsd:string
      },
      comment
   )

# python_code is just a long string
python_code =
   (
      element string_value{
         attribute type { "python" },
         # Lines is a hint to the gui about the size of the text box.
         # It is not an enforced limit on string length.
         attribute lines { "20" },
         xsd:string
      },
      comment
   )

integer =
   (
      element integer_value{
         attribute rank { "0" },
         list {xsd:integer}
      },
      comment
   )

# an integer vector of any length
integer_vector =
   (
      element integer_value{
         attribute rank { "1" },
         attribute shape { xsd:integer },
         list {xsd:integer+}
      },
      comment
   )

# an integer tensor of any shape
integer_tensor =
   (
      element integer_value{
         attribute rank { "2" },
         attribute shape { list{xsd:integer, xsd:integer} },
         list {xsd:integer+}
      },
      comment
   )

# An integer vector of length dim
integer_dim_vector =
   (
      element integer_value{
         attribute rank { "1" },
         # Setting dim1 to a function of dim allows the gui to set the
         # vector to the right length.
         attribute dim1 { "dim" },
         attribute shape { xsd:integer },
         list {xsd:integer+}
      },
      comment
   )

# An dim x dim integer matrix (rank 2 tensor).
integer_dim_tensor =
   (
      element integer_value{
         attribute rank { "2" },
         # Setting dim1, dim2 to a function of dim allows the gui to set the
         # tensor to the right shape.
         attribute dim1 { "dim" },
         attribute dim2 { "dim" },
         attribute shape { list{xsd:integer, xsd:integer} },
         list {xsd:integer+}
      },
      comment
   )

real =
   (
      element real_value{
         attribute rank { "0" },
         list {xsd:float}
      },
      comment
   )

# An arbitrary length real vector
real_vector =
   (
      element real_value{
         attribute rank { "1" },
         attribute shape { xsd:integer },
         list {xsd:float+}
      },
      comment
   )

# An arbitrary size real matrix (rank 2 tensor).
real_tensor =
   (
      element real_value{
         attribute rank { "2" },
         attribute shape { list{xsd:integer, xsd:integer} },
         list {xsd:float+}
      },
      comment
   )

# A real vector of length dim
real_dim_vector =
   (
      element real_value{
         attribute rank { "1" },
         # Setting dim1 to a function of dim allows the gui to set the
         # vector to the right length.
         attribute dim1 { "dim" },
         attribute shape { xsd:integer },
         list{xsd:float+}
      },
      comment
   )

# A real vector of length dim minus one
real_dim_minus_one_vector =
   (
      element real_value{
         attribute rank { "1" },
         # Setting dim1 to a function of dim allows the gui to set the
         # vector to the right length.
         attribute dim1 { "dim-1" },
         attribute shape { xsd:integer },
         list{xsd:float+}
      },
      comment
   )

# A dim x dim real matrix (rank 2 tensor).
real_dim_tensor =
   (
      element real_value{
         attribute symmetric {"false"},
         attribute rank { "2" },
         # Setting dim1, dim2 to a function of dim allows the gui to set the
         # tensor to the right shape.
         attribute dim1 { "dim" },
         attribute dim2 { "dim" },
         attribute shape { list{xsd:integer, xsd:integer} },
         list {xsd:float+}
      },
      comment
   )

# A dim x dim real matrix (rank 2 tensor) constrained to be symmetric.
real_dim_symmetric_tensor =
   (
      element real_value{
         attribute symmetric {"true"},
         attribute rank { "2" },
         attribute dim1 { "dim" },
         attribute dim2 { "dim" },
         attribute shape { list{xsd:integer, xsd:integer} },
         list {xsd:float+}
      },
      comment
   )

# A dim-1 x dim-1 real matrix (rank 2 tensor).
real_dim_minus_one_tensor =
   (
      element real_value{
         attribute symmetric {"false"},
         attribute rank { "2" },
         # Setting dim1, dim2 to a function of dim allows the gui to set the
         # tensor to the right shape.
         attribute dim1 { "dim-1" },
         attribute dim2 { "dim-1" },
         attribute shape { list{xsd:integer, xsd:integer} },
         list {xsd:float+}
      },
      comment
   )

# A dim-1 x dim-1 real matrix (rank 2 tensor) constrained to be symmetric.
real_dim_minus_one_symmetric_tensor =
   (
      element real_value{
         attribute symmetric {"true"},
         attribute rank { "2" },
         # Setting dim1, dim2 to a function of dim allows the gui to set the
         # tensor to the right shape.
         attribute dim1 { "dim-1" },
         attribute dim2 { "dim-1" },
         attribute shape { list{xsd:integer, xsd:integer} },
         list {xsd:float+}
      },
      comment
   )
