# Supplementary material for: Spud 1.0: generalising and automating the user interfaces of scientific computer models
Source: Copernicus journal article supplement (doi:10.5194/gmd-2-33-2009), 2009-03-06
Supplement: Supplementary file 1 [file gmd-2-33-2009-supplement.zip › spud-1.0.7/schema/spud_base.rng]

<?xml version="1.0" encoding="UTF-8"?>
<grammar xmlns="http://relaxng.org/ns/structure/1.0" datatypeLibrary="http://www.w3.org/2001/XMLSchema-datatypes">
  <!--
    Any value in the xml file can be accompanied by a comment
    displayed together in the gui.
  -->
  <define name="comment">
    <optional>
      <element name="comment">
        <data type="string"/>
      </element>
    </optional>
  </define>
  <!-- A simple string -->
  <define name="anystring">
    <element name="string_value">
      <!--
        Lines is a hint to the gui about the size of the text box.
        It is not an enforced limit on string length.
      -->
      <attribute name="lines">
        <value>1</value>
      </attribute>
      <data type="string"/>
    </element>
    <ref name="comment"/>
  </define>
  <!-- a filename for which the gui -->
  <define name="filename">
    <element name="string_value">
      <attribute name="type">
        <value>filename</value>
      </attribute>
      <!--
        Lines is a hint to the gui about the size of the text box.
        It is not an enforced limit on string length.
      -->
      <attribute name="lines">
        <value>1</value>
      </attribute>
      <data type="string"/>
    </element>
    <ref name="comment"/>
  </define>
  <!-- python_code is just a long string -->
  <define name="python_code">
    <element name="string_value">
      <attribute name="type">
        <value>python</value>
      </attribute>
      <!--
        Lines is a hint to the gui about the size of the text box.
        It is not an enforced limit on string length.
      -->
      <attribute name="lines">
        <value>20</value>
      </attribute>
      <data type="string"/>
    </element>
    <ref name="comment"/>
  </define>
  <define name="integer">
    <element name="integer_value">
      <attribute name="rank">
        <value>0</value>
      </attribute>
      <list>
        <data type="integer"/>
      </list>
    </element>
    <ref name="comment"/>
  </define>
  <!-- an integer vector of any length -->
  <define name="integer_vector">
    <element name="integer_value">
      <attribute name="rank">
        <value>1</value>
      </attribute>
      <attribute name="shape">
        <data type="integer"/>
      </attribute>
      <list>
        <oneOrMore>
          <data type="integer"/>
        </oneOrMore>
      </list>
    </element>
    <ref name="comment"/>
  </define>
  <!-- an integer tensor of any shape -->
  <define name="integer_tensor">
    <element name="integer_value">
      <attribute name="rank">
        <value>2</value>
      </attribute>
      <attribute name="shape">
        <list>
          <data type="integer"/>
          <data type="integer"/>
        </list>
      </attribute>
      <list>
        <oneOrMore>
          <data type="integer"/>
        </oneOrMore>
      </list>
    </element>
    <ref name="comment"/>
  </define>
  <!-- An integer vector of length dim -->
  <define name="integer_dim_vector">
    <element name="integer_value">
      <attribute name="rank">
        <value>1</value>
      </attribute>
      <!--
        Setting dim1 to a function of dim allows the gui to set the
        vector to the right length.
      -->
      <attribute name="dim1">
        <value>dim</value>
      </attribute>
      <attribute name="shape">
        <data type="integer"/>
      </attribute>
      <list>
        <oneOrMore>
          <data type="integer"/>
        </oneOrMore>
      </list>
    </element>
    <ref name="comment"/>
  </define>
  <!-- An dim x dim integer matrix (rank 2 tensor). -->
  <define name="integer_dim_tensor">
    <element name="integer_value">
      <attribute name="rank">
        <value>2</value>
      </attribute>
      <!--
        Setting dim1, dim2 to a function of dim allows the gui to set the
        tensor to the right shape.
      -->
      <attribute name="dim1">
        <value>dim</value>
      </attribute>
      <attribute name="dim2">
        <value>dim</value>
      </attribute>
      <attribute name="shape">
        <list>
          <data type="integer"/>
          <data type="integer"/>
        </list>
      </attribute>
      <list>
        <oneOrMore>
          <data type="integer"/>
        </oneOrMore>
      </list>
    </element>
    <ref name="comment"/>
  </define>
  <define name="real">
    <element name="real_value">
      <attribute name="rank">
        <value>0</value>
      </attribute>
      <list>
        <data type="float"/>
      </list>
    </element>
    <ref name="comment"/>
  </define>
  <!-- An arbitrary length real vector -->
  <define name="real_vector">
    <element name="real_value">
      <attribute name="rank">
        <value>1</value>
      </attribute>
      <attribute name="shape">
        <data type="integer"/>
      </attribute>
      <list>
        <oneOrMore>
          <data type="float"/>
        </oneOrMore>
      </list>
    </element>
    <ref name="comment"/>
  </define>
  <!-- An arbitrary size real matrix (rank 2 tensor). -->
  <define name="real_tensor">
    <element name="real_value">
      <attribute name="rank">
        <value>2</value>
      </attribute>
      <attribute name="shape">
        <list>
          <data type="integer"/>
          <data type="integer"/>
        </list>
      </attribute>
      <list>
        <oneOrMore>
          <data type="float"/>
        </oneOrMore>
      </list>
    </element>
    <ref name="comment"/>
  </define>
  <!-- A real vector of length dim -->
  <define name="real_dim_vector">
    <element name="real_value">
      <attribute name="rank">
        <value>1</value>
      </attribute>
      <!--
        Setting dim1 to a function of dim allows the gui to set the
        vector to the right length.
      -->
      <attribute name="dim1">
        <value>dim</value>
      </attribute>
      <attribute name="shape">
        <data type="integer"/>
      </attribute>
      <list>
        <oneOrMore>
          <data type="float"/>
        </oneOrMore>
      </list>
    </element>
    <ref name="comment"/>
  </define>
  <!-- A real vector of length dim minus one -->
  <define name="real_dim_minus_one_vector">
    <element name="real_value">
      <attribute name="rank">
        <value>1</value>
      </attribute>
      <!--
        Setting dim1 to a function of dim allows the gui to set the
        vector to the right length.
      -->
      <attribute name="dim1">
        <value>dim-1</value>
      </attribute>
      <attribute name="shape">
        <data type="integer"/>
      </attribute>
      <list>
        <oneOrMore>
          <data type="float"/>
        </oneOrMore>
      </list>
    </element>
    <ref name="comment"/>
  </define>
  <!-- A dim x dim real matrix (rank 2 tensor). -->
  <define name="real_dim_tensor">
    <element name="real_value">
      <attribute name="symmetric">
        <value>false</value>
      </attribute>
      <attribute name="rank">
        <value>2</value>
      </attribute>
      <!--
        Setting dim1, dim2 to a function of dim allows the gui to set the
        tensor to the right shape.
      -->
      <attribute name="dim1">
        <value>dim</value>
      </attribute>
      <attribute name="dim2">
        <value>dim</value>
      </attribute>
      <attribute name="shape">
        <list>
          <data type="integer"/>
          <data type="integer"/>
        </list>
      </attribute>
      <list>
        <oneOrMore>
          <data type="float"/>
        </oneOrMore>
      </list>
    </element>
    <ref name="comment"/>
  </define>
  <!-- A dim x dim real matrix (rank 2 tensor) constrained to be symmetric. -->
  <define name="real_dim_symmetric_tensor">
    <element name="real_value">
      <attribute name="symmetric">
        <value>true</value>
      </attribute>
      <attribute name="rank">
        <value>2</value>
      </attribute>
      <attribute name="dim1">
        <value>dim</value>
      </attribute>
      <attribute name="dim2">
        <value>dim</value>
      </attribute>
      <attribute name="shape">
        <list>
          <data type="integer"/>
          <data type="integer"/>
        </list>
      </attribute>
      <list>
        <oneOrMore>
          <data type="float"/>
        </oneOrMore>
      </list>
    </element>
    <ref name="comment"/>
  </define>
  <!-- A dim-1 x dim-1 real matrix (rank 2 tensor). -->
  <define name="real_dim_minus_one_tensor">
    <element name="real_value">
      <attribute name="symmetric">
        <value>false</value>
      </attribute>
      <attribute name="rank">
        <value>2</value>
      </attribute>
      <!--
        Setting dim1, dim2 to a function of dim allows the gui to set the
        tensor to the right shape.
      -->
      <attribute name="dim1">
        <value>dim-1</value>
      </attribute>
      <attribute name="dim2">
        <value>dim-1</value>
      </attribute>
      <attribute name="shape">
        <list>
          <data type="integer"/>
          <data type="integer"/>
        </list>
      </attribute>
      <list>
        <oneOrMore>
          <data type="float"/>
        </oneOrMore>
      </list>
    </element>
    <ref name="comment"/>
  </define>
  <!-- A dim-1 x dim-1 real matrix (rank 2 tensor) constrained to be symmetric. -->
  <define name="real_dim_minus_one_symmetric_tensor">
    <element name="real_value">
      <attribute name="symmetric">
        <value>true</value>
      </attribute>
      <attribute name="rank">
        <value>2</value>
      </attribute>
      <!--
        Setting dim1, dim2 to a function of dim allows the gui to set the
        tensor to the right shape.
      -->
      <attribute name="dim1">
        <value>dim-1</value>
      </attribute>
      <attribute name="dim2">
        <value>dim-1</value>
      </attribute>
      <attribute name="shape">
        <list>
          <data type="integer"/>
          <data type="integer"/>
        </list>
      </attribute>
      <list>
        <oneOrMore>
          <data type="float"/>
        </oneOrMore>
      </list>
    </element>
    <ref name="comment"/>
  </define>
</grammar>
