# Supplementary material for: Spud 1.0: generalising and automating the user interfaces of scientific computer models
Source: Copernicus journal article supplement (doi:10.5194/gmd-2-33-2009), 2009-03-06
Supplement: Supplementary file 1 [file gmd-2-33-2009-supplement.zip › spud-1.0.7/src/tests/test_main.cpp]

/*  Copyright (C) 2006 Imperial College London and others.
    
    Please see the AUTHORS file in the main source directory for a full list
    of copyright holders.

    Applied Modelling and Computation Group
    Department of Earth Science and Engineering
    Imperial College London

    David.Ham@Imperial.ac.uk
    
    This library is free software; you can redistribute it and/or
    modify it under the terms of the GNU Lesser General Public
    License as published by the Free Software Foundation,
    version 2.1 of the License.

    This library is distributed in the hope that it will be useful,
    but WITHOUT ANY WARRANTY; without even the implied warranty of
    MERCHANTABILITY or FITNESS FOR A PARTICULAR PURPOSE.  See the GNU
    Lesser General Public License for more details.

    You should have received a copy of the GNU Lesser General Public
    License along with this library; if not, write to the Free Software
    Foundation, Inc., 59 Temple Place, Suite 330, Boston, MA  02111-1307
    USA
*/

#include <stdlib.h>
#include <unistd.h>

#include "spud_config.h"

#ifdef HAVE_MPI
#include <mpi.h>
#endif

extern "C"{
  void TESTNAME();
}

int main(int argc, char **argv) {
#ifdef HAVE_MPI
  MPI::Init(argc, argv);
  chdir(getenv("PWD"));
#endif
  TESTNAME();
#ifdef HAVE_MPI
  MPI::Finalize();
#endif

  return 0;
}
